# Supplementary material for: Extracellular vesicles secreted by 3D tumor organoids are enriched for immune regulatory signaling biomolecules compared to conventional 2D glioblastoma cell systems
Source: PubMed Central journal article supplement (PMC11079215; doi:10.3389/fimmu.2024.1388769), 2024-04-25

# PP EV surface marker staining

| Cell line name in the manuscript | Cell line name in the gating dot plot |
|----------------------------------|---------------------------------------|
| BTIC10                           | 21                                    |
| BTIC13                           | 27                                    |
| BTIC131                          | 344                                   |
| BTIC18                           | 57                                    |
| BTIC129                          | 337                                   |
| BTIC155                          | NP25                                  |

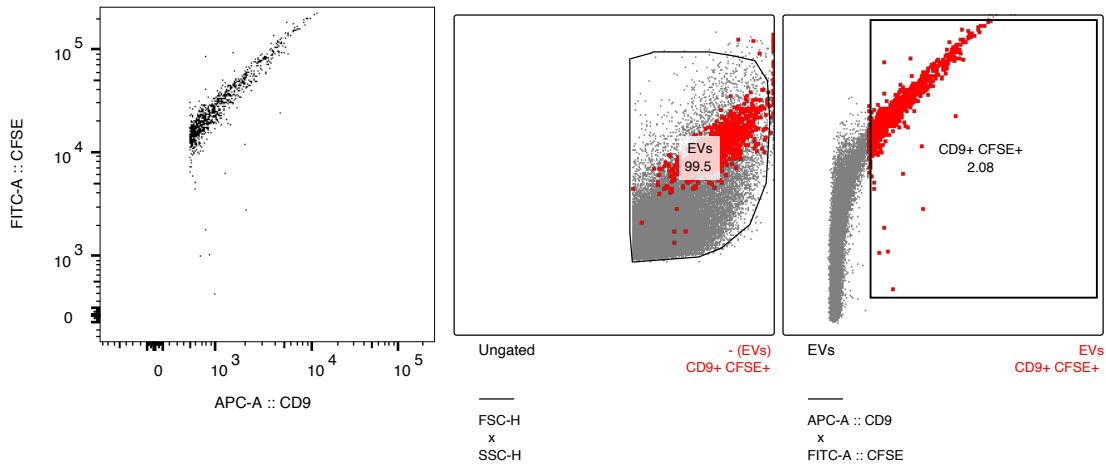

| Sample Name                              | Freq. of EVs |
|------------------------------------------|--------------|
| Specimen_001_21-2D (EV staining)_001.fcs | 2.08         |

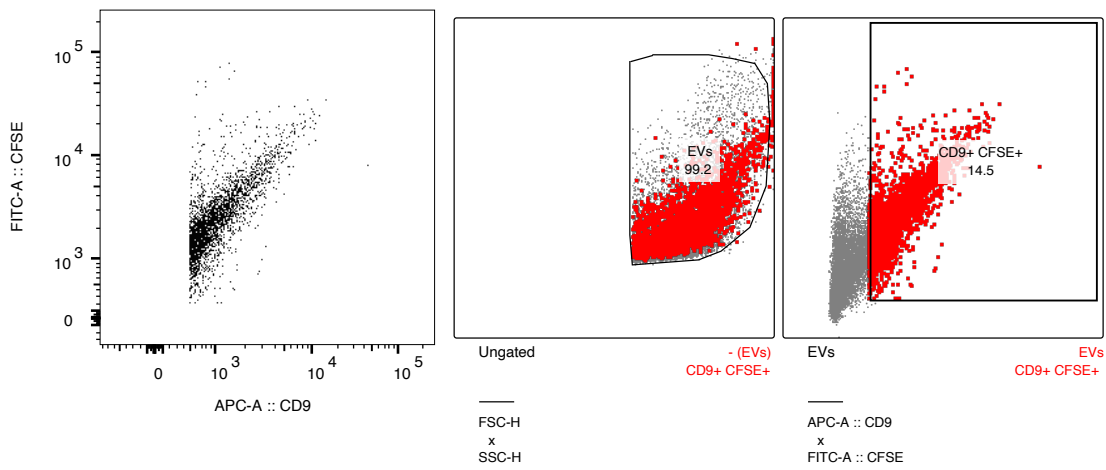

| Sample Name                               | Freq. of EVs |
|-------------------------------------------|--------------|
| Specimen_001_337-2D (EV staining)_009.fcs | 14.5         |

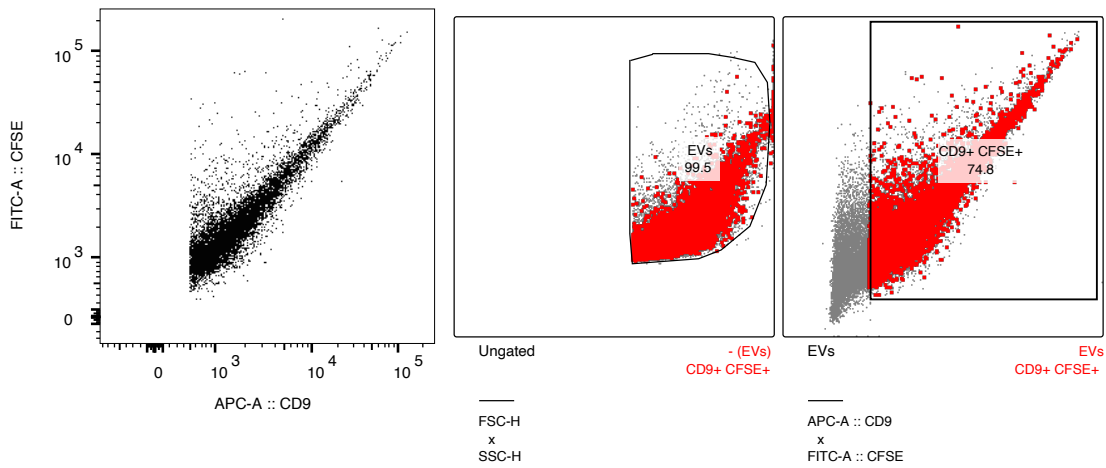

| Sample Name                              | Freq. of EVs |
|------------------------------------------|--------------|
| Specimen_001_57-2D (EV staining)_017.fcs | 74.8         |

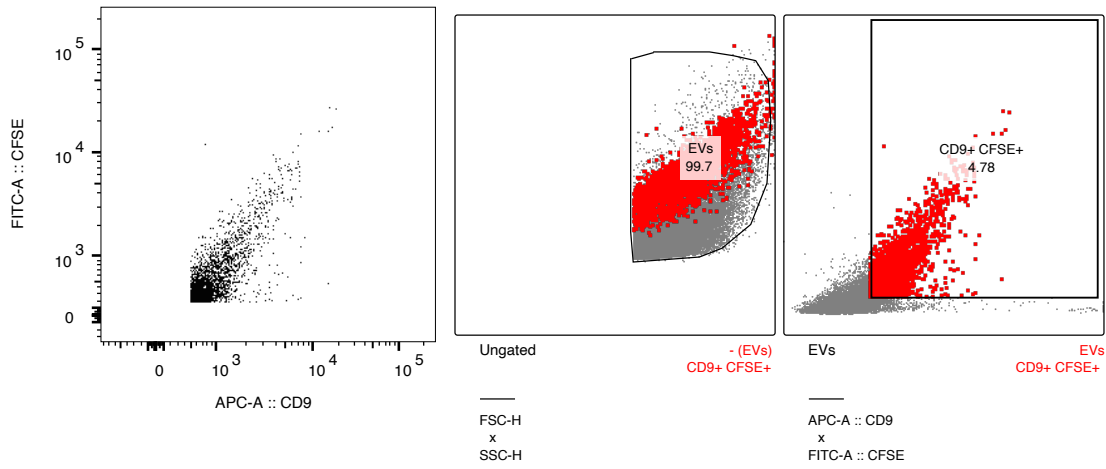

| Sample Name                               | Freq. of EVs |
|-------------------------------------------|--------------|
| Specimen_001_21-2D (IgG staining)_002.fcs | 4.78         |

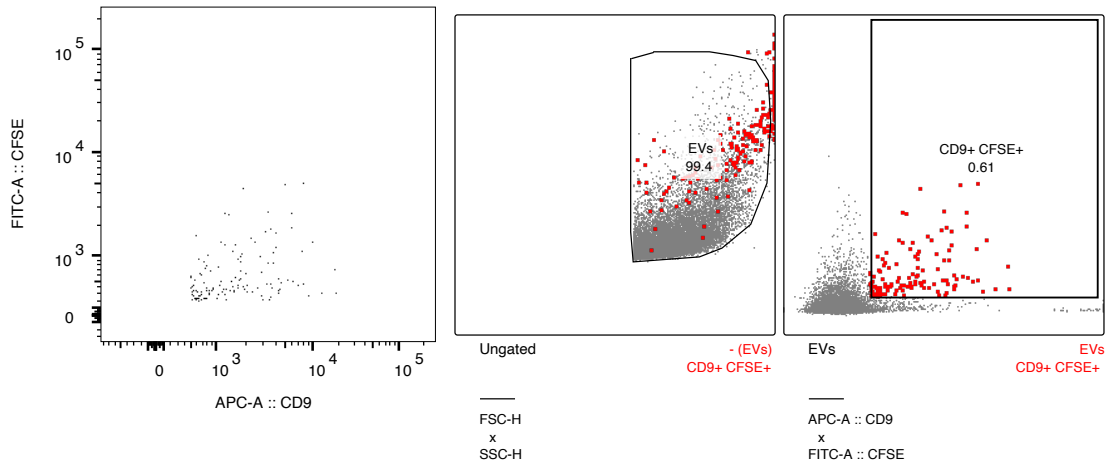

| Sample Name                                | Freq. of EVs |
|--------------------------------------------|--------------|
| Specimen_001_337-2D (IGG staining)_010.fcs | 0.61         |

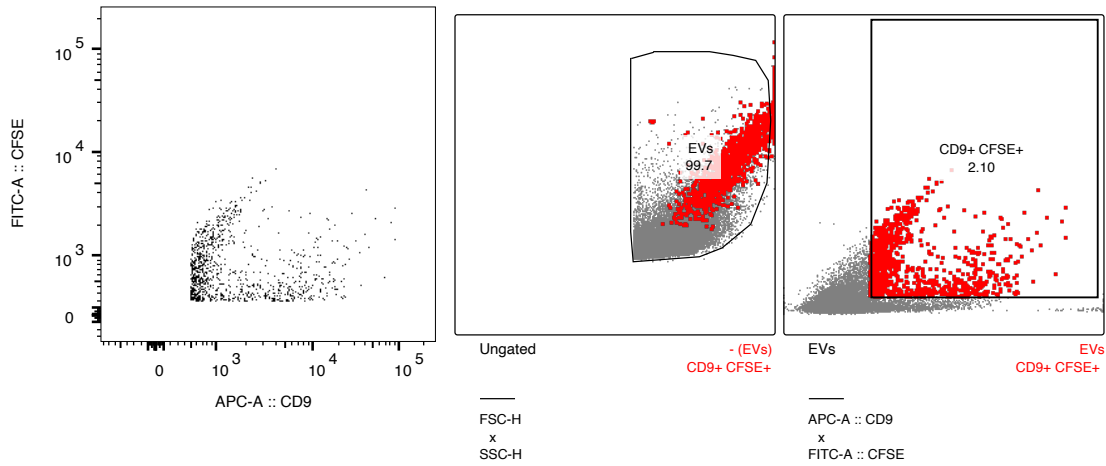

| Sample Name                               | Freq. of EVs |
|-------------------------------------------|--------------|
| Specimen_001_57-2D (IGG staining)_018.fcs | 2.10         |

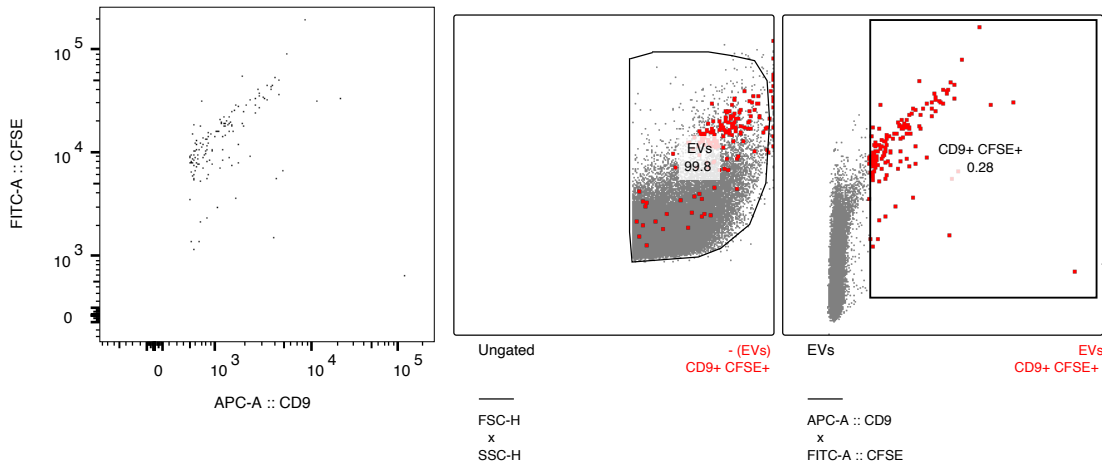

| Sample Name                              | Freq. of EVs |
|------------------------------------------|--------------|
| Specimen_001_21-3D (EV staining)_003.fcs | 0.28         |

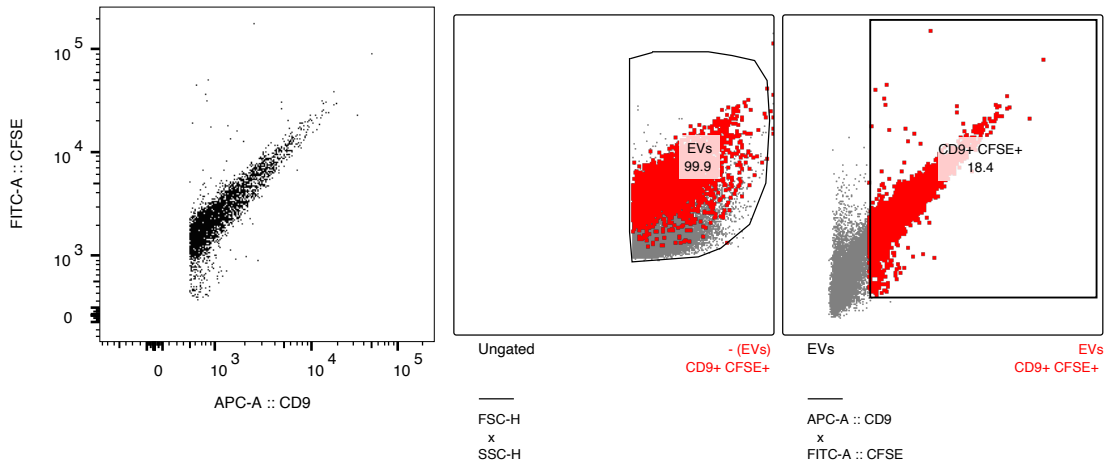

| Sample Name                               | Freq. of EVs |
|-------------------------------------------|--------------|
| Specimen_001_337-3D (EV staining)_011.fcs | 18.4         |

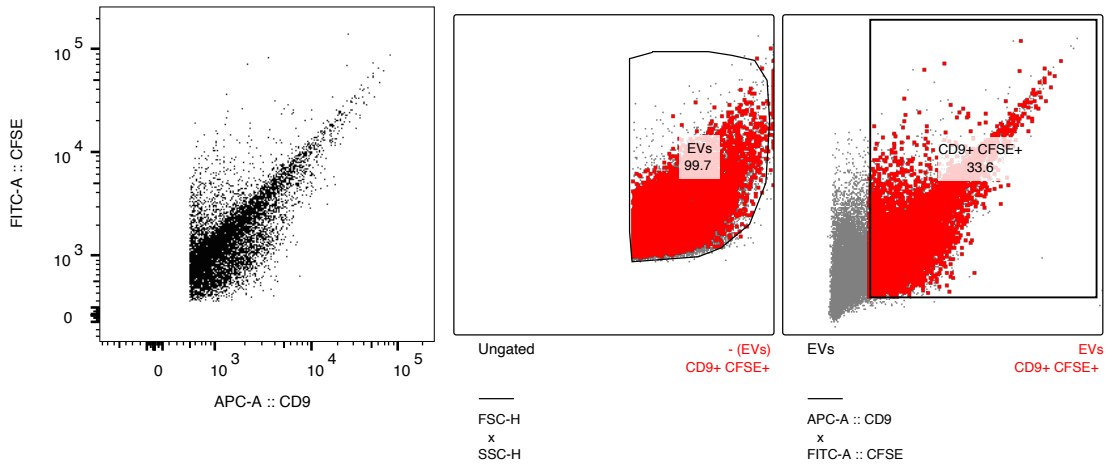

| Sample Name                              | Freq. of EVs |
|------------------------------------------|--------------|
| Specimen_001_57-3D (EV staining)_019.fcs | 33.6         |

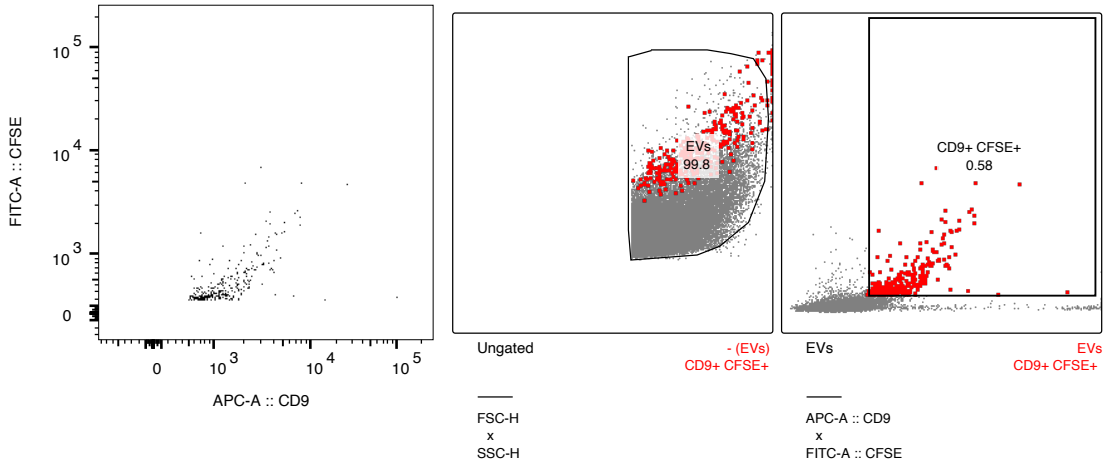

| Sample Name                               | Freq. of EVs |
|-------------------------------------------|--------------|
| Specimen_001_21-3D (IgG staining)_004.fcs | 0.58         |

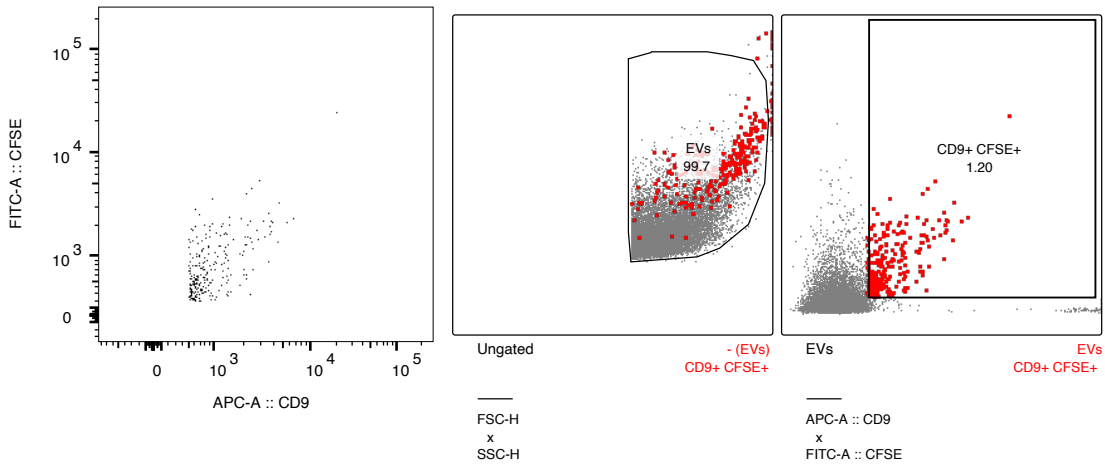

| Sample Name                                | Freq. of EVs |
|--------------------------------------------|--------------|
| Specimen_001_337-3D (IGG staining)_012.fcs | 1.20         |

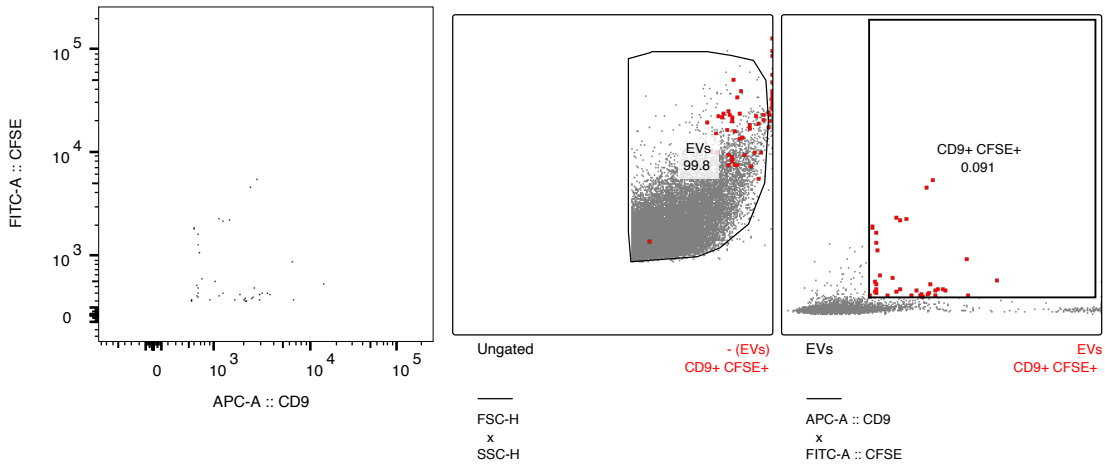

| Sample Name                               | Freq. of EVs |
|-------------------------------------------|--------------|
| Specimen_001_57-3D (IGG staining)_020.fcs | 0.091        |

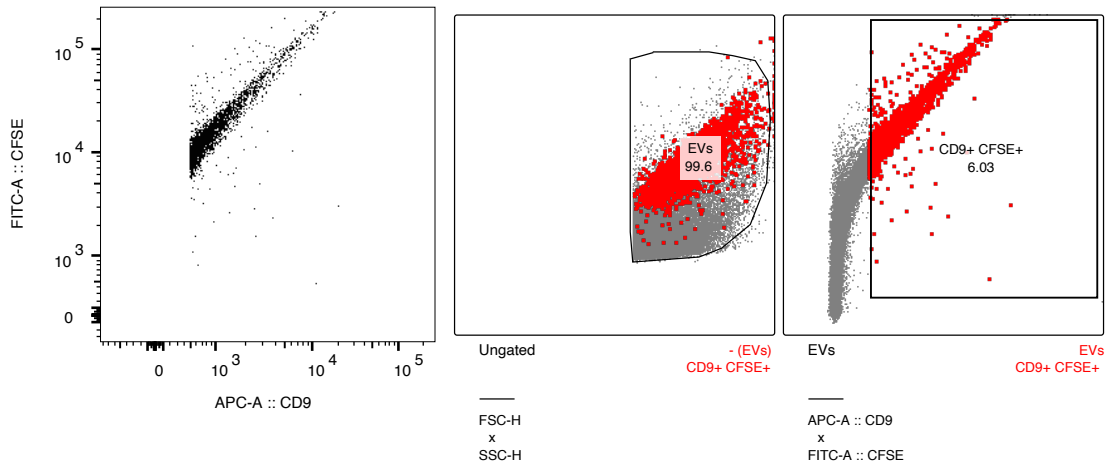

| Sample Name                              | Freq. of EVs |
|------------------------------------------|--------------|
| Specimen_001_27-2D (EV staining)_005.fcs | 6.03         |

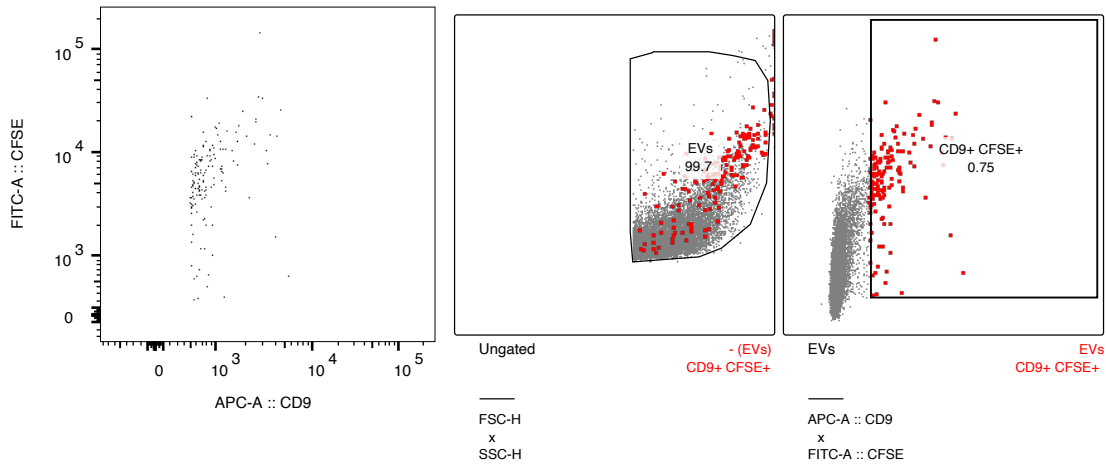

| Sample Name                               | Freq. of EVs |
|-------------------------------------------|--------------|
| Specimen_001_344-2D (EV staining)_013.fcs | 0.75         |

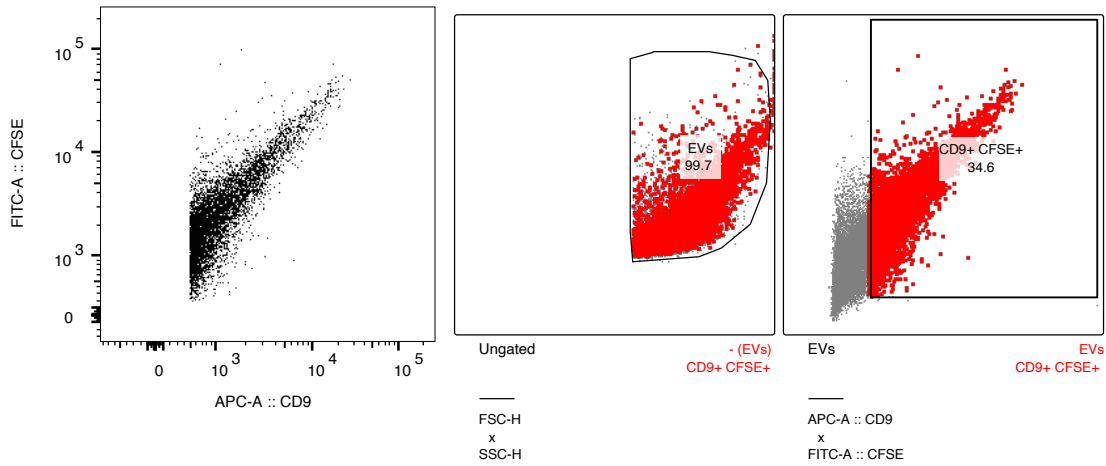

| Sample Name                                | Freq. of EVs |
|--------------------------------------------|--------------|
| Specimen_001_NP25-2D (EV staining)_021.fcs | 34.6         |

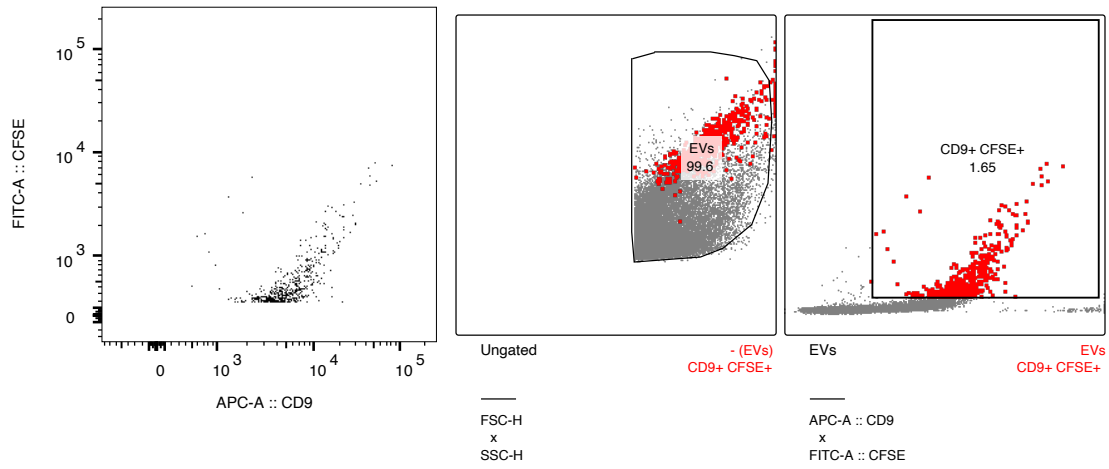

| Sample Name                               | Freq. of EVs |
|-------------------------------------------|--------------|
| Specimen_001_27-2D (IgG staining)_006.fcs | 1.65         |

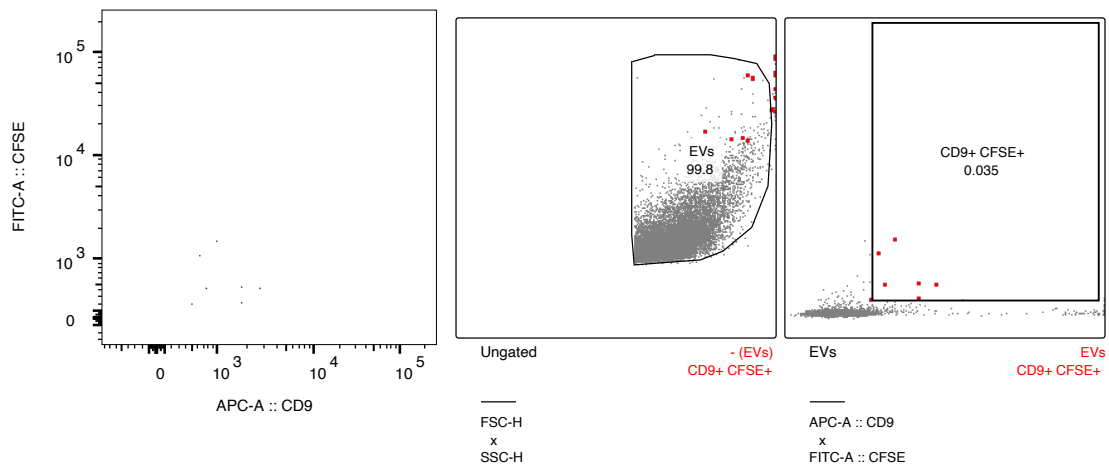

| Sample Name                                | Freq. of EVs |
|--------------------------------------------|--------------|
| Specimen_001_344-2D (IGG staining)_014.fcs | 0.035        |

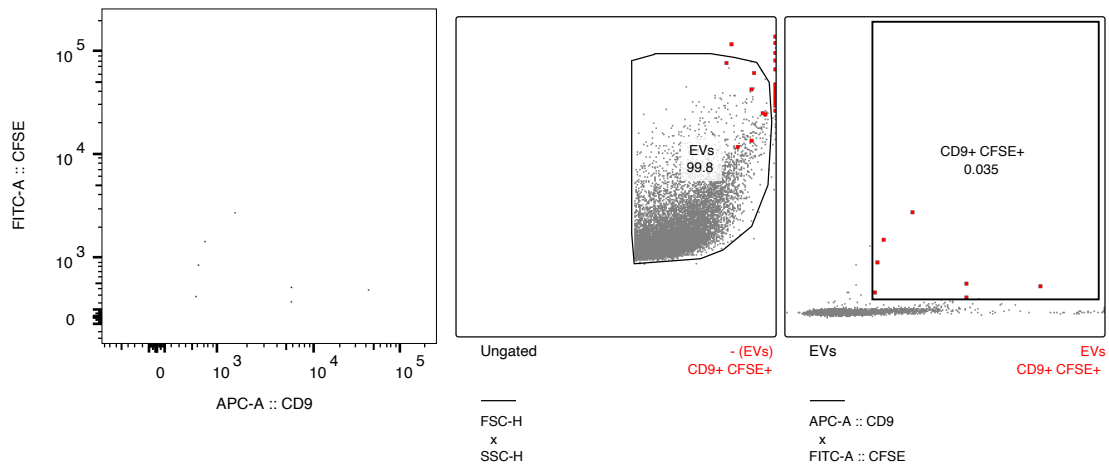

| Sample Name                                 | Freq. of EVs |
|---------------------------------------------|--------------|
| Specimen_001_NP25-2D (IGG staining)_022.fcs | 0.035        |

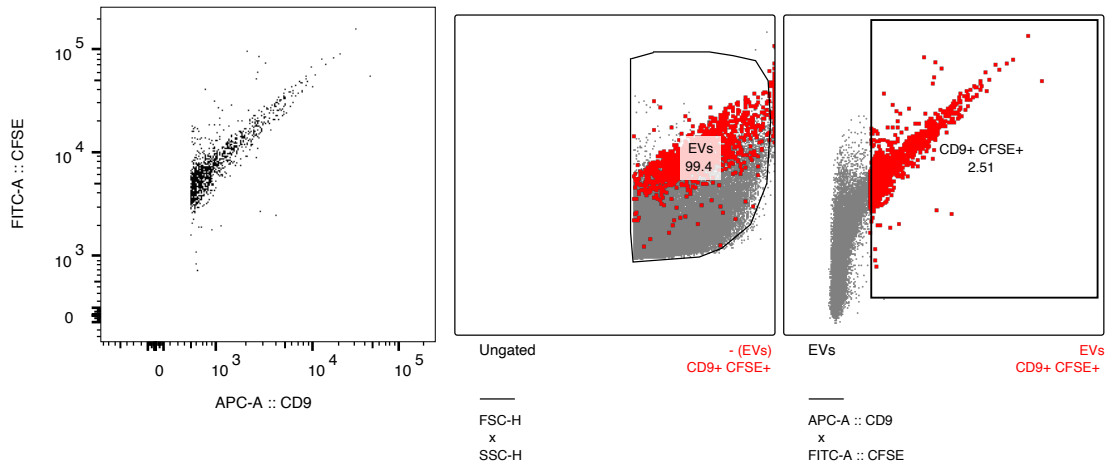

| Sample Name                              | Freq. of EVs |
|------------------------------------------|--------------|
| Specimen_001_27-3D (EV staining)_007.fcs | 2.51         |

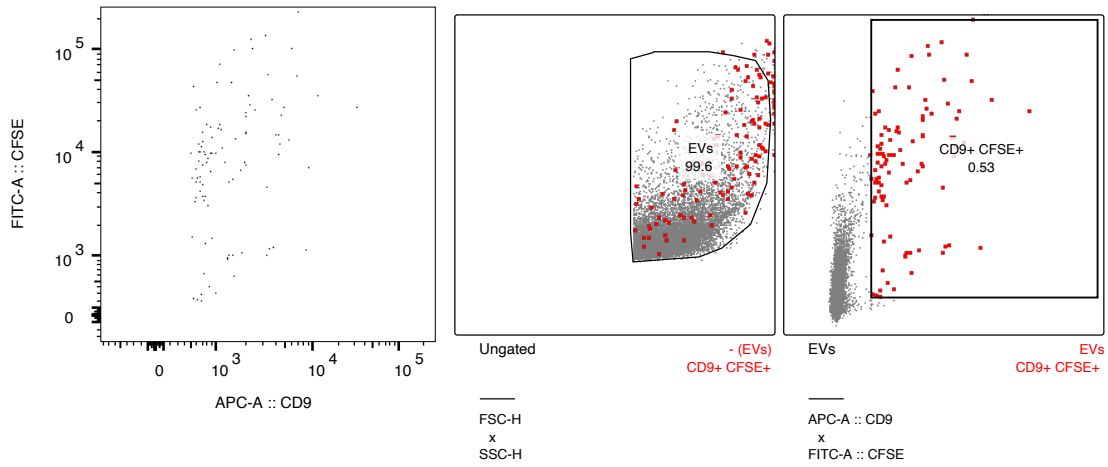

| Sample Name                               | Freq. of EVs |
|-------------------------------------------|--------------|
| Specimen_001_344-3D (EV staining)_015.fcs | 0.53         |

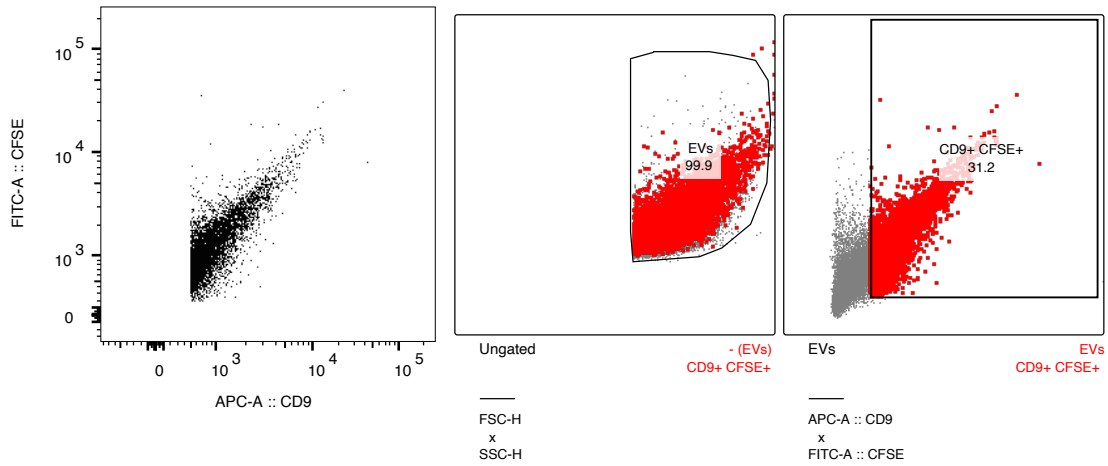

| Sample Name                                | Freq. of EVs |
|--------------------------------------------|--------------|
| Specimen_001_NP25-3D (EV staining)_023.fcs | 31.2         |



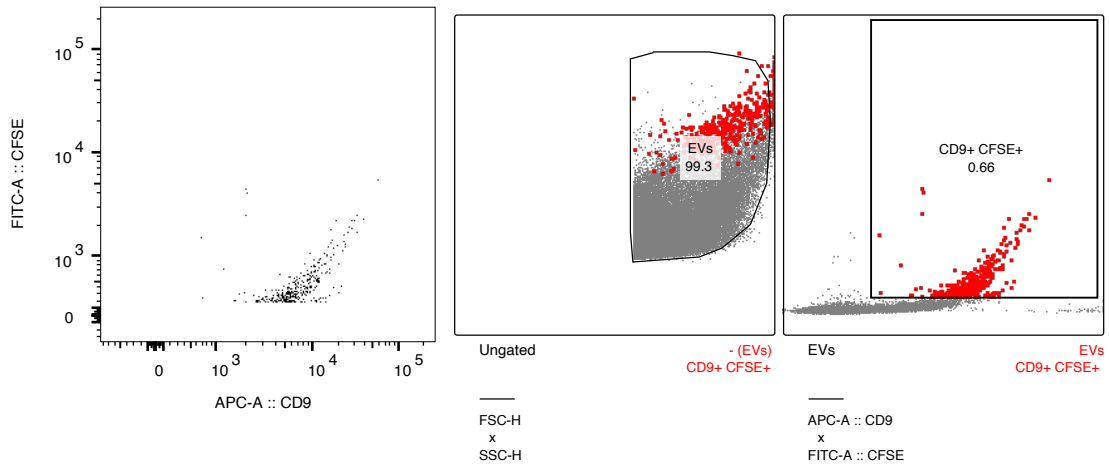

| Sample Name                               | Freq. of EVs |
|-------------------------------------------|--------------|
| Specimen_001_27-3D (IgG staining)_008.fcs | 0.66         |

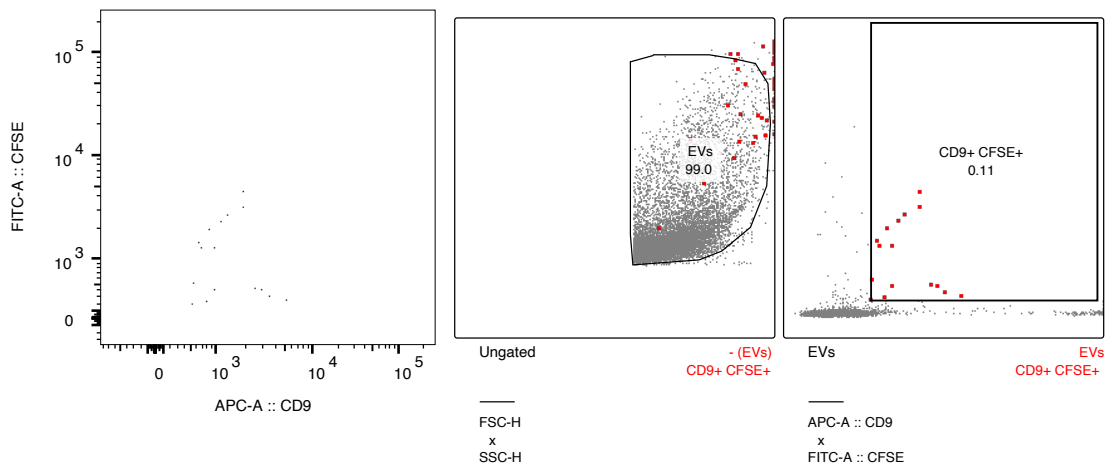

| Sample Name                                | Freq. of EVs |
|--------------------------------------------|--------------|
| Specimen_001_344-3D (IGG staining)_016.fcs | 0.11         |

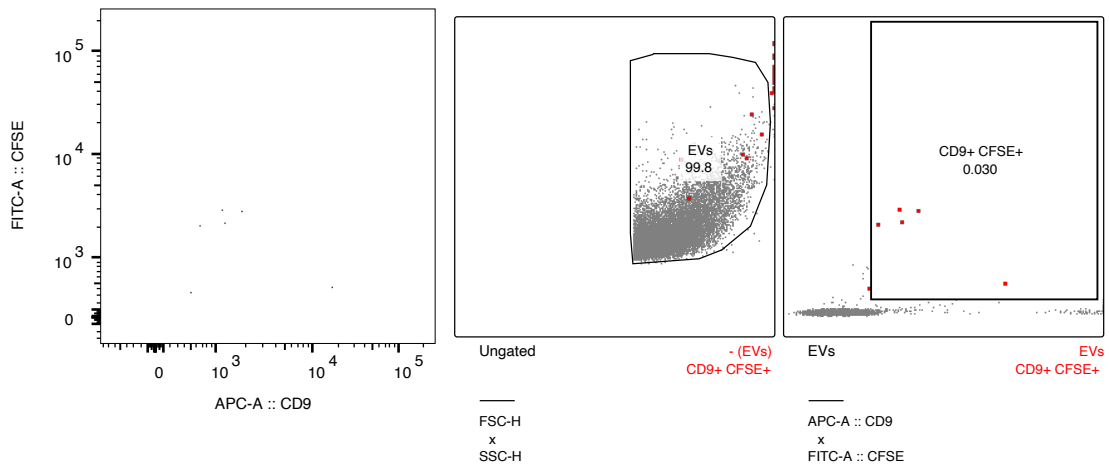

| Sample Name                                 | Freq. of EVs |
|---------------------------------------------|--------------|
| Specimen_001_NP25-3D (IGG staining)_024.fcs | 0.030        |



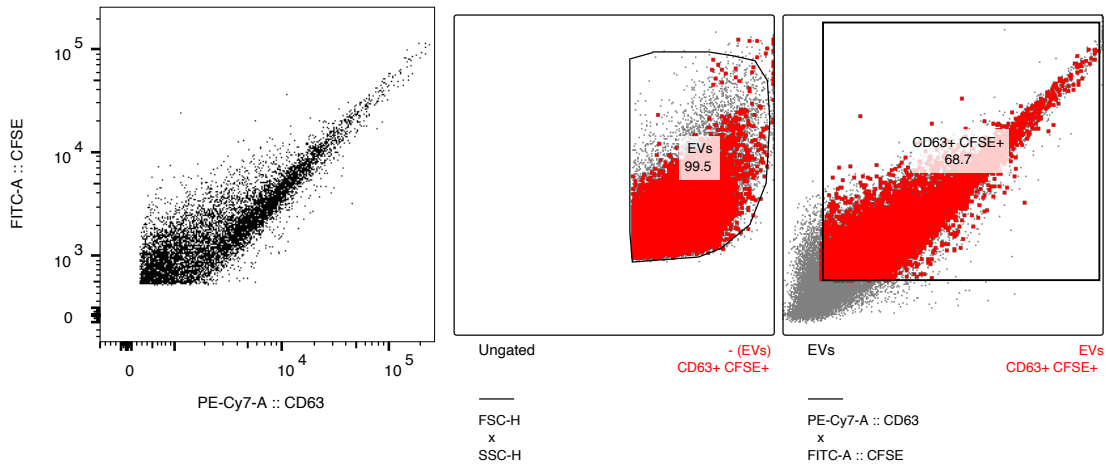

| Sample Name                              | Freq. of EVs |
|------------------------------------------|--------------|
| Specimen_001_21-2D (EV staining)_001.fcs | 68.7         |

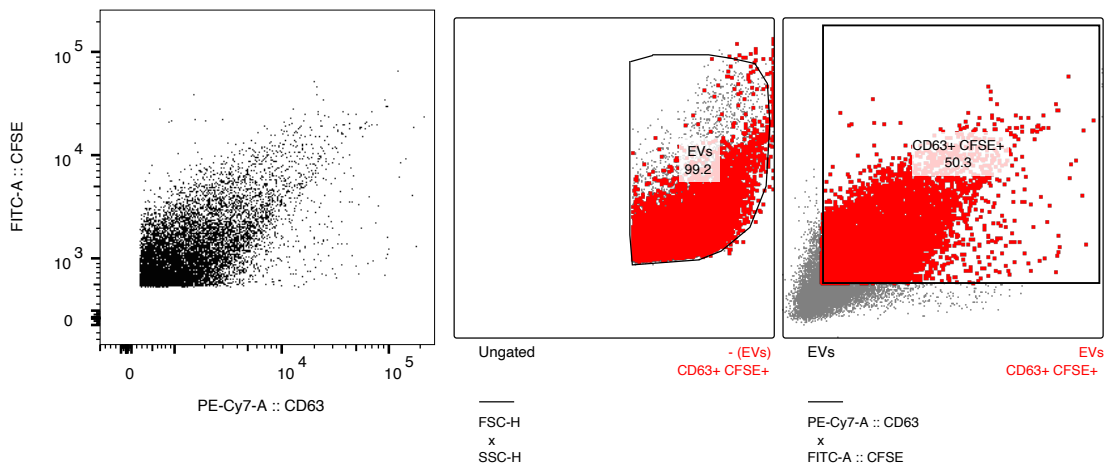

| Sample Name                               | Freq. of EVs |
|-------------------------------------------|--------------|
| Specimen_001_337-2D (EV staining)_009.fcs | 50.3         |

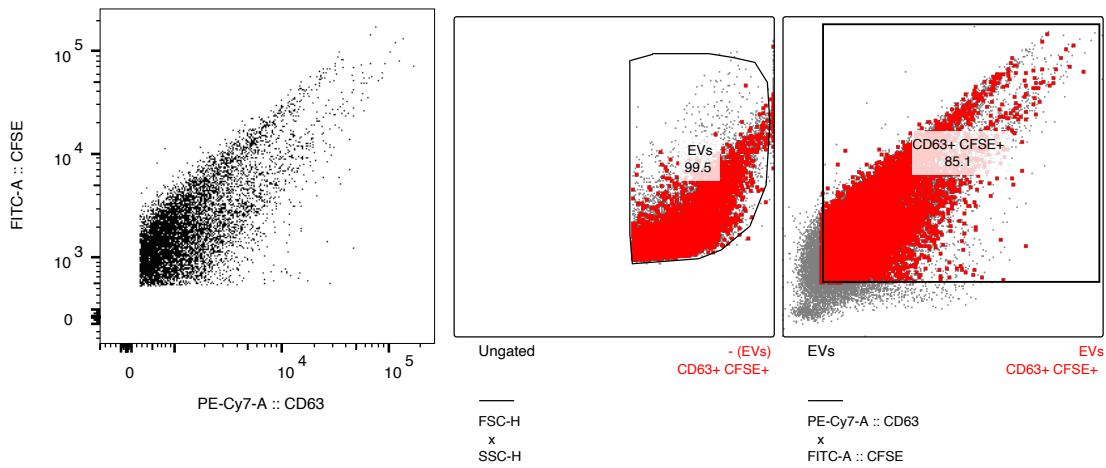

| Sample Name                              | Freq. of EVs |
|------------------------------------------|--------------|
| Specimen_001_57-2D (EV staining)_017.fcs | 85.1         |

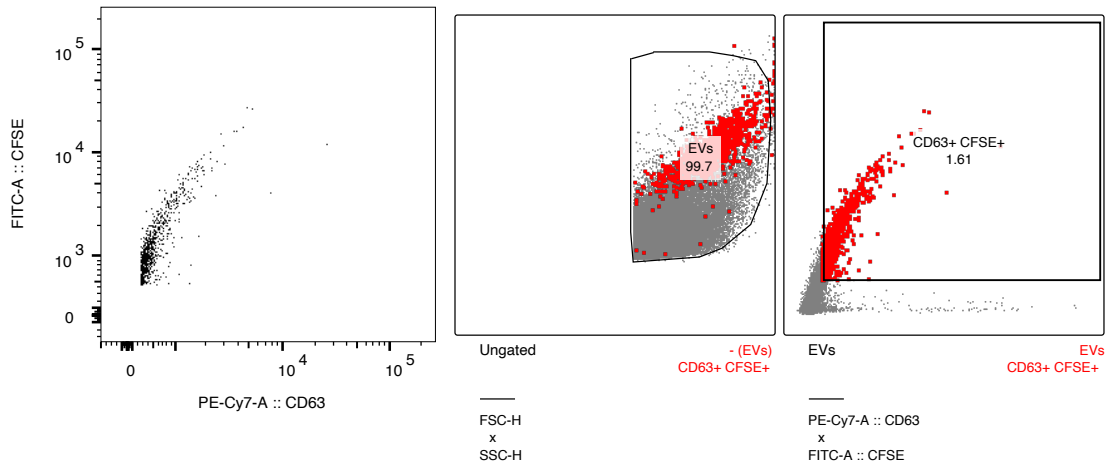

| Sample Name                               | Freq. of EVs |
|-------------------------------------------|--------------|
| Specimen_001_21-2D (IgG staining)_002.fcs | 1.61         |

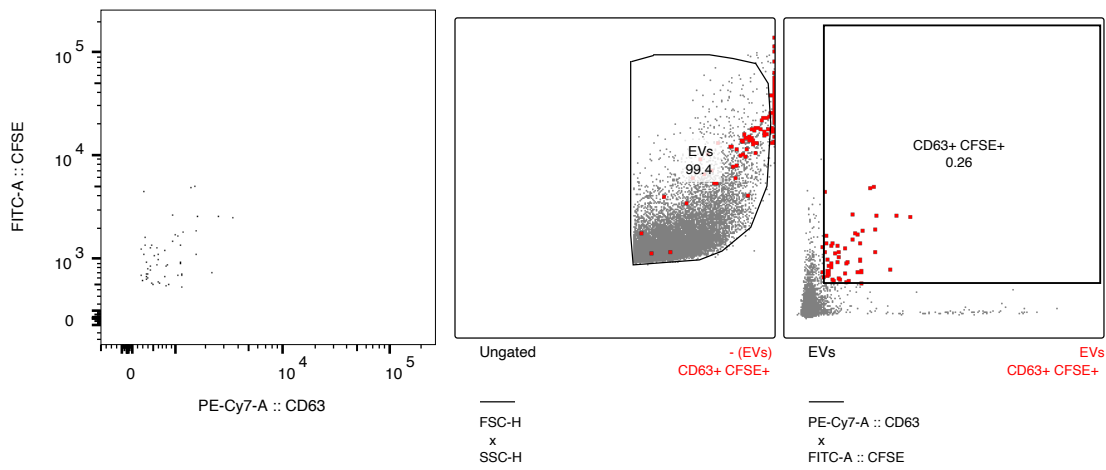

| Sample Name                                | Freq. of EVs |
|--------------------------------------------|--------------|
| Specimen_001_337-2D (IGG staining)_010.fcs | 0.26         |

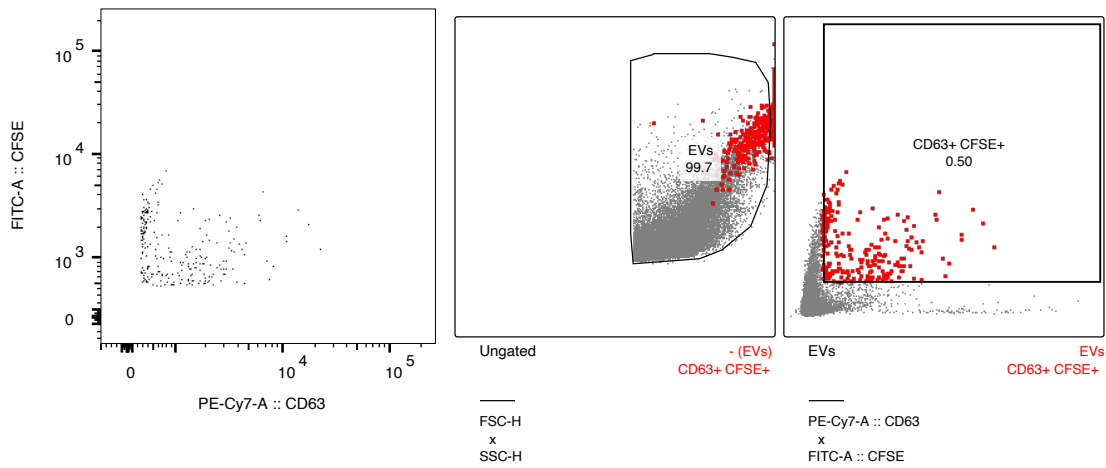

| Sample Name                               | Freq. of EVs |
|-------------------------------------------|--------------|
| Specimen_001_57-2D (IGG staining)_018.fcs | 0.50         |

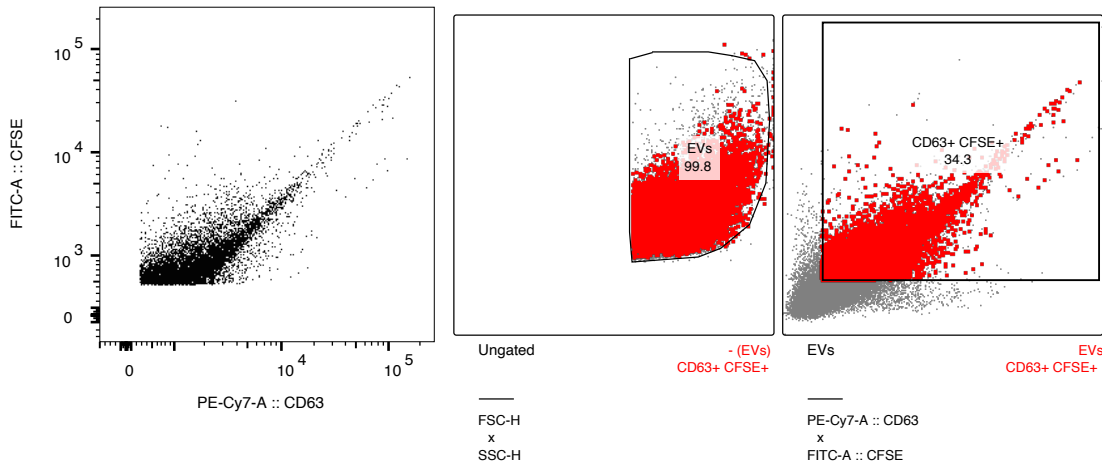

| Sample Name                              | Freq. of EVs |
|------------------------------------------|--------------|
| Specimen_001_21-3D (EV staining)_003.fcs | 34.3         |

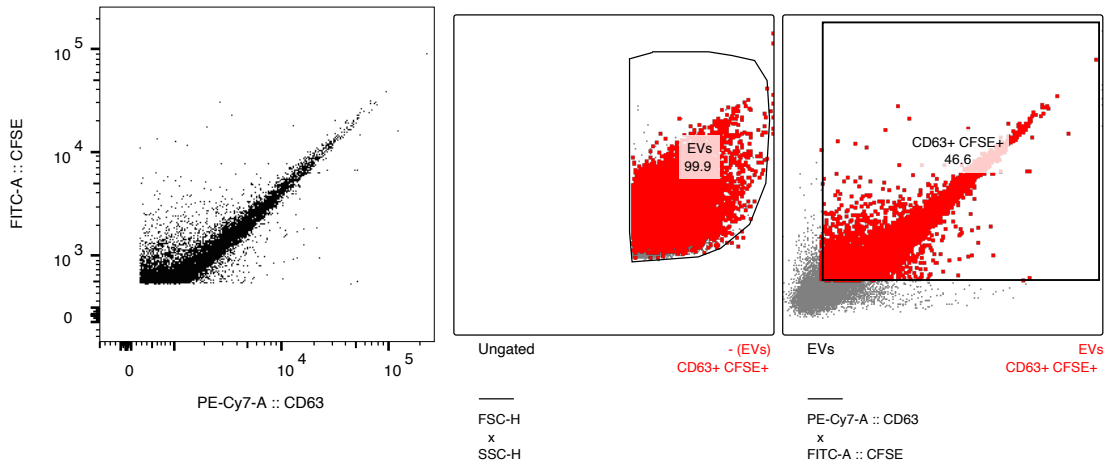

| Sample Name                               | Freq. of EVs |
|-------------------------------------------|--------------|
| Specimen_001_337-3D (EV staining)_011.fcs | 46.6         |

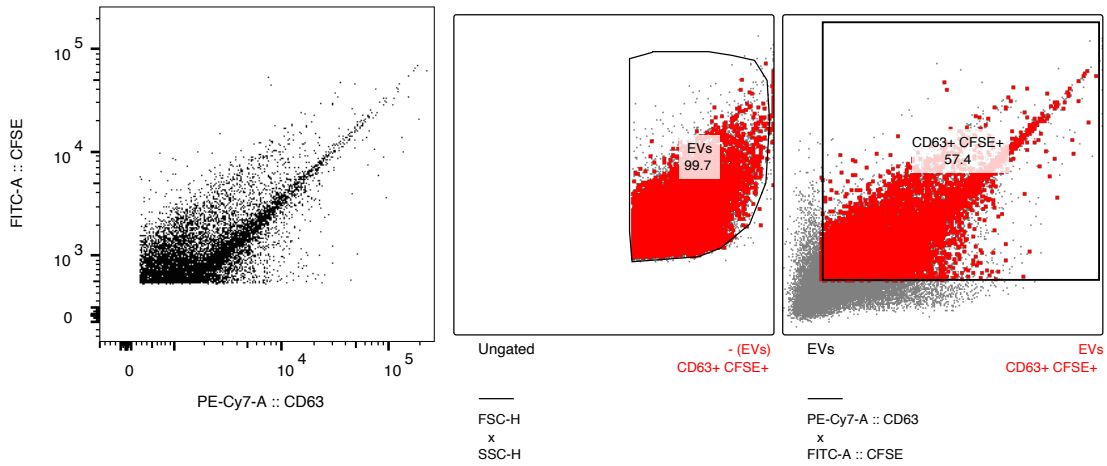

| Sample Name                              | Freq. of EVs |
|------------------------------------------|--------------|
| Specimen_001_57-3D (EV staining)_019.fcs | 57.4         |

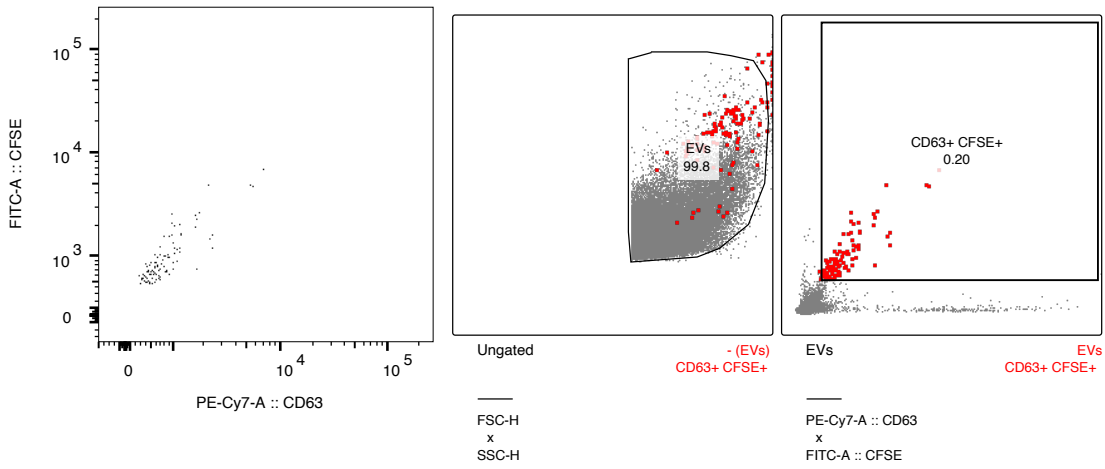

| Sample Name                               | Freq. of EVs |
|-------------------------------------------|--------------|
| Specimen_001_21-3D (IgG staining)_004.fcs | 0.20         |

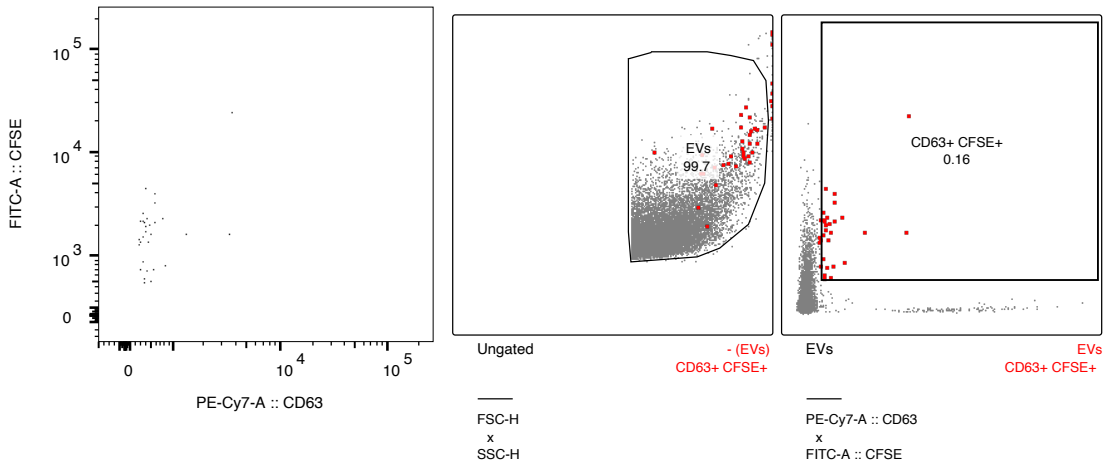

| Sample Name                                | Freq. of EVs |
|--------------------------------------------|--------------|
| Specimen_001_337-3D (IGG staining)_012.fcs | 0.16         |

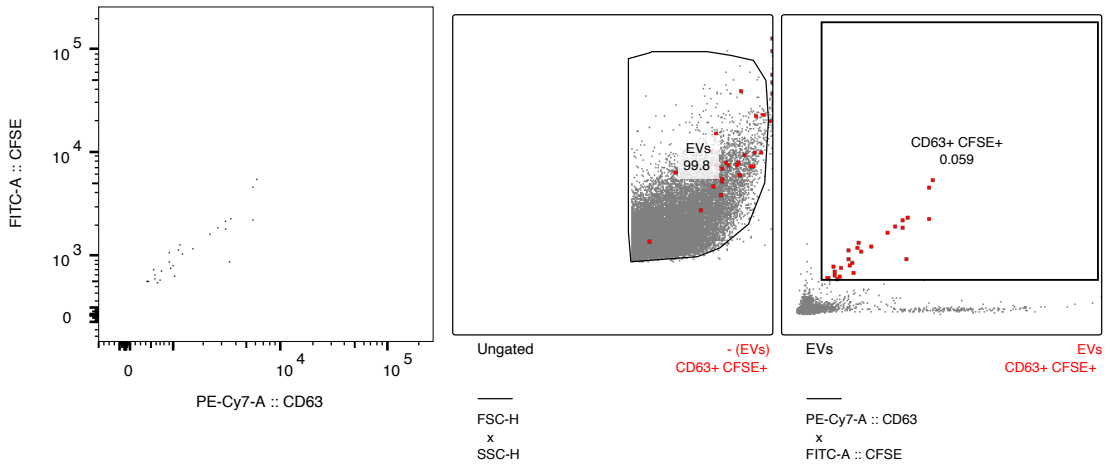

| Sample Name                               | Freq. of EVs |
|-------------------------------------------|--------------|
| Specimen_001_57-3D (IGG staining)_020.fcs | 0.059        |

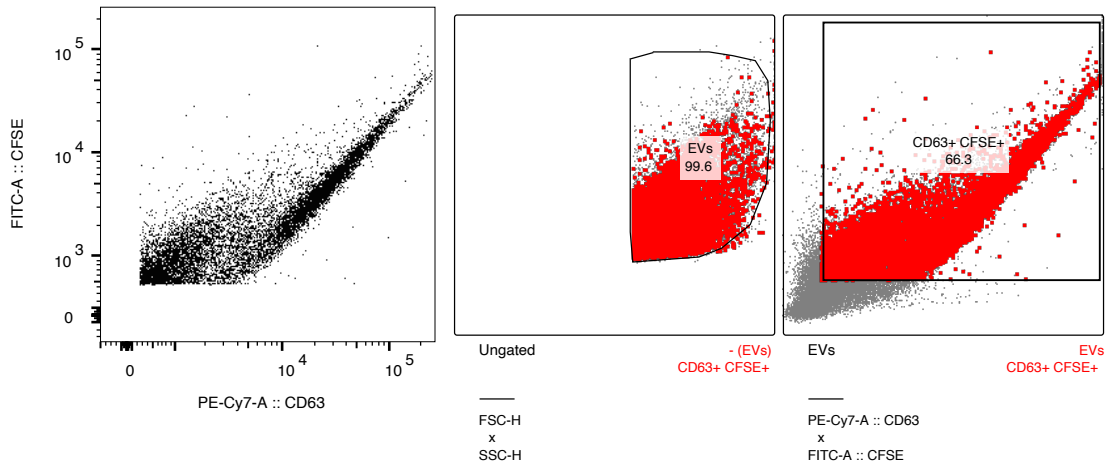

| Sample Name                              | Freq. of EVs |
|------------------------------------------|--------------|
| Specimen_001_27-2D (EV staining)_005.fcs | 66.3         |

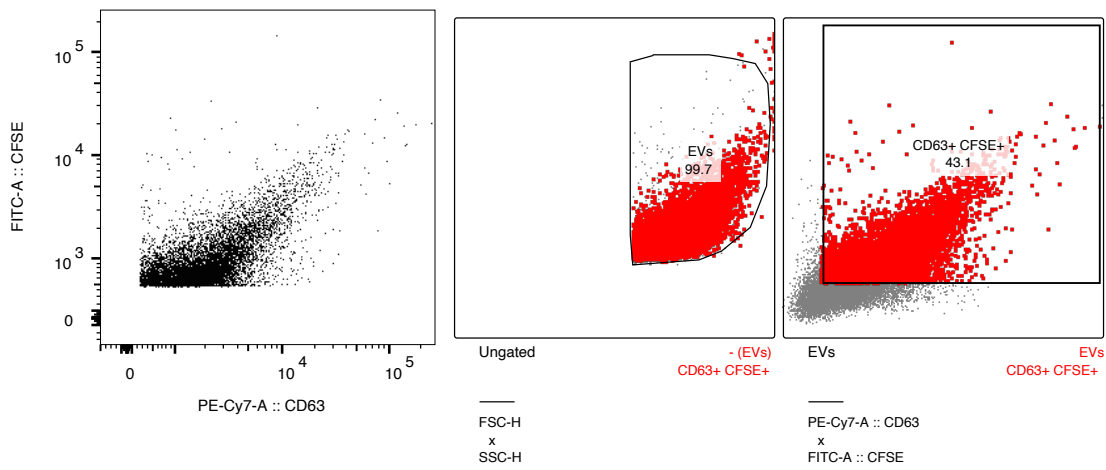

| Sample Name                               | Freq. of EVs |
|-------------------------------------------|--------------|
| Specimen_001_344-2D (EV staining)_013.fcs | 43.1         |

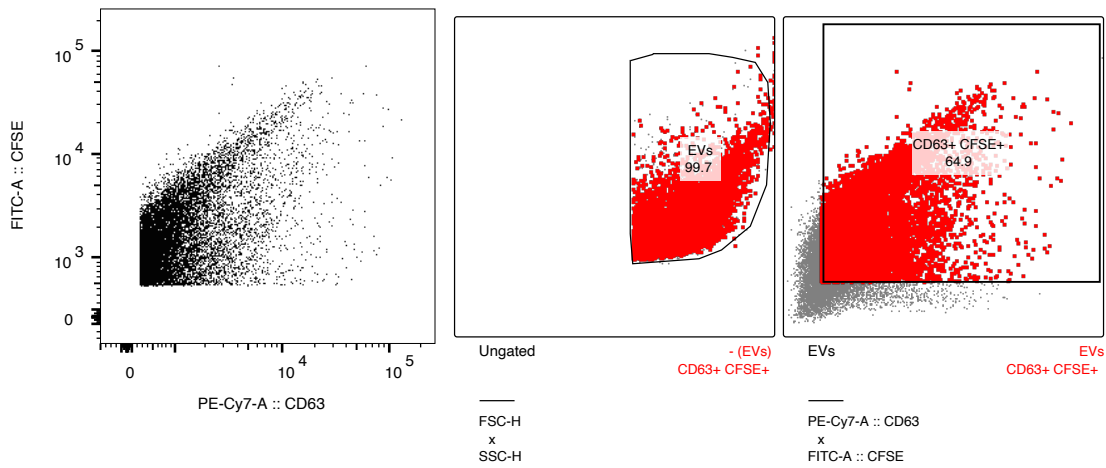

| Sample Name                                | Freq. of EVs |
|--------------------------------------------|--------------|
| Specimen_001_NP25-2D (EV staining)_021.fcs | 64.9         |

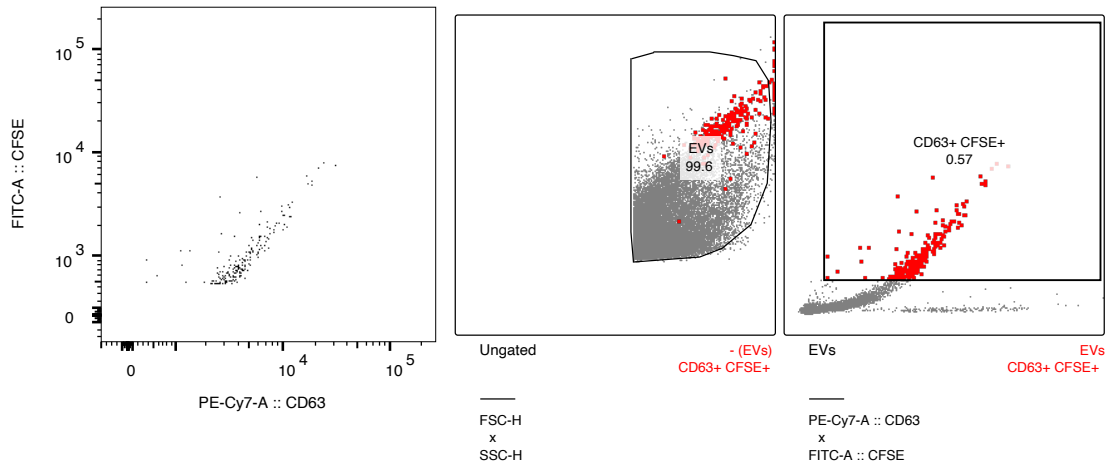

| Sample Name                               | Freq. of EVs |
|-------------------------------------------|--------------|
| Specimen_001_27-2D (IgG staining)_006.fcs | 0.57         |

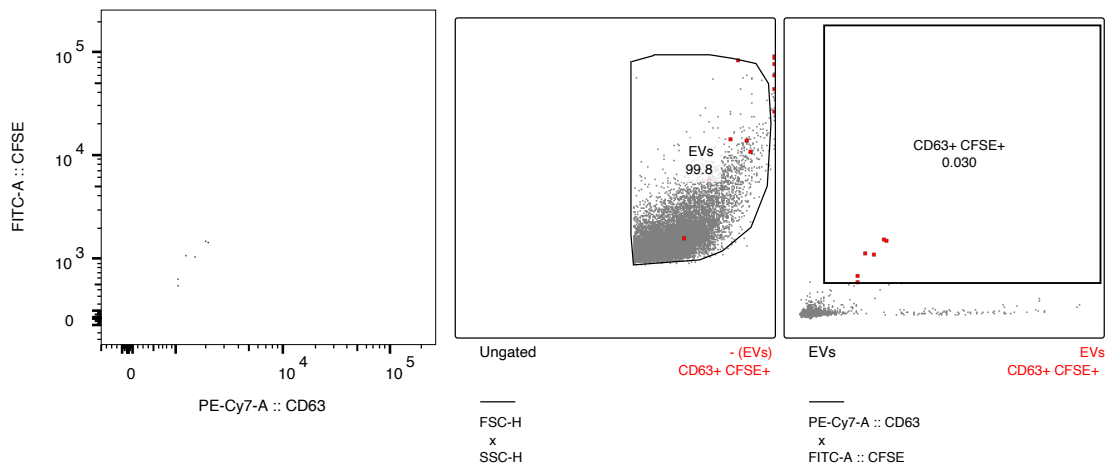

| Sample Name                                | Freq. of EVs |
|--------------------------------------------|--------------|
| Specimen_001_344-2D (IGG staining)_014.fcs | 0.030        |

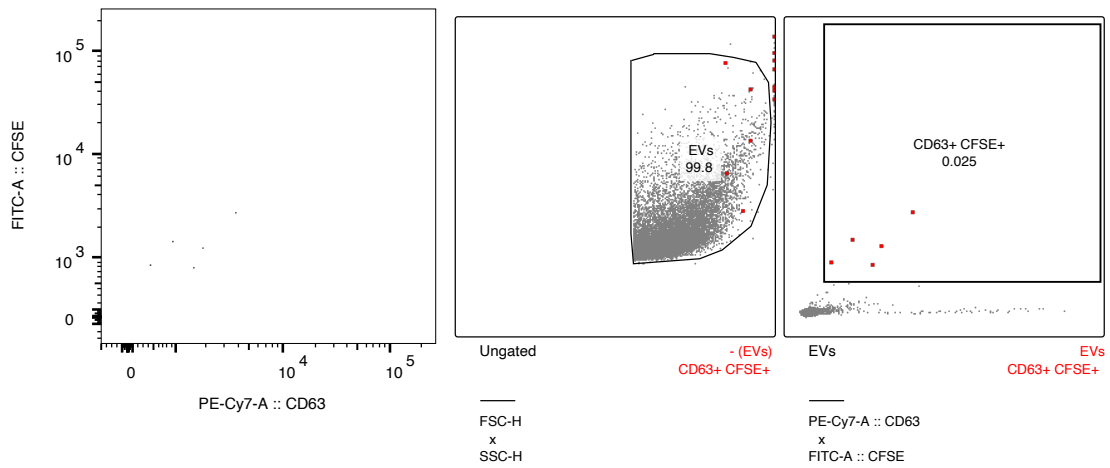

| Sample Name                                 | Freq. of EVs |
|---------------------------------------------|--------------|
| Specimen_001_NP25-2D (IGG staining)_022.fcs | 0.025        |



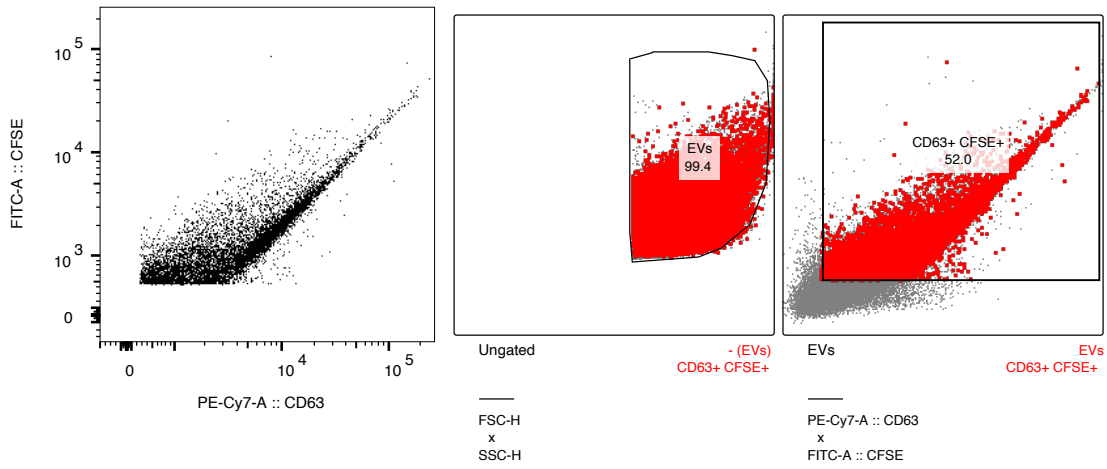

| Sample Name                              | Freq. of EVs |
|------------------------------------------|--------------|
| Specimen_001_27-3D (EV staining)_007.fcs | 52.0         |

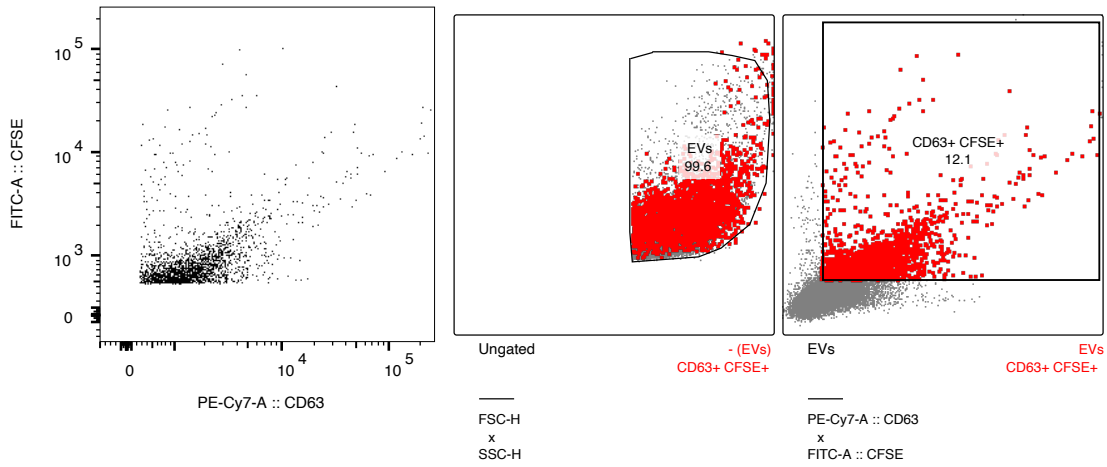

| Sample Name                               | Freq. of EVs |
|-------------------------------------------|--------------|
| Specimen_001_344-3D (EV staining)_015.fcs | 12.1         |

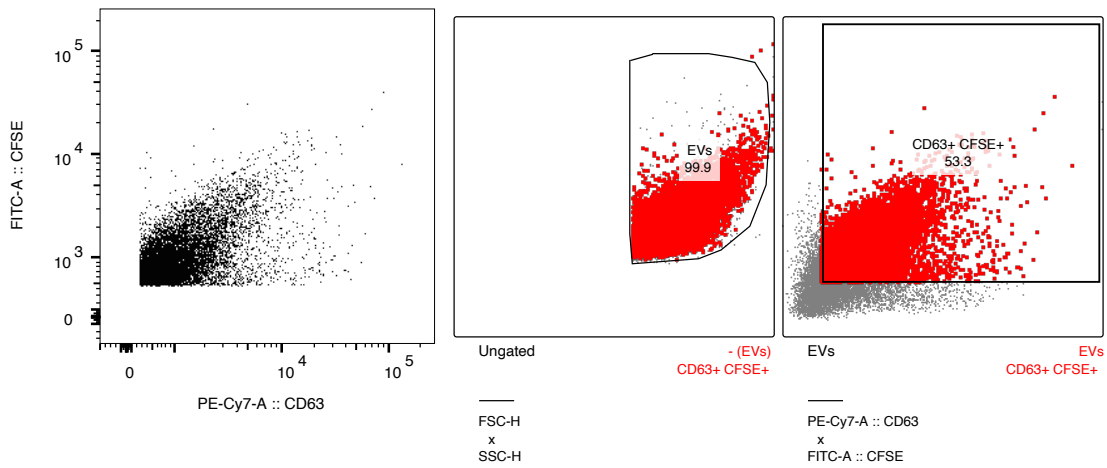

| Sample Name                                | Freq. of EVs |
|--------------------------------------------|--------------|
| Specimen_001_NP25-3D (EV staining)_023.fcs | 53.3         |

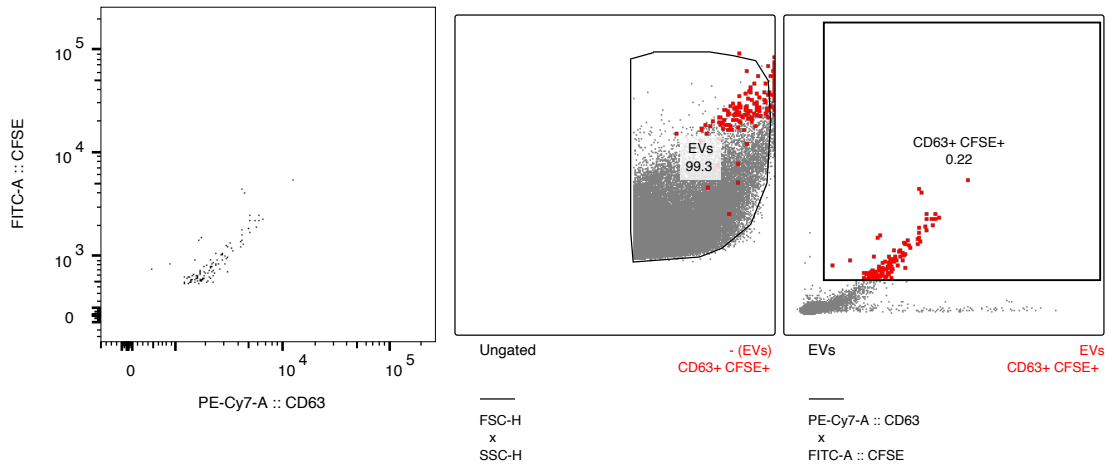

| Sample Name                               | Freq. of EVs |
|-------------------------------------------|--------------|
| Specimen_001_27-3D (IgG staining)_008.fcs | 0.22         |

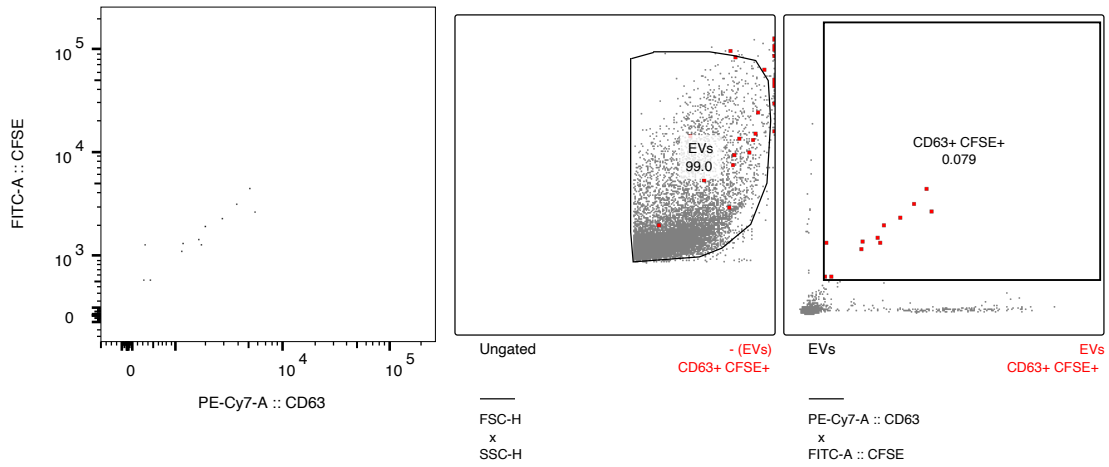

| Sample Name                                | Freq. of EVs |
|--------------------------------------------|--------------|
| Specimen_001_344-3D (IGG staining)_016.fcs | 0.079        |

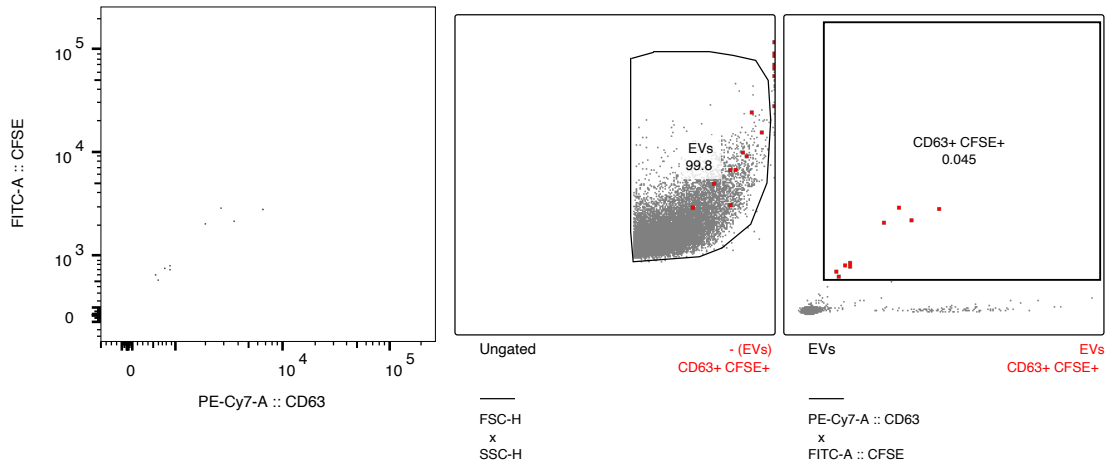

| Sample Name                                 | Freq. of EVs |
|---------------------------------------------|--------------|
| Specimen_001_NP25-3D (IGG staining)_024.fcs | 0.045        |



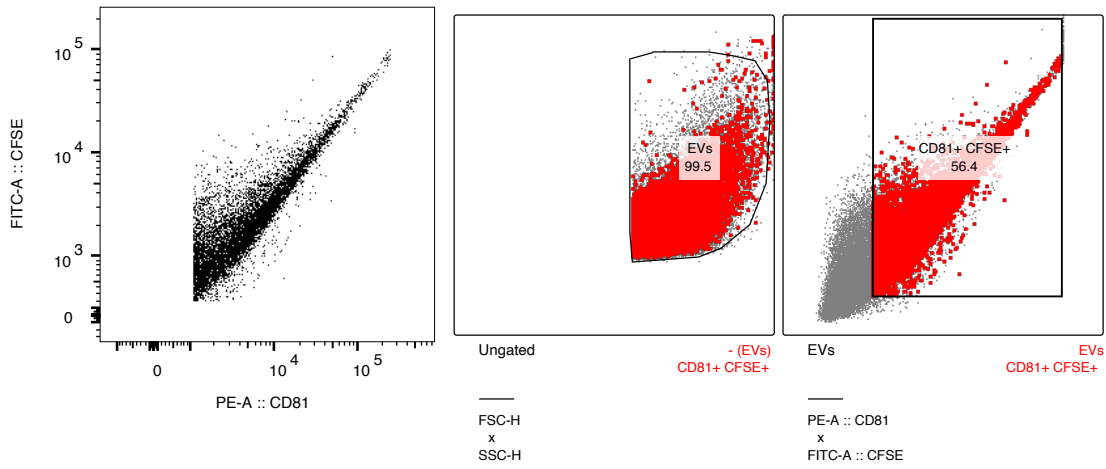

| Sample Name                              | Freq. of EVs |
|------------------------------------------|--------------|
| Specimen_001_21-2D (EV staining)_001.fcs | 56.4         |

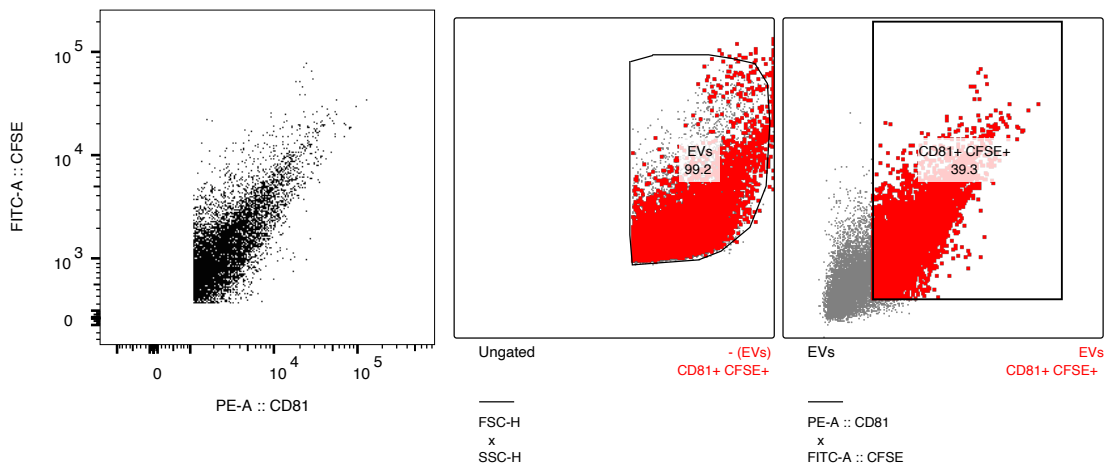

| Sample Name                               | Freq. of EVs |
|-------------------------------------------|--------------|
| Specimen_001_337-2D (EV staining)_009.fcs | 39.3         |

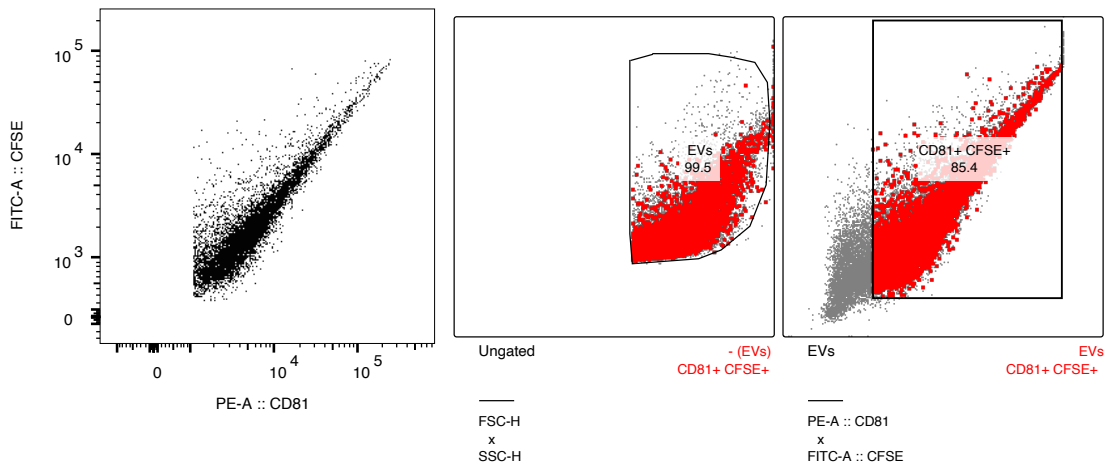

| Sample Name                              | Freq. of EVs |
|------------------------------------------|--------------|
| Specimen_001_57-2D (EV staining)_017.fcs | 85.4         |

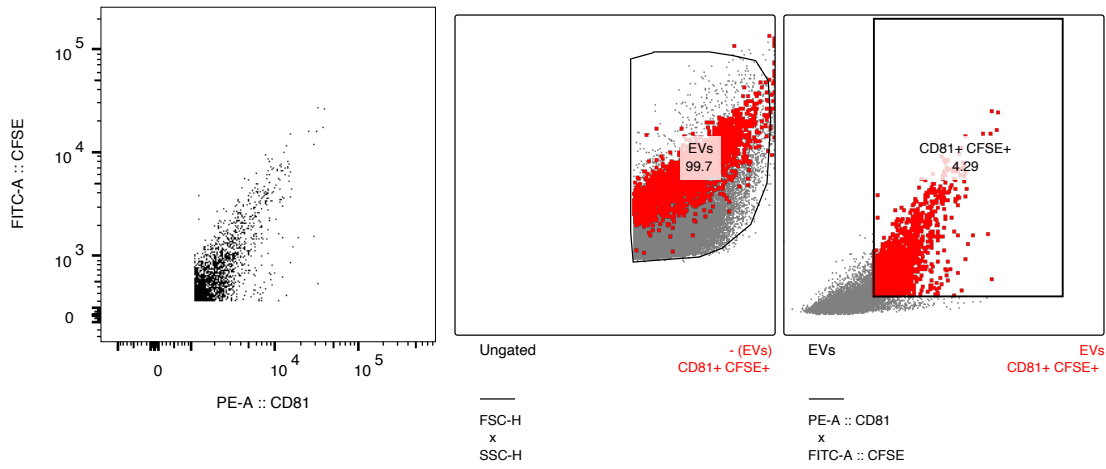

| Sample Name                               | Freq. of EVs |
|-------------------------------------------|--------------|
| Specimen_001_21-2D (IgG staining)_002.fcs | 4.29         |

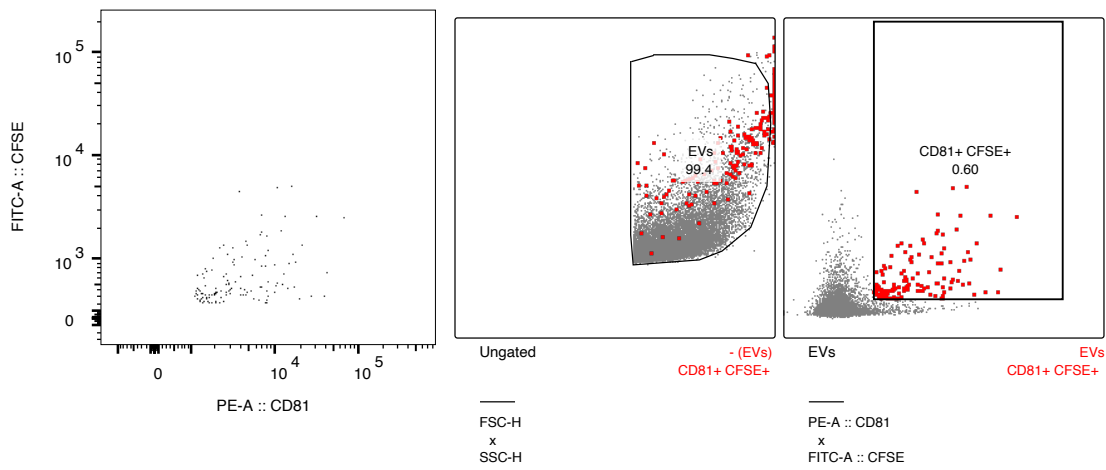

| Sample Name                                | Freq. of EVs |
|--------------------------------------------|--------------|
| Specimen_001_337-2D (IGG staining)_010.fcs | 0.60         |

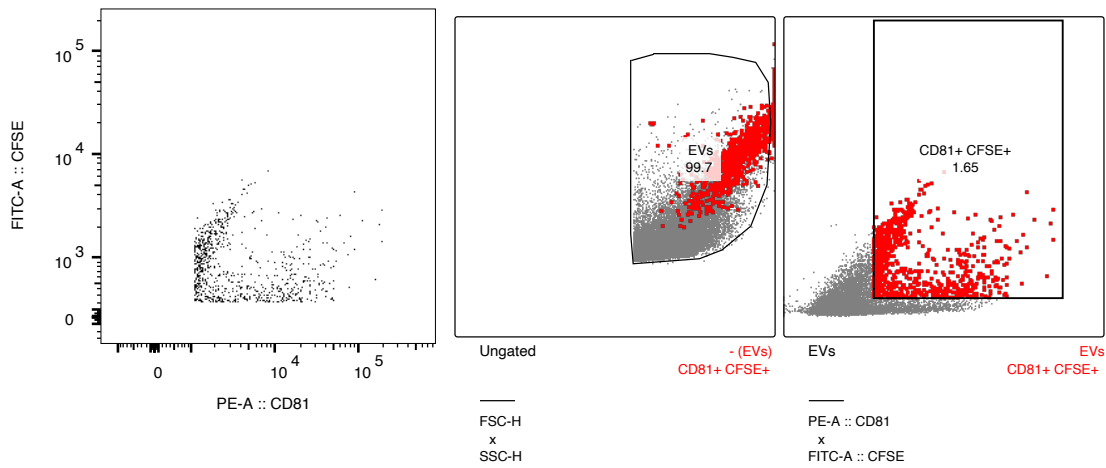

| Sample Name                               | Freq. of EVs |
|-------------------------------------------|--------------|
| Specimen_001_57-2D (IGG staining)_018.fcs | 1.65         |

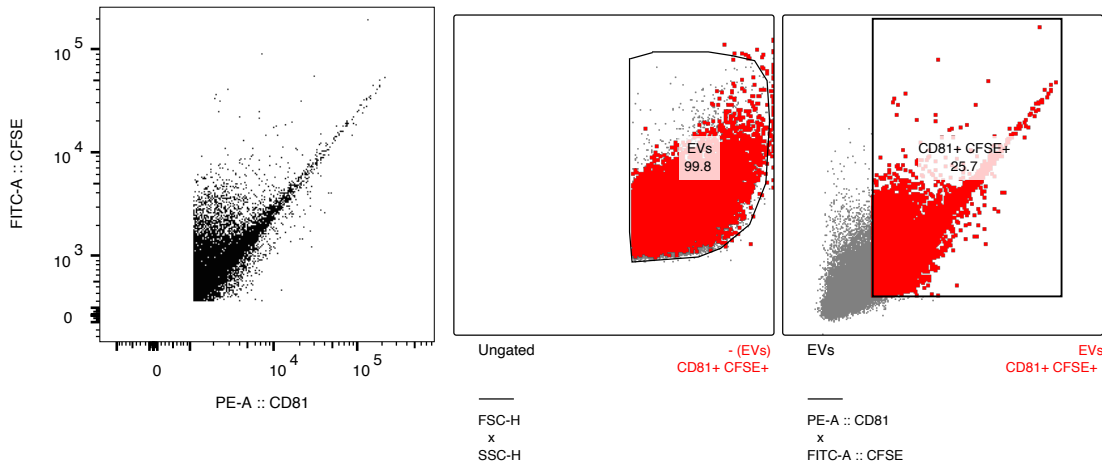

| Sample Name                              | Freq. of EVs |
|------------------------------------------|--------------|
| Specimen_001_21-3D (EV staining)_003.fcs | 25.7         |

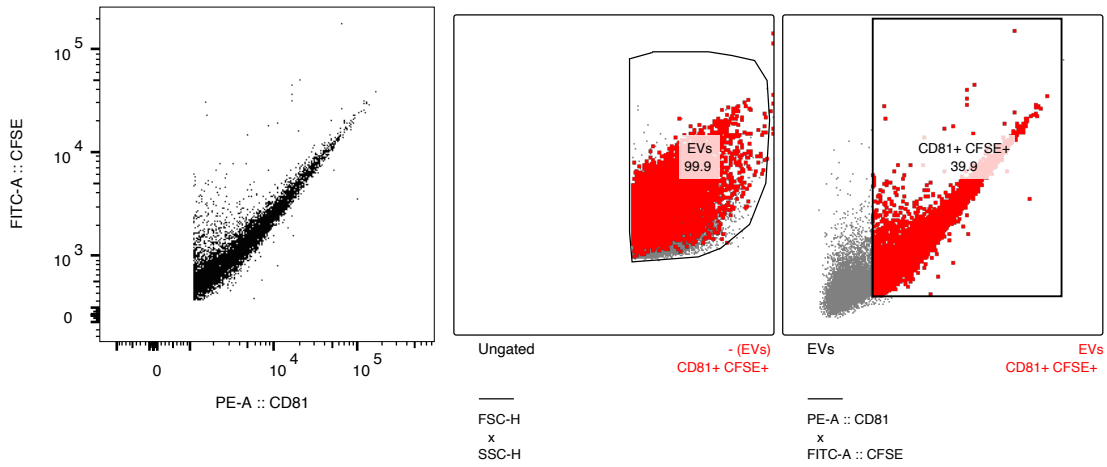

| Sample Name                               | Freq. of EVs |
|-------------------------------------------|--------------|
| Specimen_001_337-3D (EV staining)_011.fcs | 39.9         |

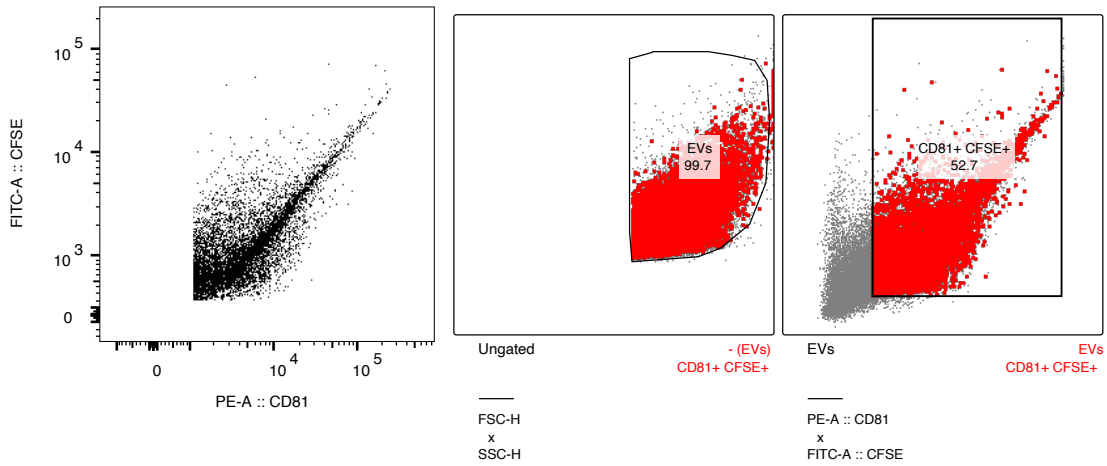

| Sample Name                              | Freq. of EVs |
|------------------------------------------|--------------|
| Specimen_001_57-3D (EV staining)_019.fcs | 52.7         |

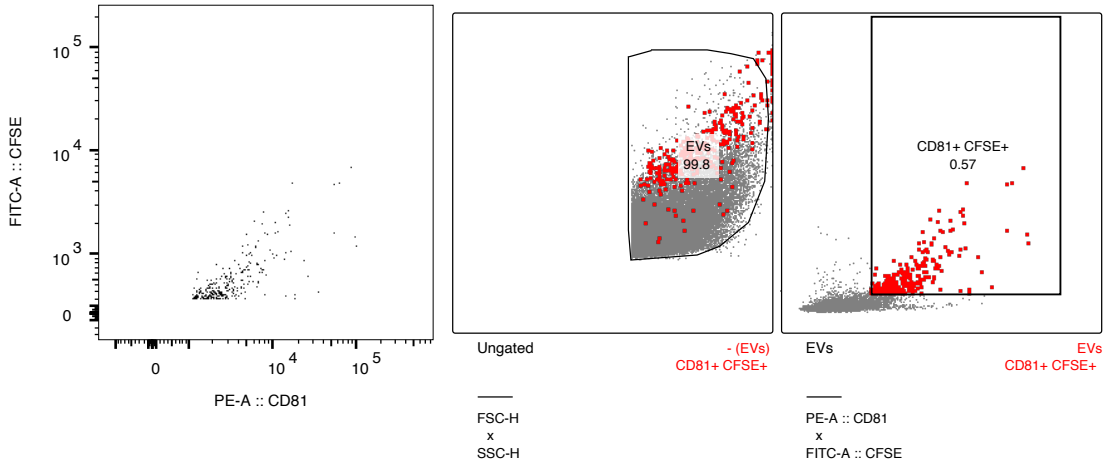

| Sample Name                               | Freq. of EVs |
|-------------------------------------------|--------------|
| Specimen_001_21-3D (IgG staining)_004.fcs | 0.57         |

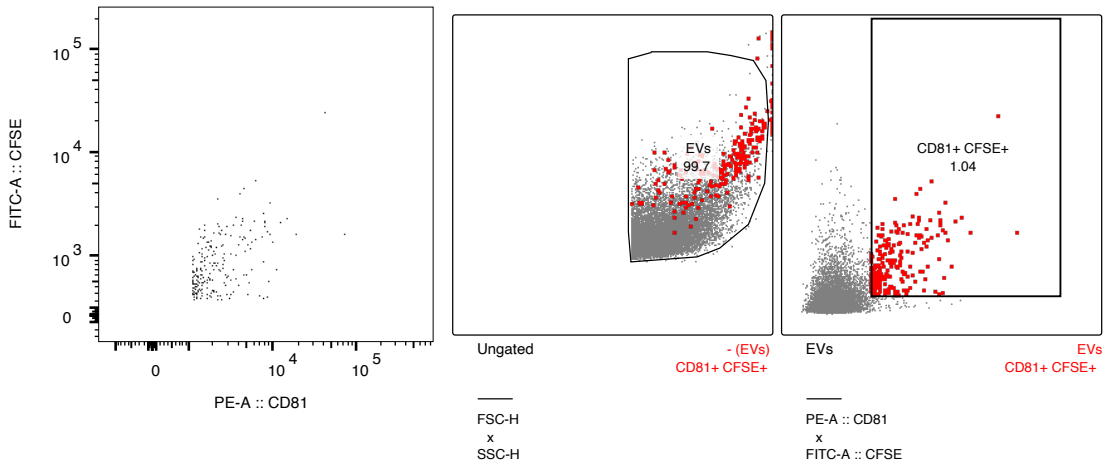

| Sample Name                                | Freq. of EVs |
|--------------------------------------------|--------------|
| Specimen_001_337-3D (IGG staining)_012.fcs | 1.04         |

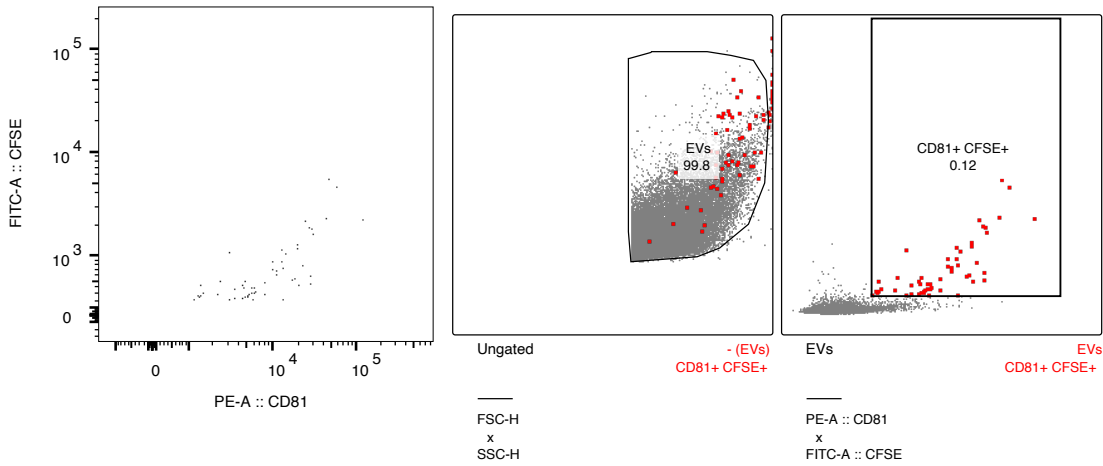

| Sample Name                               | Freq. of EVs |
|-------------------------------------------|--------------|
| Specimen_001_57-3D (IGG staining)_020.fcs | 0.12         |

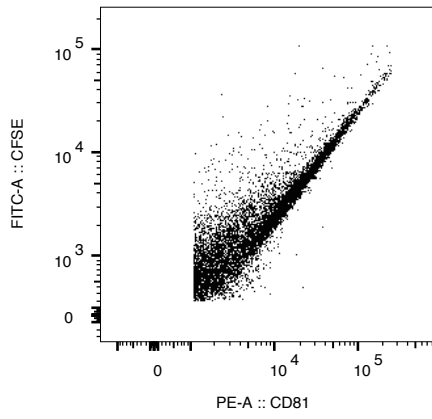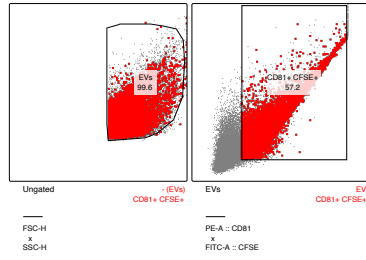

| Sample Name                              | Freq. of EVs |
|------------------------------------------|--------------|
| Specimen_001_27-2D (EV staining)_005.fcs | 57.2         |

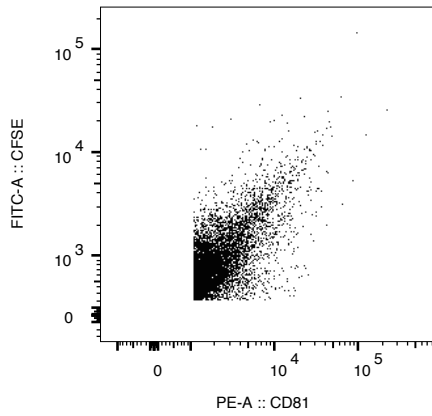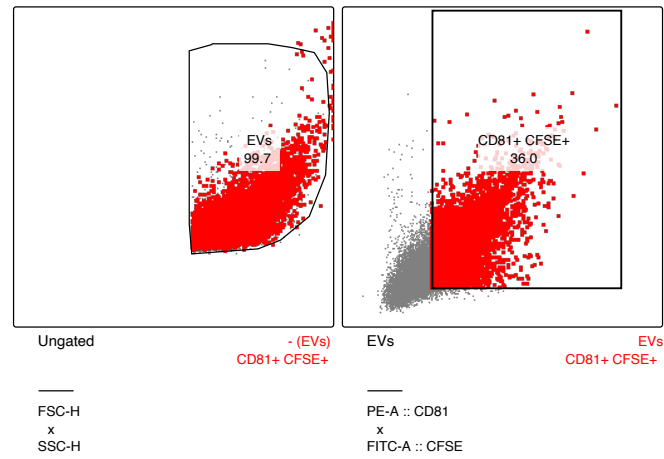

| Sample Name                               | Freq. of EVs |
|-------------------------------------------|--------------|
| Specimen_001_344-2D (EV staining)_013.fcs | 36.0         |

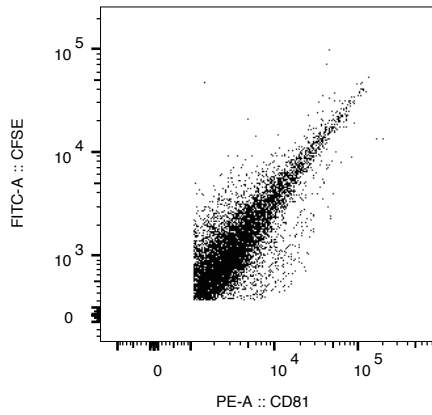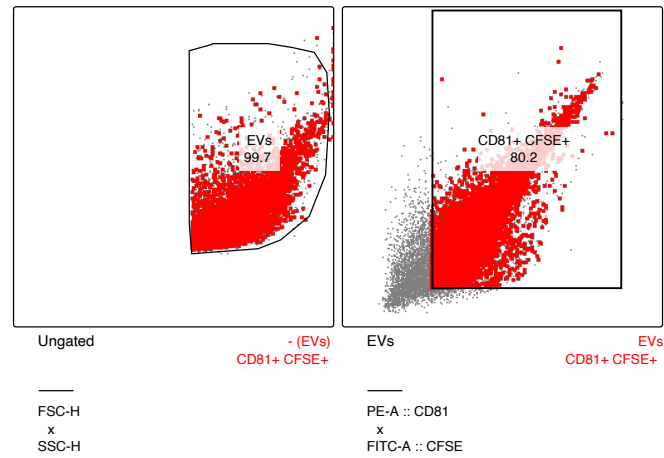

| Sample Name                                | Freq. of EVs |
|--------------------------------------------|--------------|
| Specimen_001_NP25-2D (EV staining)_021.fcs | 80.2         |



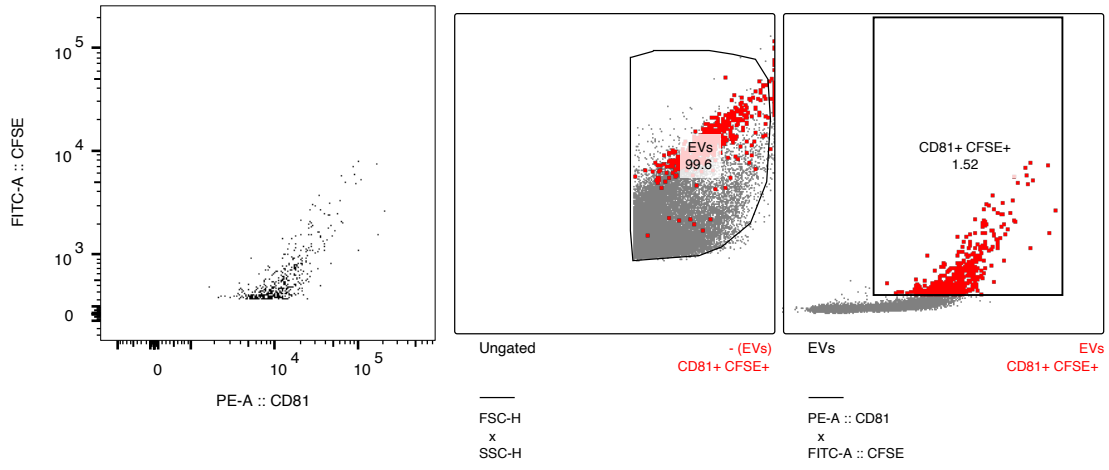

| Sample Name                               | Freq. of EVs |
|-------------------------------------------|--------------|
| Specimen_001_27-2D (IgG staining)_006.fcs | 1.52         |

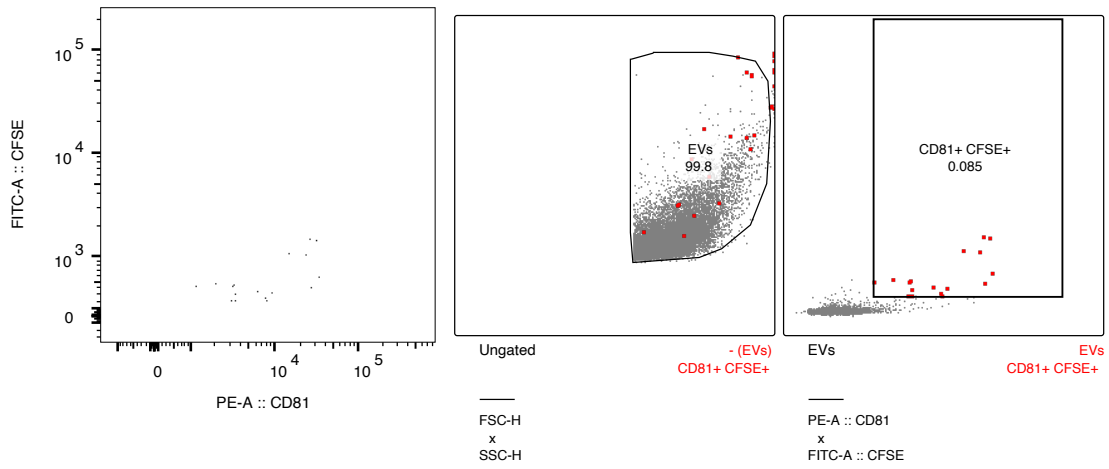

| Sample Name                                | Freq. of EVs |
|--------------------------------------------|--------------|
| Specimen_001_344-2D (IGG staining)_014.fcs | 0.085        |

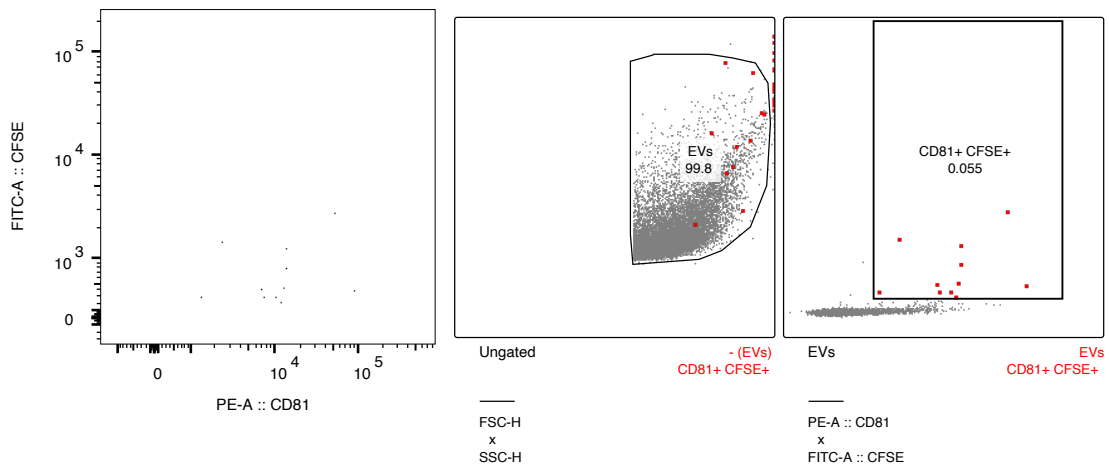

| Sample Name                                 | Freq. of EVs |
|---------------------------------------------|--------------|
| Specimen_001_NP25-2D (IGG staining)_022.fcs | 0.055        |

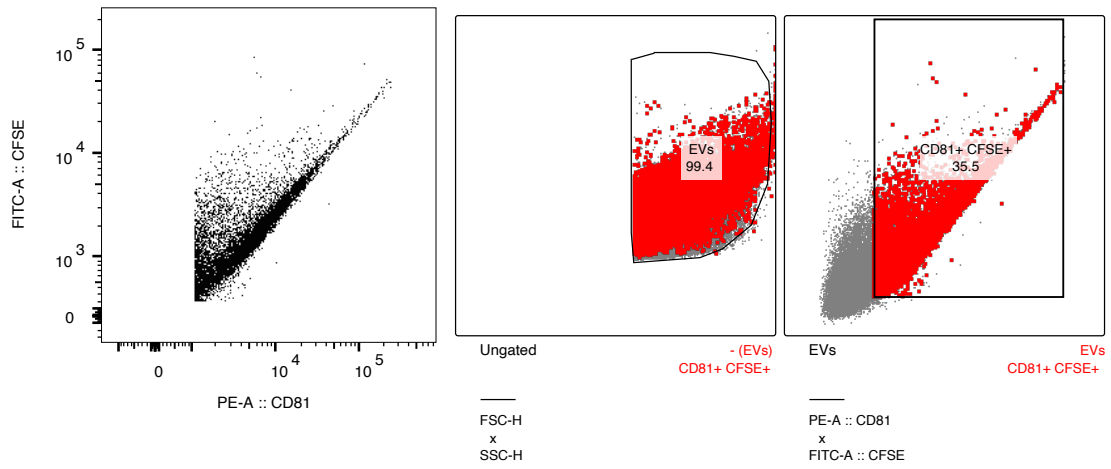

| Sample Name                              | Freq. of EVs |
|------------------------------------------|--------------|
| Specimen_001_27-3D (EV staining)_007.fcs | 35.5         |

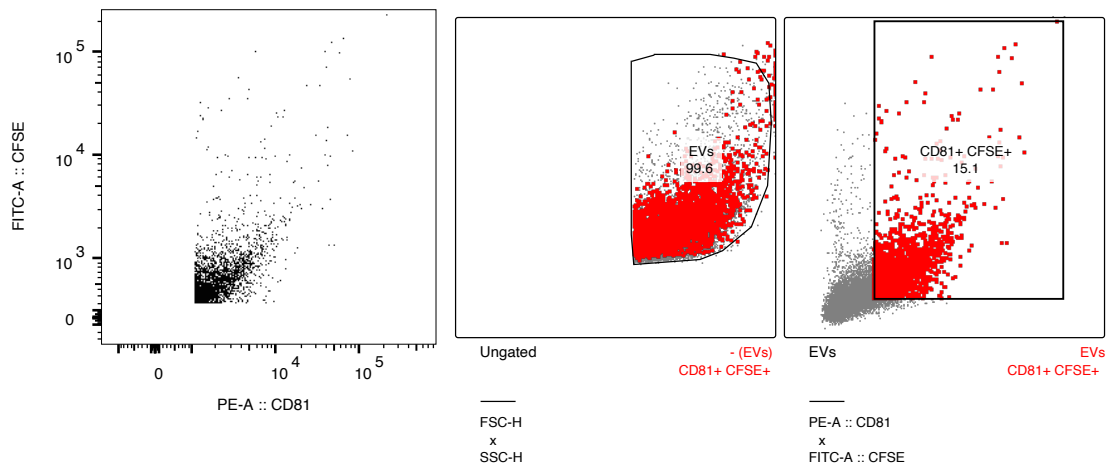

| Sample Name                               | Freq. of EVs |
|-------------------------------------------|--------------|
| Specimen_001_344-3D (EV staining)_015.fcs | 15.1         |

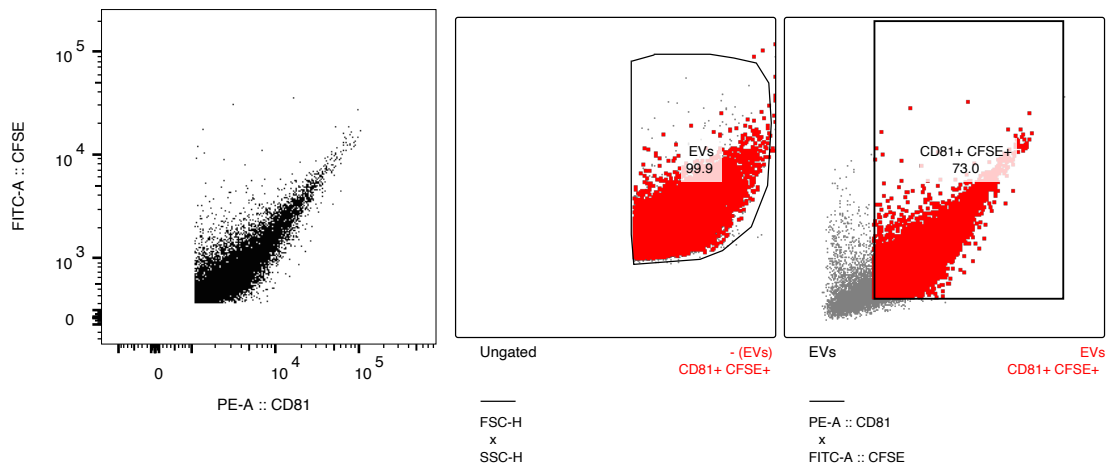

| Sample Name                                | Freq. of EVs |
|--------------------------------------------|--------------|
| Specimen_001_NP25-3D (EV staining)_023.fcs | 73.0         |

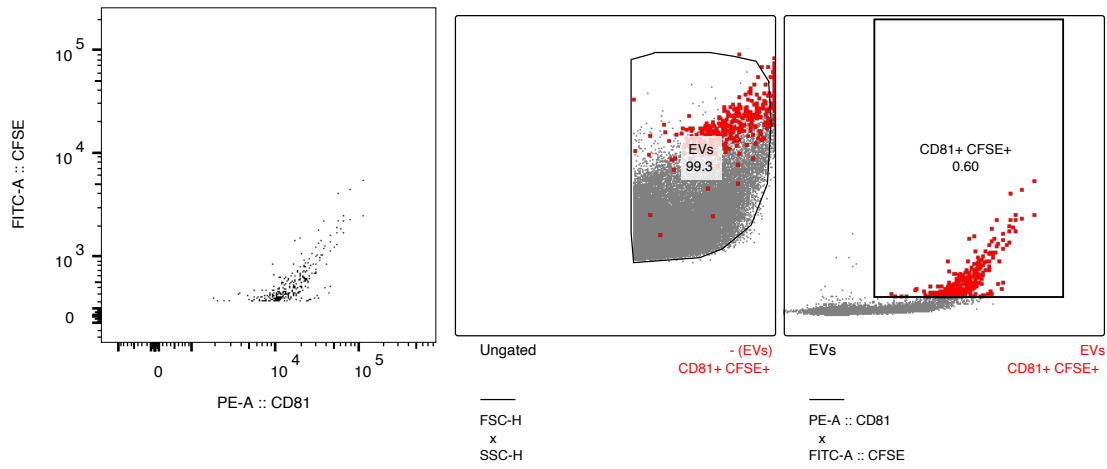

| Sample Name                               | Freq. of EVs |
|-------------------------------------------|--------------|
| Specimen_001_27-3D (IgG staining)_008.fcs | 0.60         |

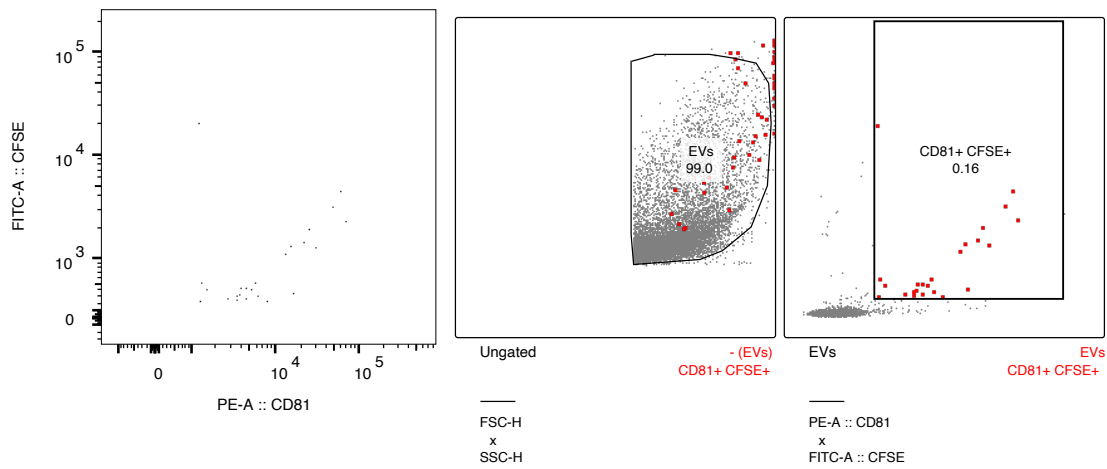

| Sample Name                                | Freq. of EVs |
|--------------------------------------------|--------------|
| Specimen_001_344-3D (IGG staining)_016.fcs | 0.16         |

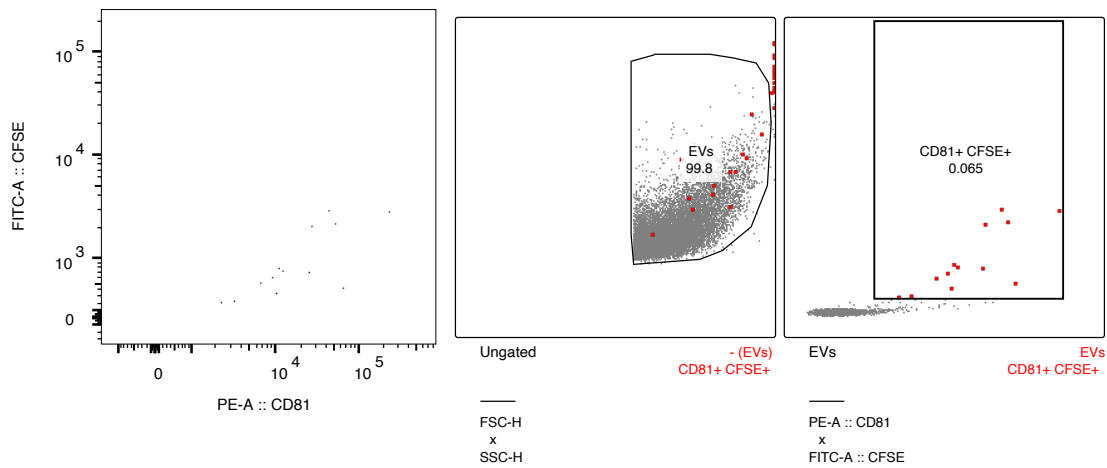

| Sample Name                                 | Freq. of EVs |
|---------------------------------------------|--------------|
| Specimen_001_NP25-3D (IGG staining)_024.fcs | 0.065        |



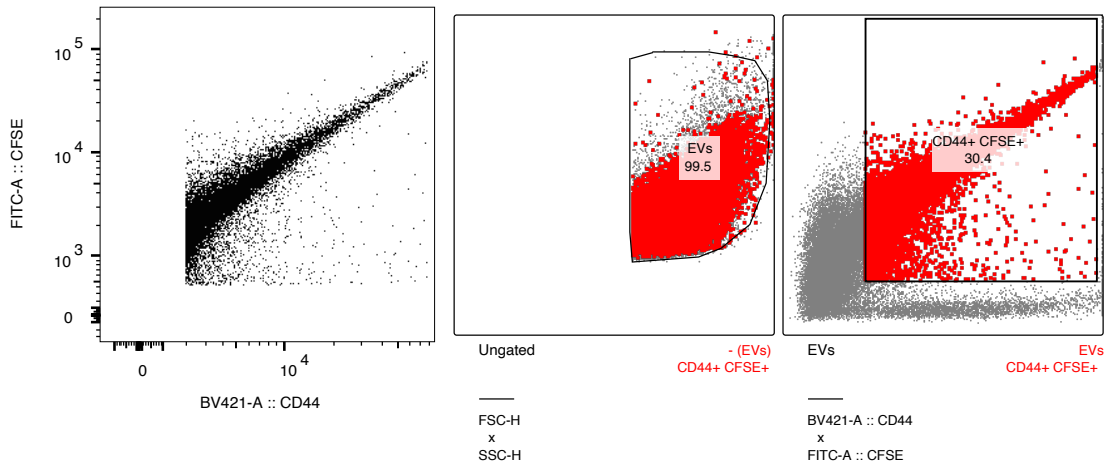

| Sample Name                              | Freq. of EVs |
|------------------------------------------|--------------|
| Specimen_001_21-2D (EV staining)_001.fcs | 30.4         |

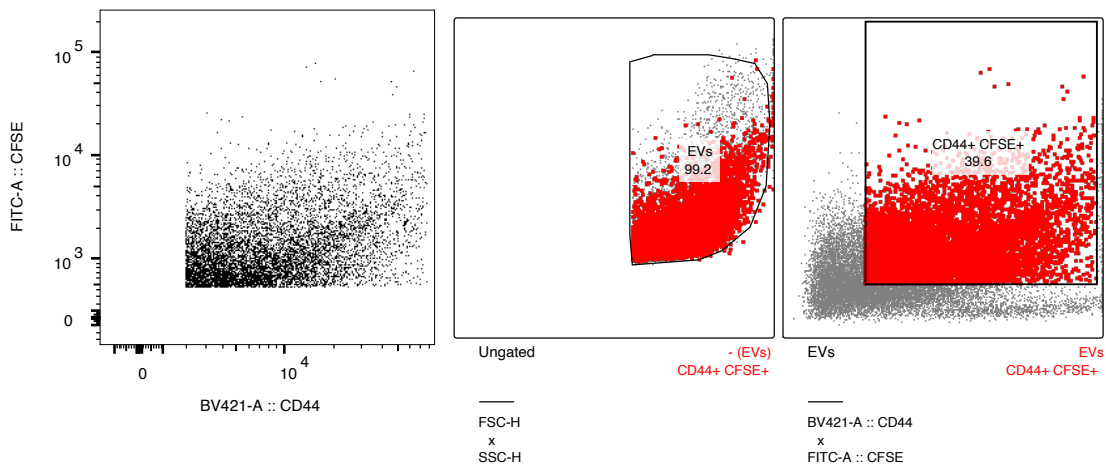

| Sample Name                               | Freq. of EVs |
|-------------------------------------------|--------------|
| Specimen_001_337-2D (EV staining)_009.fcs | 39.6         |

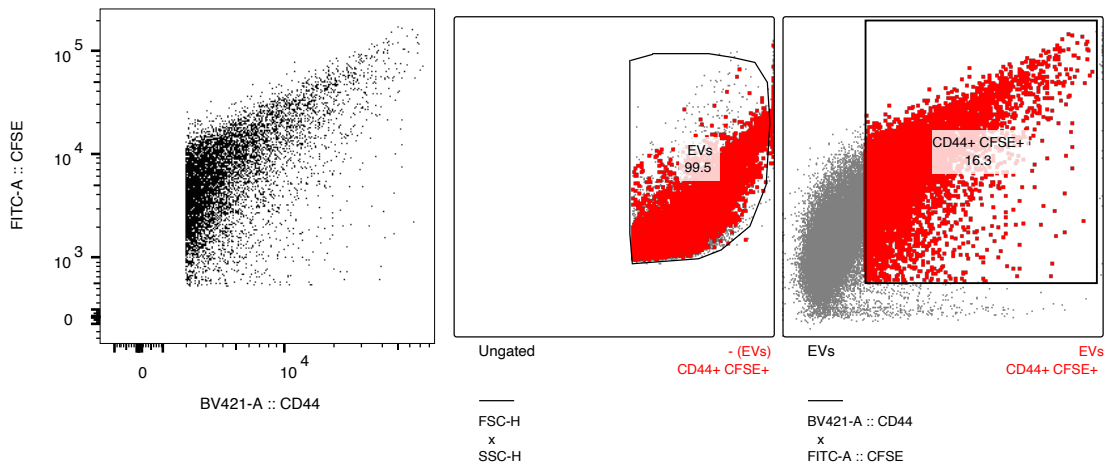

| Sample Name                              | Freq. of EVs |
|------------------------------------------|--------------|
| Specimen_001_57-2D (EV staining)_017.fcs | 16.3         |

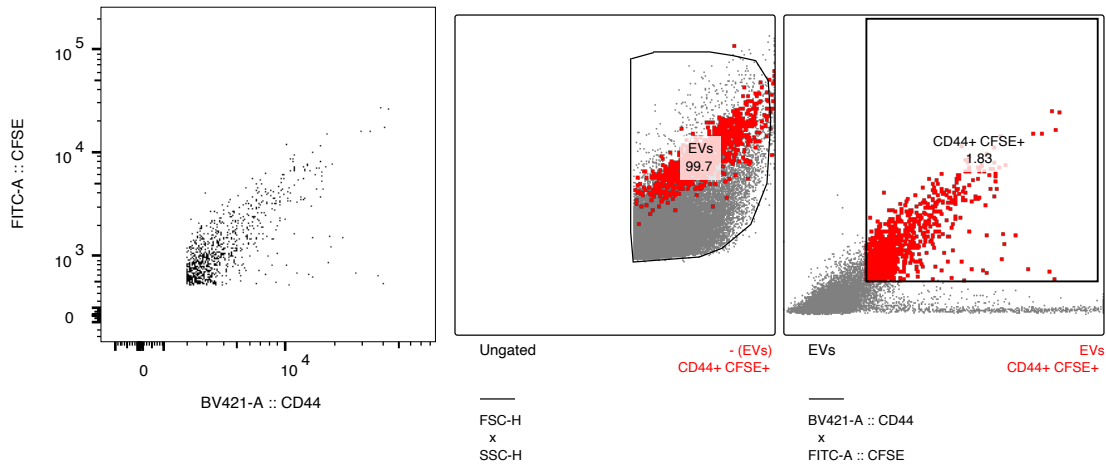

| Sample Name                               | Freq. of EVs |
|-------------------------------------------|--------------|
| Specimen_001_21-2D (IgG staining)_002.fcs | 1.83         |

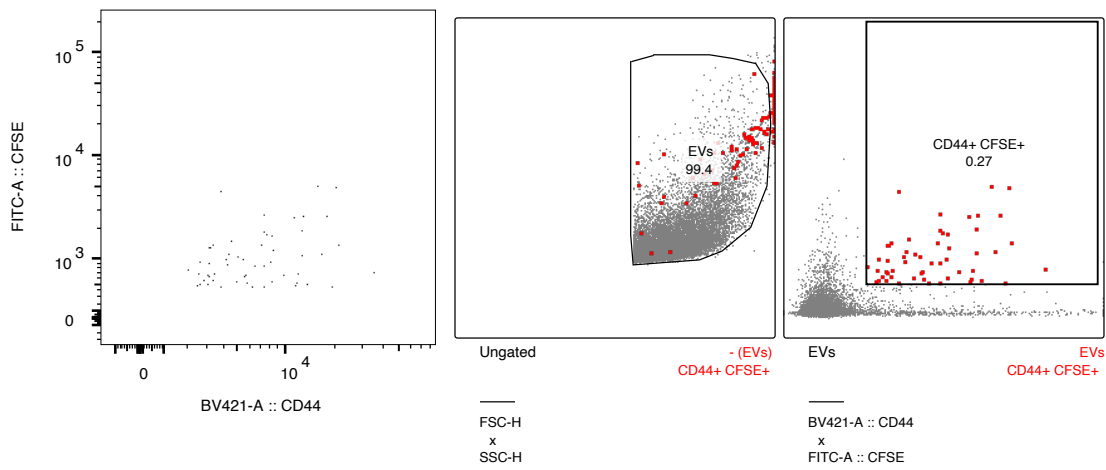

| Sample Name                                | Freq. of EVs |
|--------------------------------------------|--------------|
| Specimen_001_337-2D (IGG staining)_010.fcs | 0.27         |

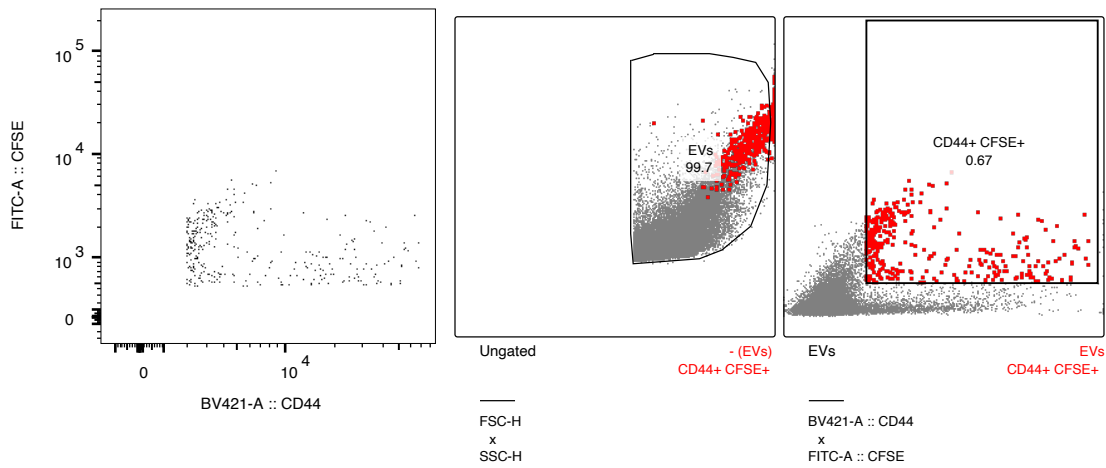

| Sample Name                               | Freq. of EVs |
|-------------------------------------------|--------------|
| Specimen_001_57-2D (IGG staining)_018.fcs | 0.67         |

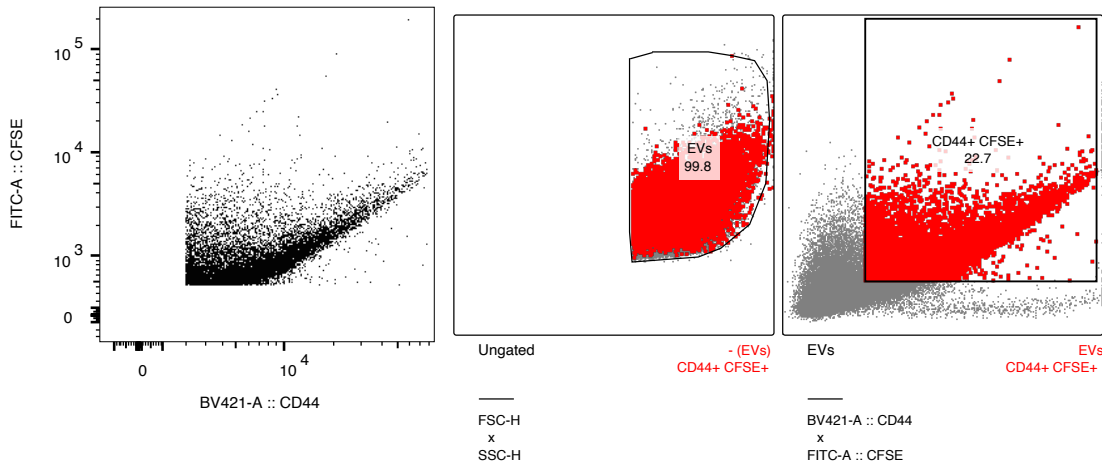

| Sample Name                              | Freq. of EVs |
|------------------------------------------|--------------|
| Specimen_001_21-3D (EV staining)_003.fcs | 22.7         |

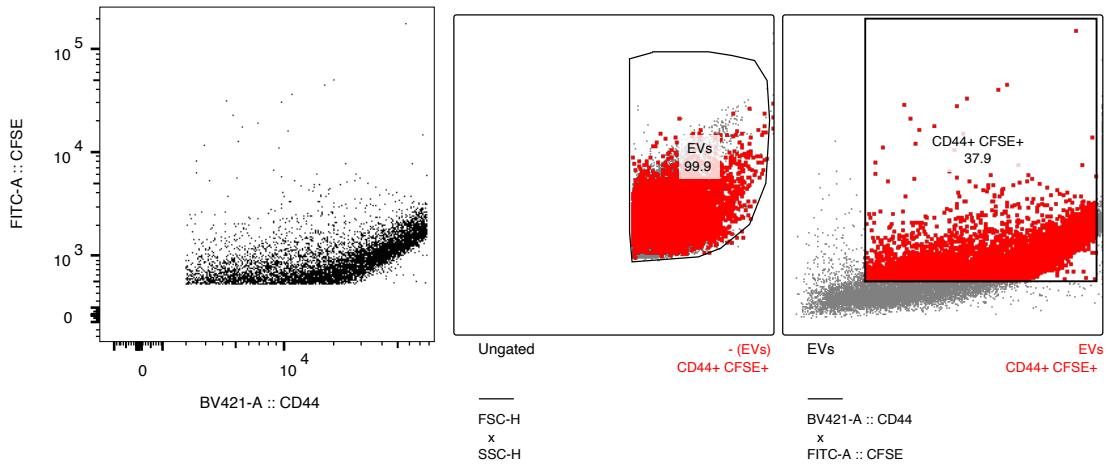

| Sample Name                               | Freq. of EVs |
|-------------------------------------------|--------------|
| Specimen_001_337-3D (EV staining)_011.fcs | 37.9         |

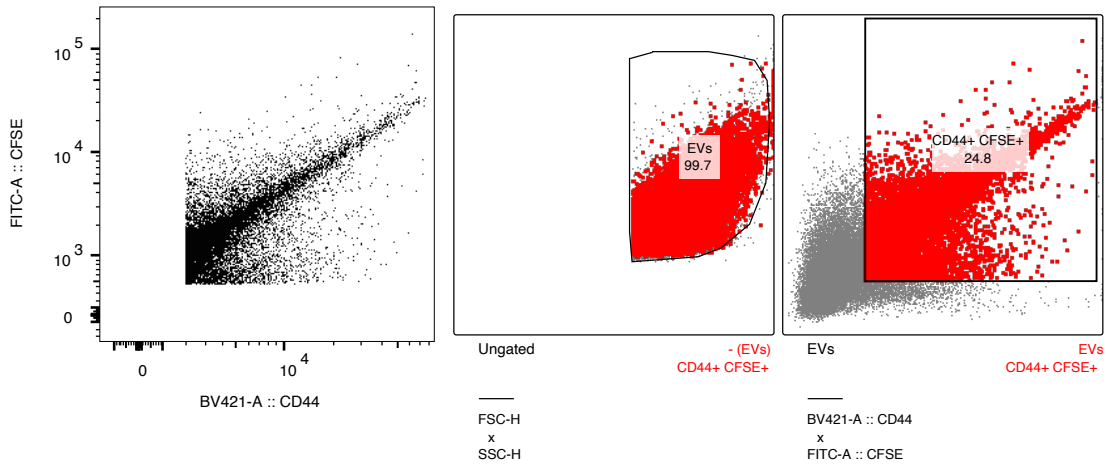

| Sample Name                              | Freq. of EVs |
|------------------------------------------|--------------|
| Specimen_001_57-3D (EV staining)_019.fcs | 24.8         |

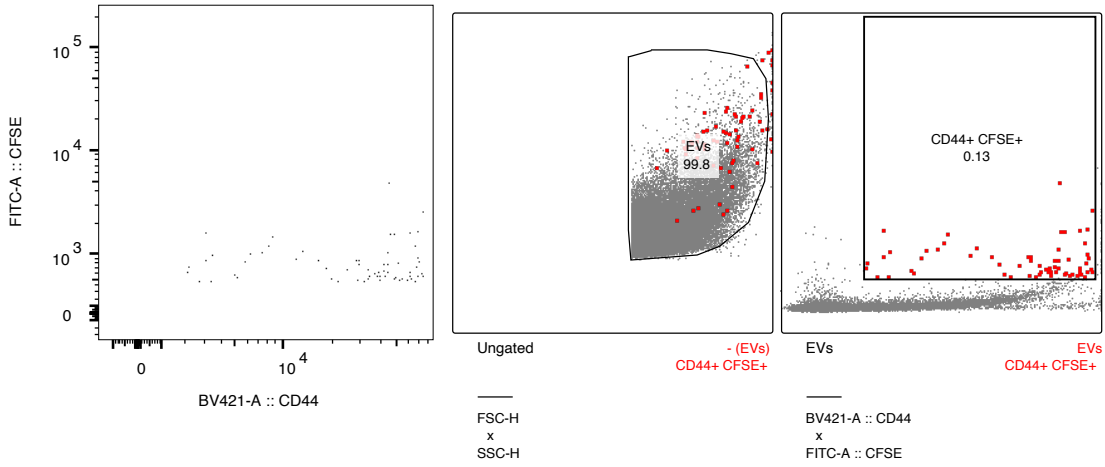

| Sample Name                               | Freq. of EVs |
|-------------------------------------------|--------------|
| Specimen_001_21-3D (IgG staining)_004.fcs | 0.13         |

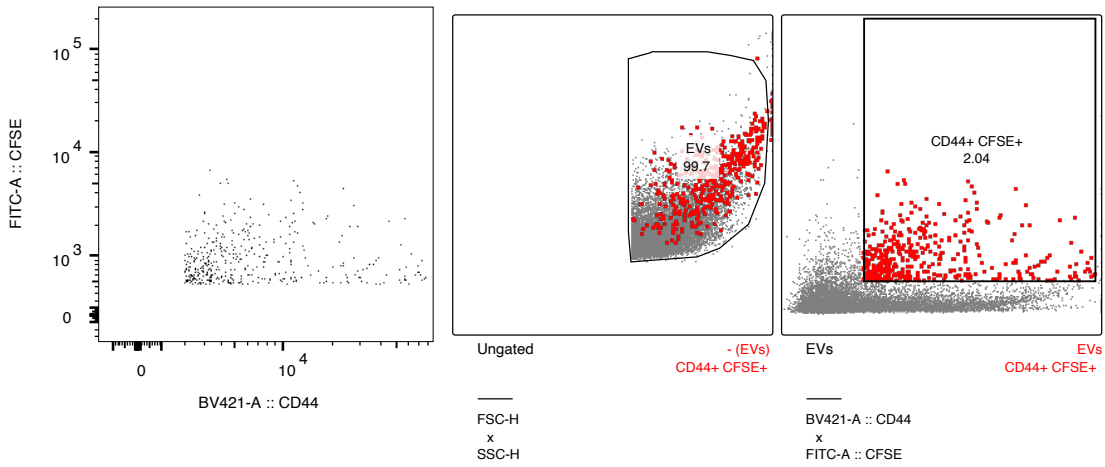

| Sample Name                                | Freq. of EVs |
|--------------------------------------------|--------------|
| Specimen_001_337-3D (IGG staining)_012.fcs | 2.04         |

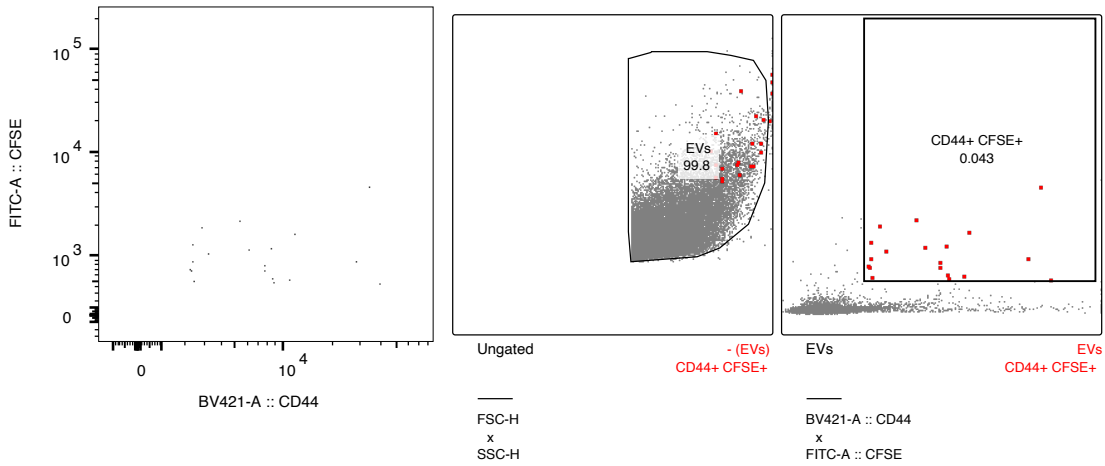

| Sample Name                               | Freq. of EVs |
|-------------------------------------------|--------------|
| Specimen_001_57-3D (IGG staining)_020.fcs | 0.043        |



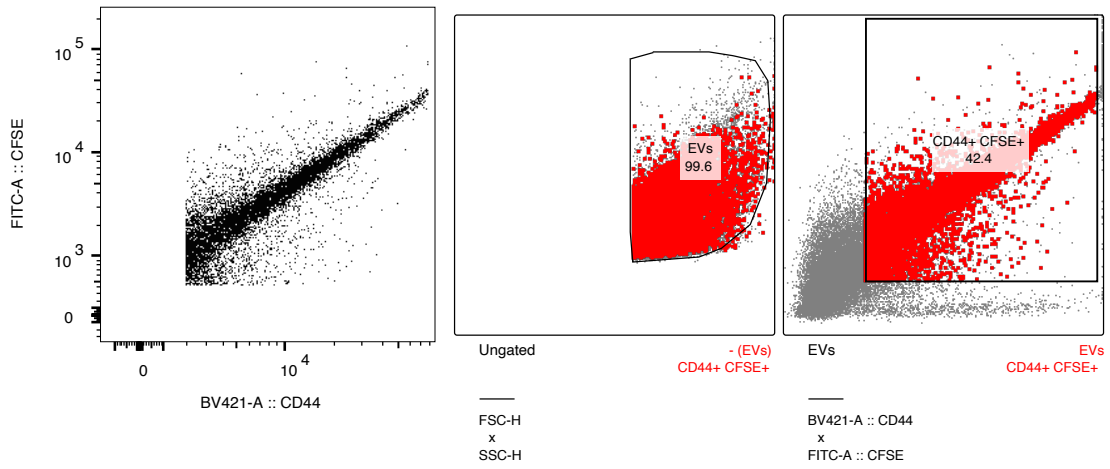

| Sample Name                              | Freq. of EVs |
|------------------------------------------|--------------|
| Specimen_001_27-2D (EV staining)_005.fcs | 42.4         |

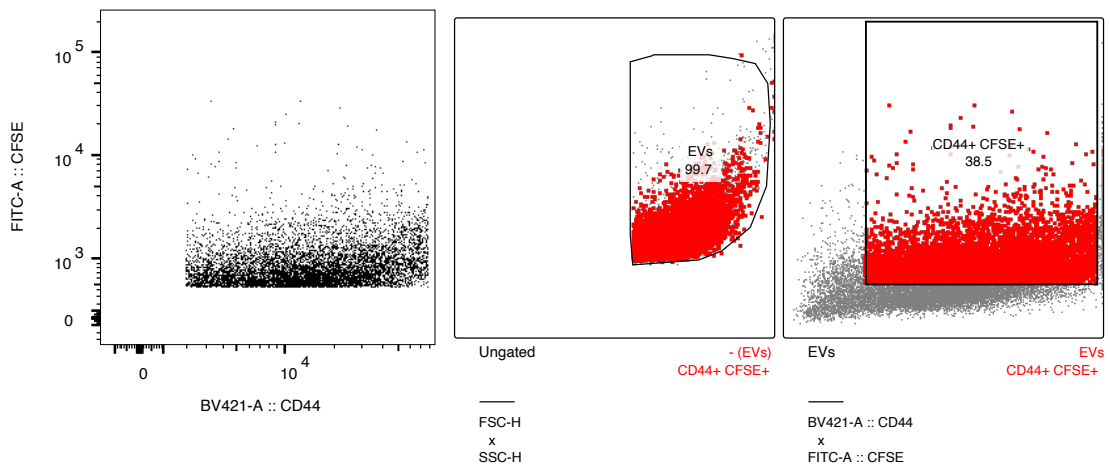

| Sample Name                               | Freq. of EVs |
|-------------------------------------------|--------------|
| Specimen_001_344-2D (EV staining)_013.fcs | 38.5         |

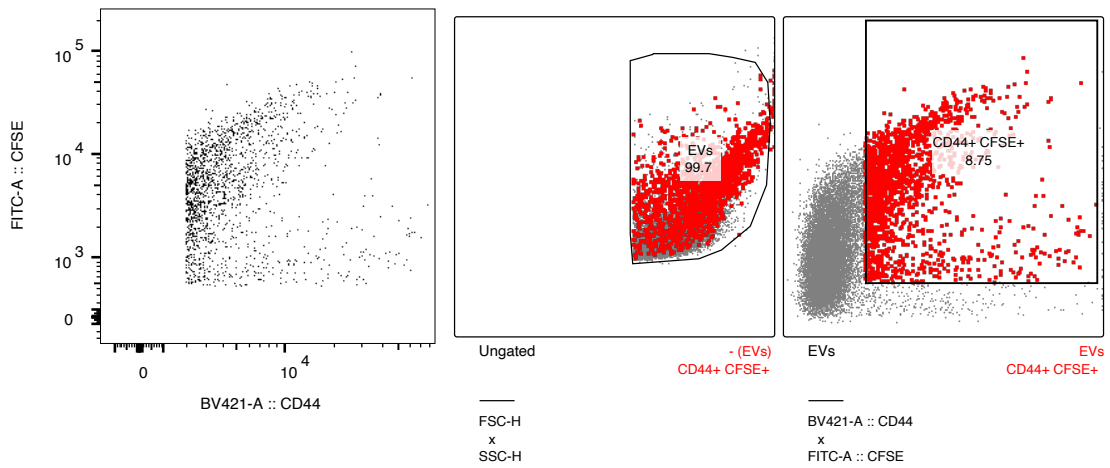

| Sample Name                                | Freq. of EVs |
|--------------------------------------------|--------------|
| Specimen_001_NP25-2D (EV staining)_021.fcs | 8.75         |

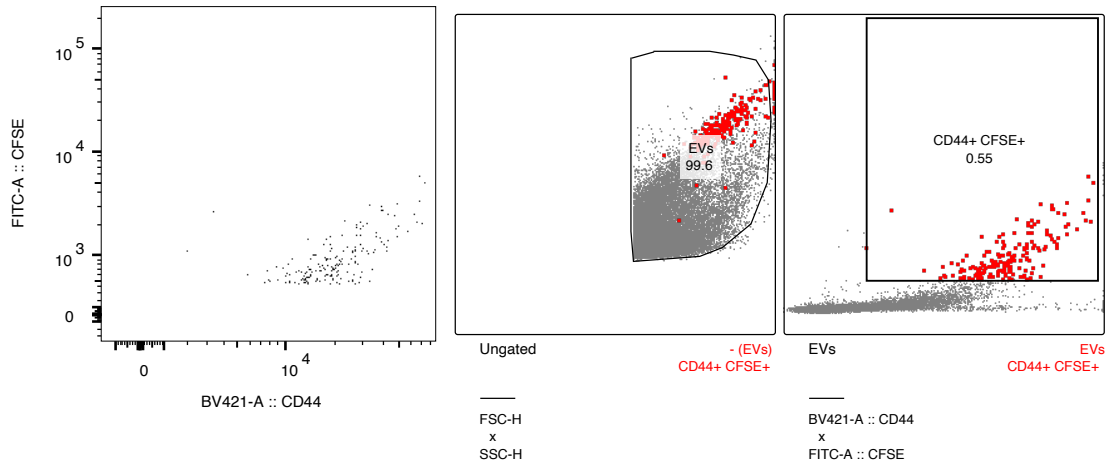

| Sample Name                               | Freq. of EVs |
|-------------------------------------------|--------------|
| Specimen_001_27-2D (IgG staining)_006.fcs | 0.55         |

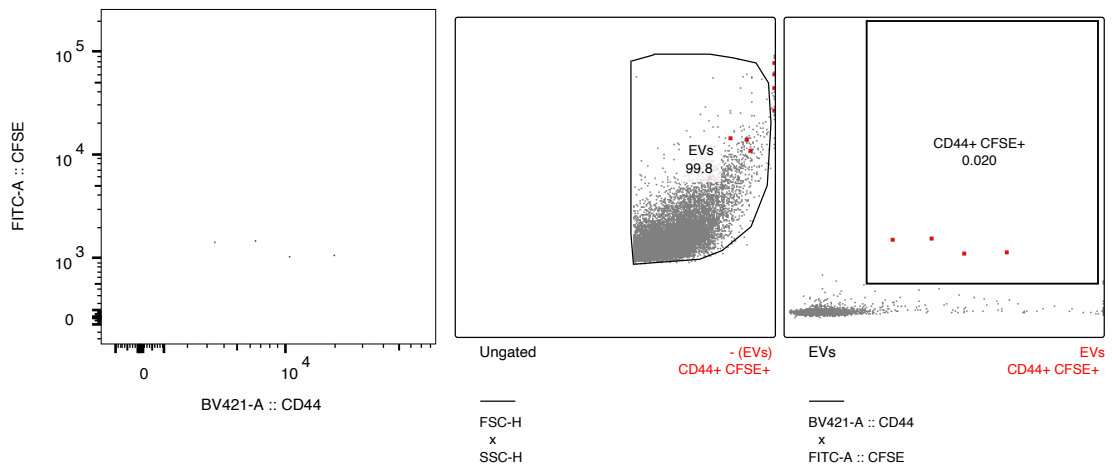

| Sample Name                                | Freq. of EVs |
|--------------------------------------------|--------------|
| Specimen_001_344-2D (IGG staining)_014.fcs | 0.020        |

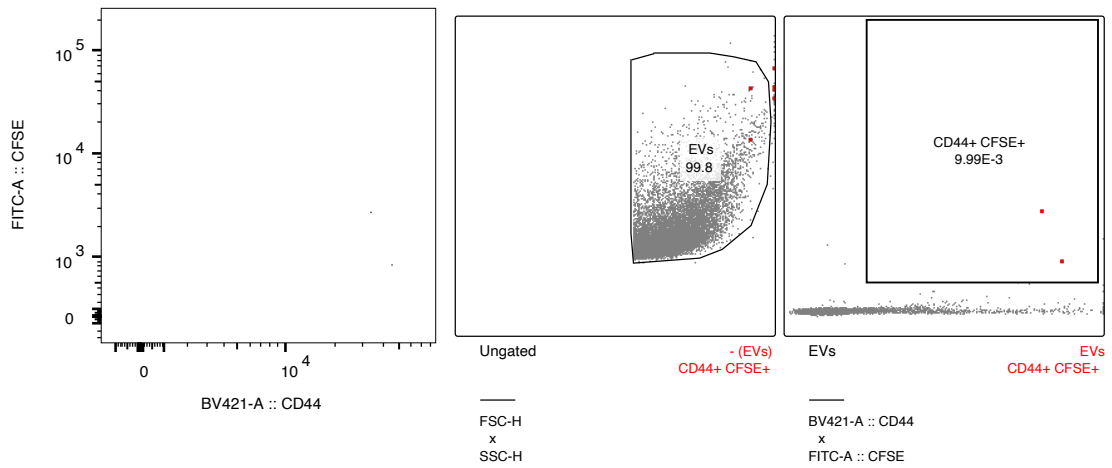

| Sample Name                                 | Freq. of EVs |
|---------------------------------------------|--------------|
| Specimen_001_NP25-2D (IGG staining)_022.fcs | 9.99E-3      |

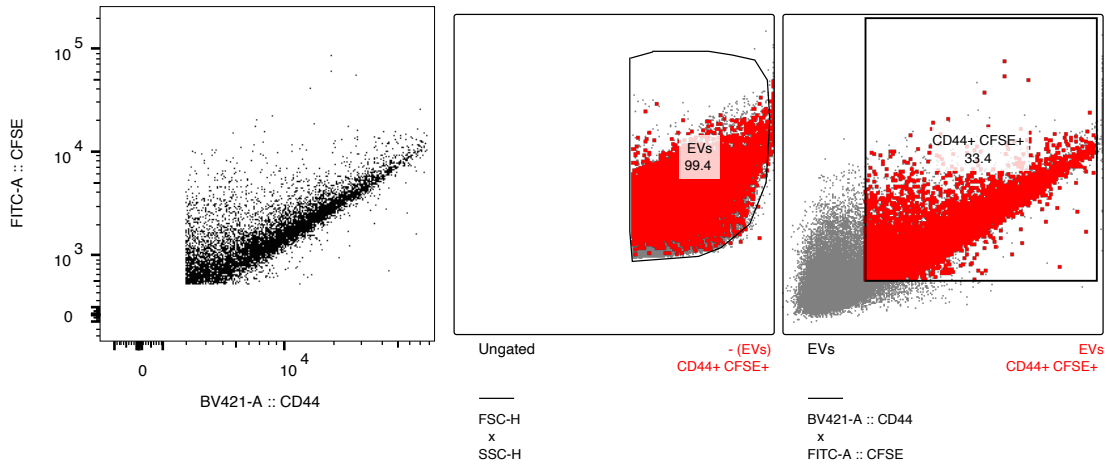

| Sample Name                              | Freq. of EVs |
|------------------------------------------|--------------|
| Specimen_001_27-3D (EV staining)_007.fcs | 33.4         |

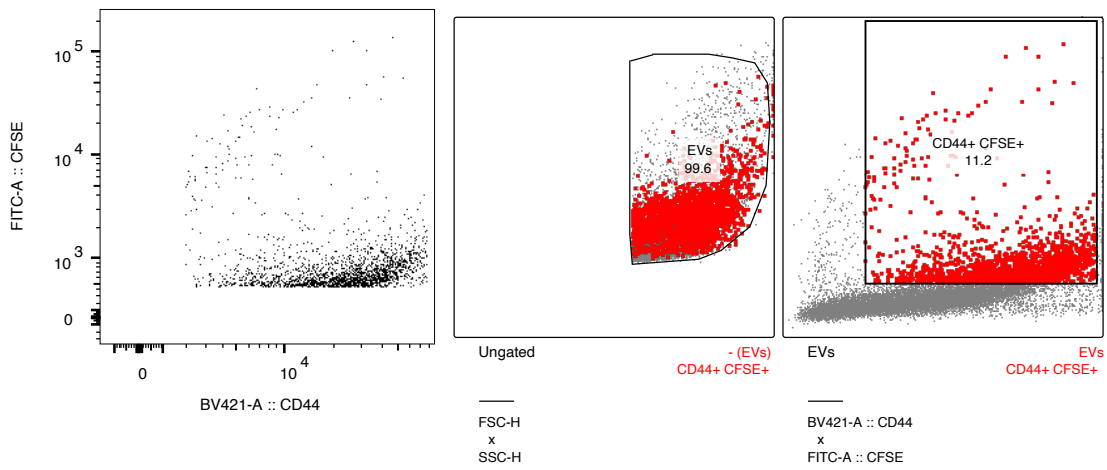

| Sample Name                               | Freq. of EVs |
|-------------------------------------------|--------------|
| Specimen_001_344-3D (EV staining)_015.fcs | 11.2         |

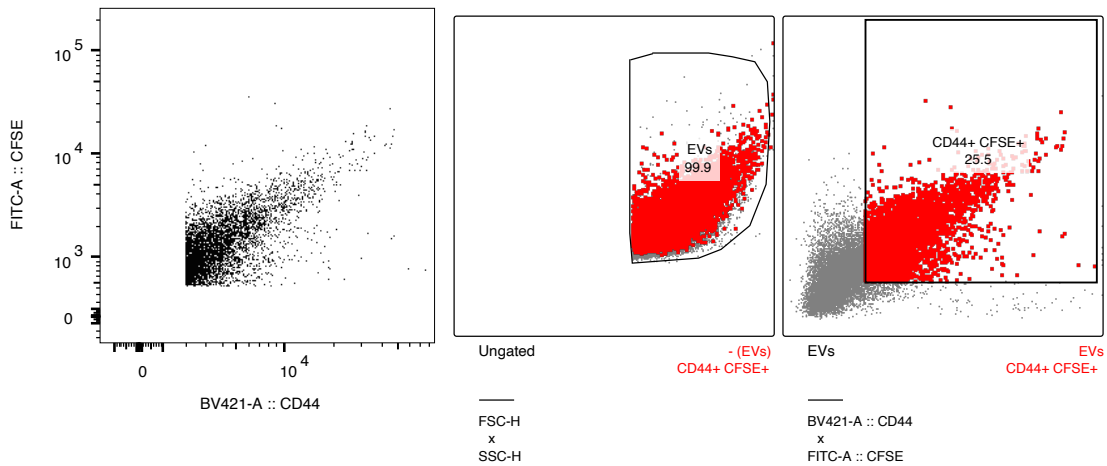

| Sample Name                                | Freq. of EVs |
|--------------------------------------------|--------------|
| Specimen_001_NP25-3D (EV staining)_023.fcs | 25.5         |

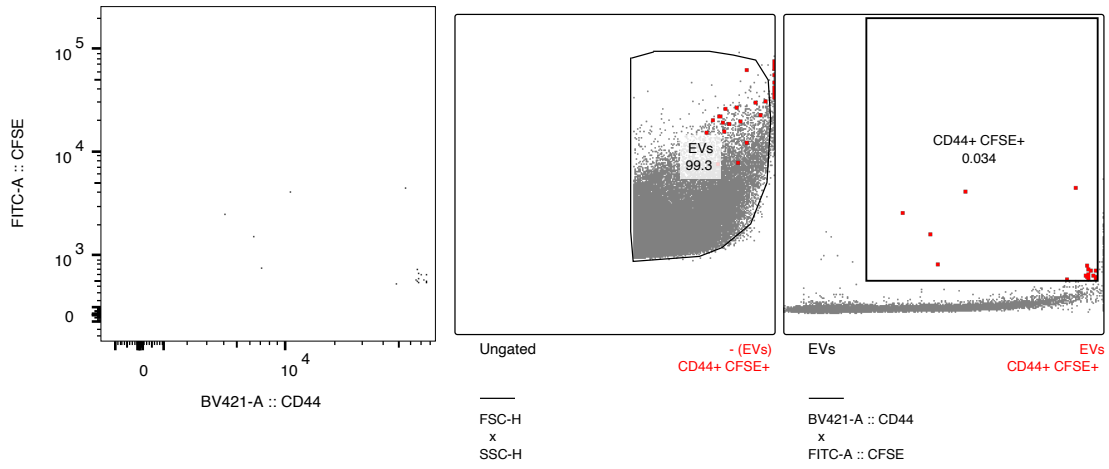

| Sample Name                               | Freq. of EVs |
|-------------------------------------------|--------------|
| Specimen_001_27-3D (IgG staining)_008.fcs | 0.034        |

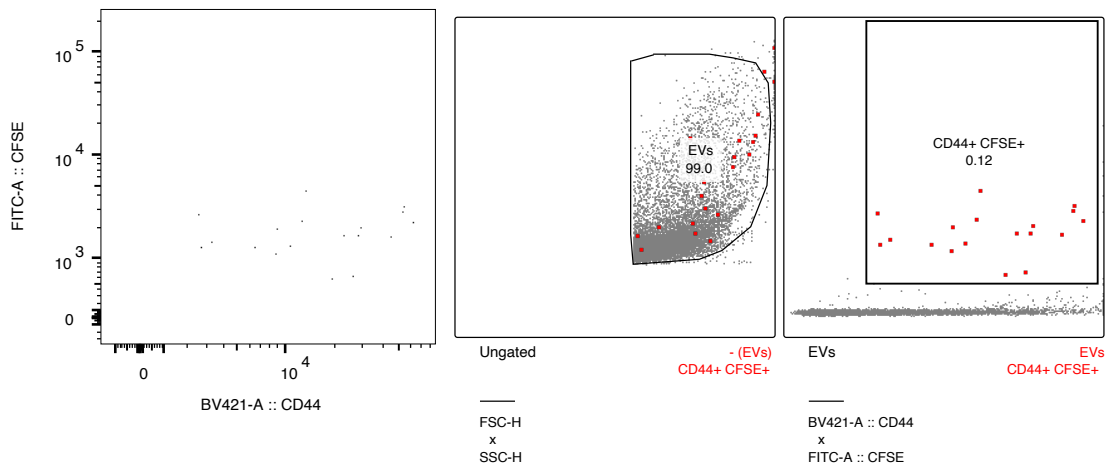

| Sample Name                                | Freq. of EVs |
|--------------------------------------------|--------------|
| Specimen_001_344-3D (IGG staining)_016.fcs | 0.12         |

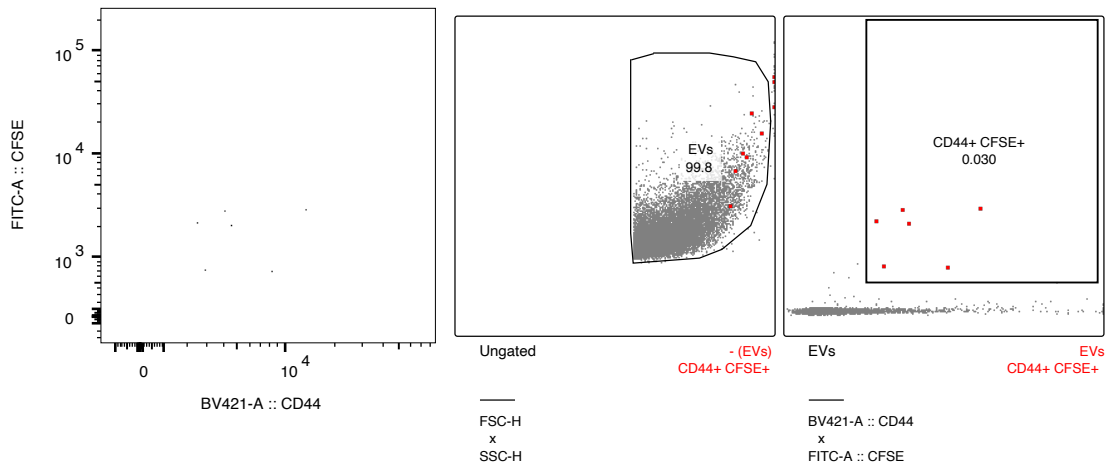

| Sample Name                                 | Freq. of EVs |
|---------------------------------------------|--------------|
| Specimen_001_NP25-3D (IGG staining)_024.fcs | 0.030        |

# IA EV surface marker staining

| Cell line name in the manuscript | Cell line name in the gating dot plot |
|----------------------------------|---------------------------------------|
| BTIC10                           | 21                                    |
| BTIC13                           | 27                                    |
| BTIC131                          | 344                                   |
| BTIC18                           | 57                                    |
| BTIC129                          | 337                                   |
| BTIC155                          | NP25                                  |

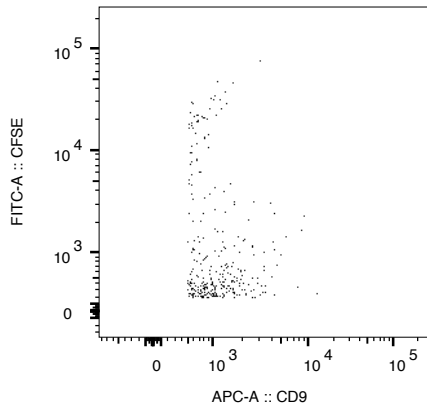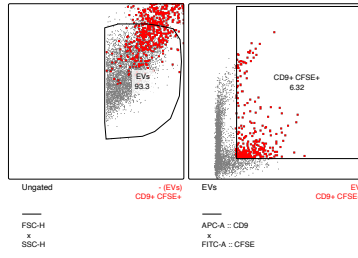

| Sample Name                              | Freq. of EVs |
|------------------------------------------|--------------|
| Specimen_001_21-2D (EV staining)_001.fcs | 6.32         |

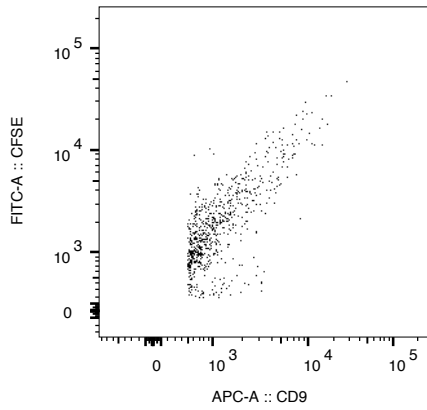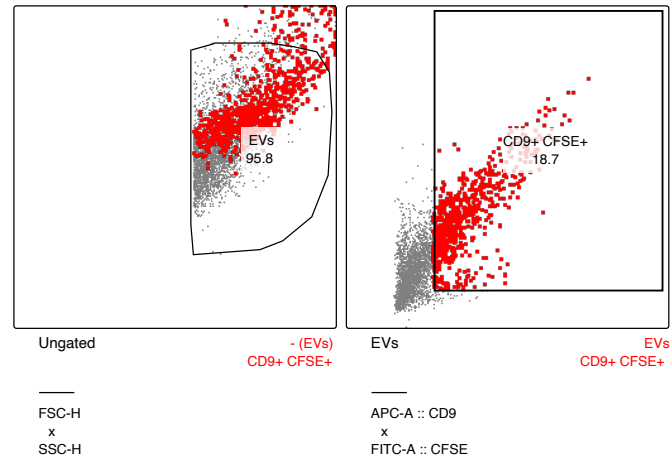

| Sample Name                               | Freq. of EVs |
|-------------------------------------------|--------------|
| Specimen_001_337-2D (EV staining)_009.fcs | 18.7         |

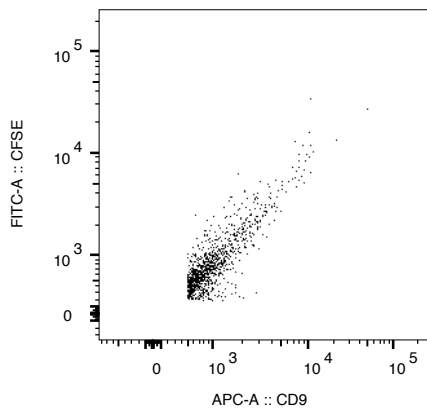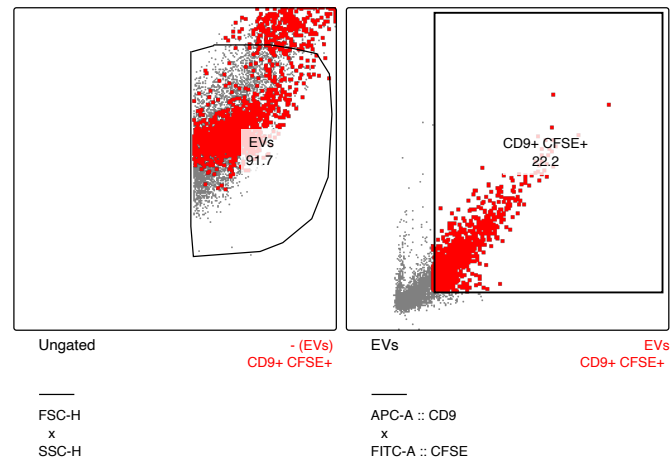

| Sample Name                              | Freq. of EVs |
|------------------------------------------|--------------|
| Specimen_001_57-2D (EV staining)_017.fcs | 22.2         |

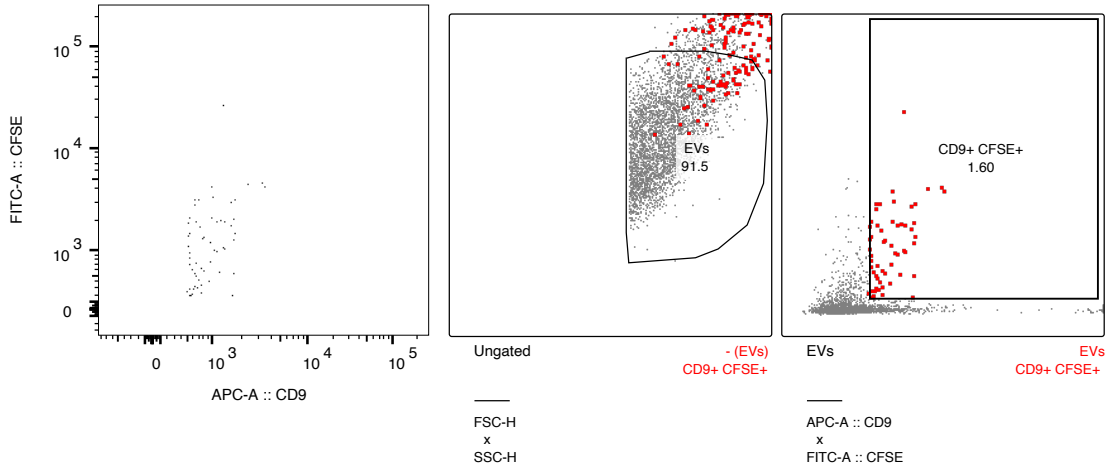

| Sample Name                               | Freq. of EVs |
|-------------------------------------------|--------------|
| Specimen_001_21-2D (IgG staining)_002.fcs | 1.60         |

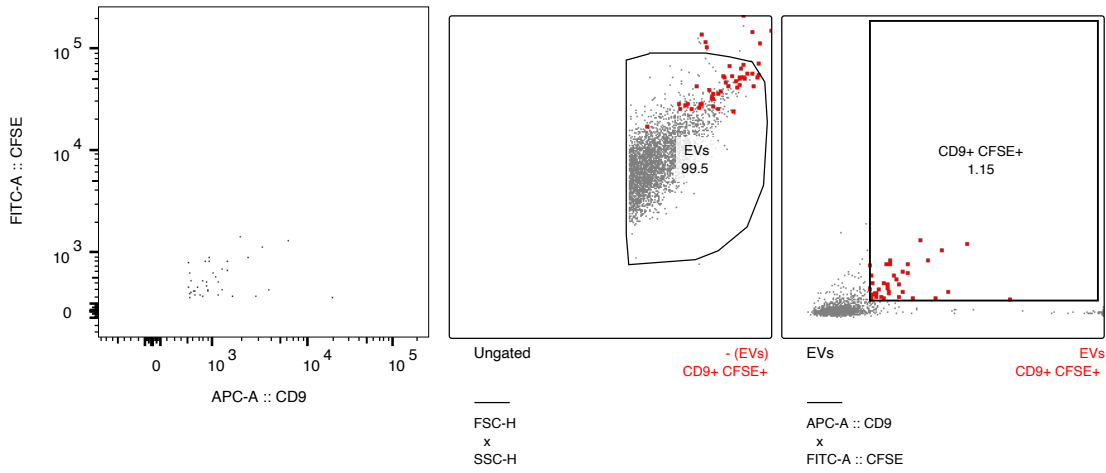

| Sample Name                                | Freq. of EVs |
|--------------------------------------------|--------------|
| Specimen_001_337-2D (IGG staining)_010.fcs | 1.15         |

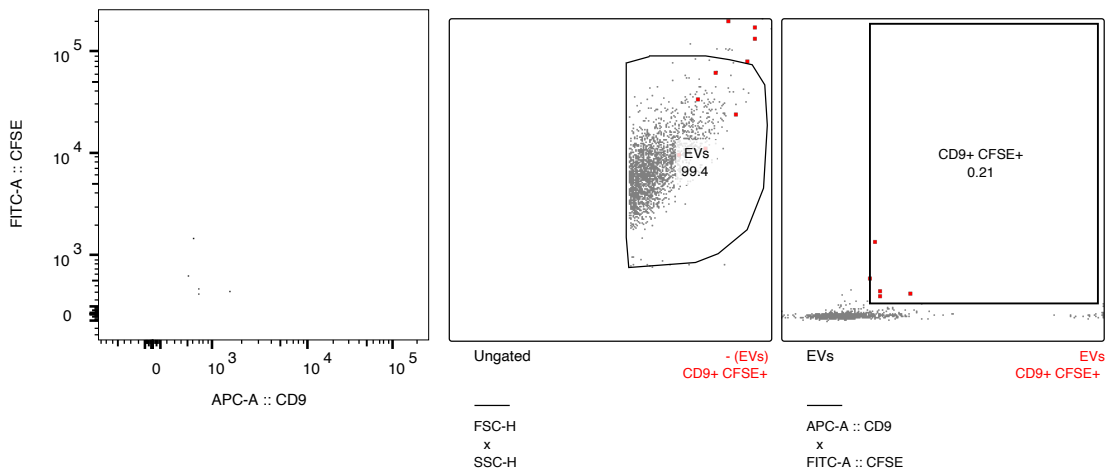

| Sample Name                               | Freq. of EVs |
|-------------------------------------------|--------------|
| Specimen_001_57-2D (IGG staining)_018.fcs | 0.21         |

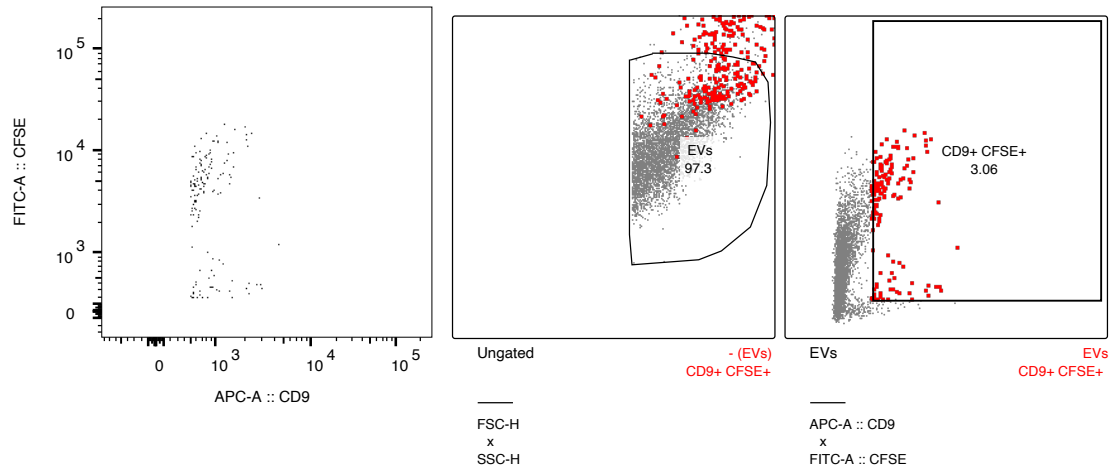

| Sample Name                              | Freq. of EVs |
|------------------------------------------|--------------|
| Specimen_001_21-3D (EV staining)_003.fcs | 3.06         |

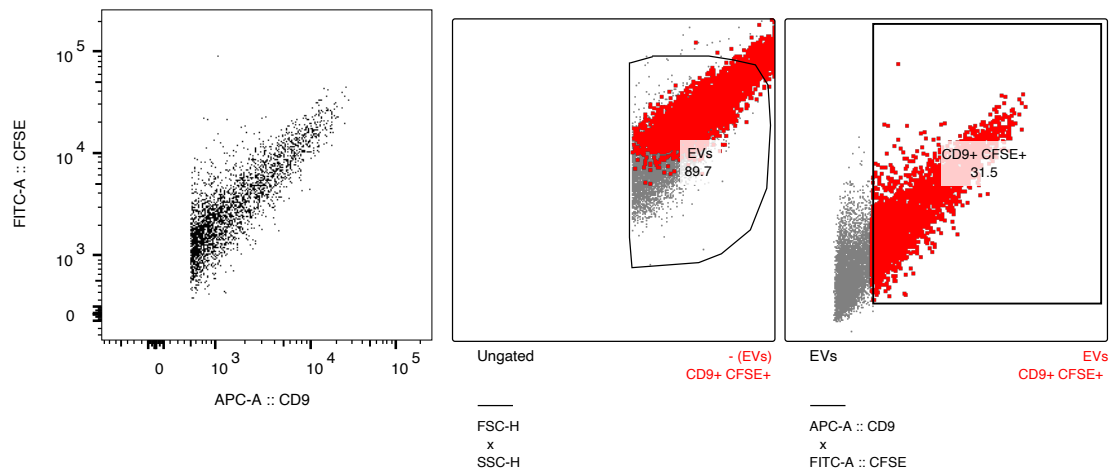

| Sample Name                               | Freq. of EVs |
|-------------------------------------------|--------------|
| Specimen_001_337-3D (EV staining)_011.fcs | 31.5         |

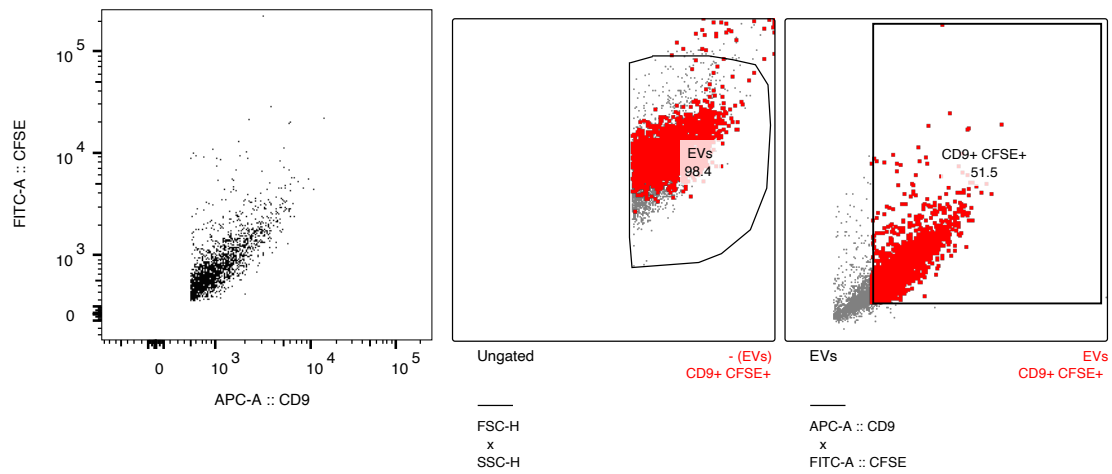

| Sample Name                              | Freq. of EVs |
|------------------------------------------|--------------|
| Specimen_001_57-3D (EV staining)_019.fcs | 51.5         |



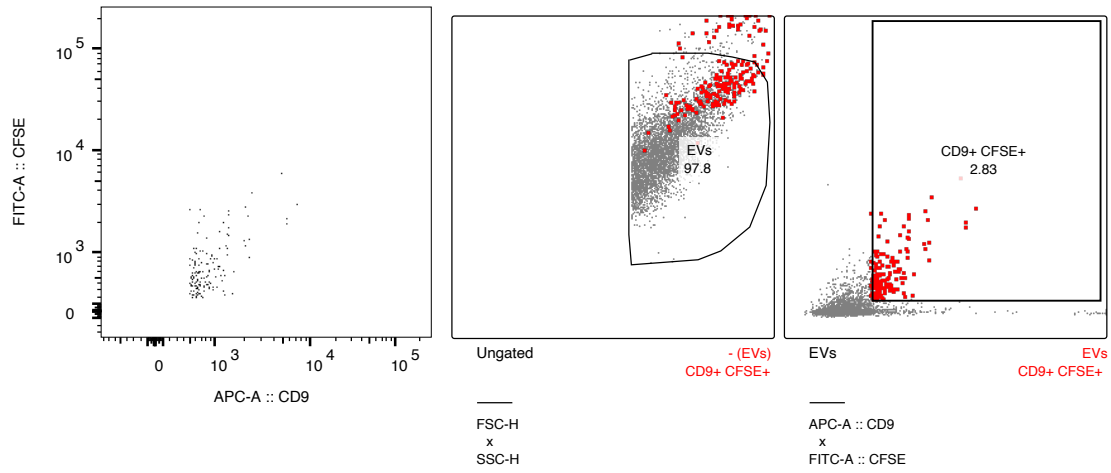

| Sample Name                               | Freq. of EVs |
|-------------------------------------------|--------------|
| Specimen_001_21-3D (IgG staining)_004.fcs | 2.83         |

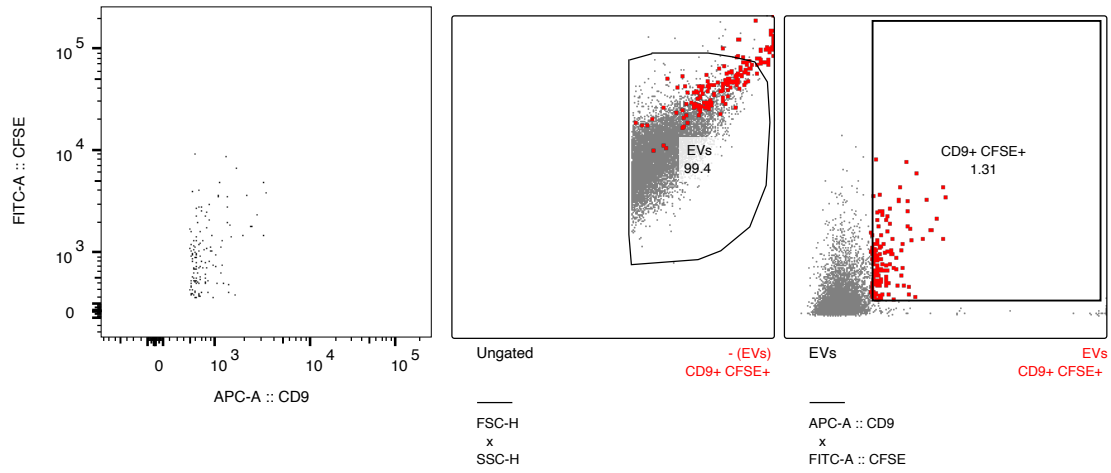

| Sample Name                                | Freq. of EVs |
|--------------------------------------------|--------------|
| Specimen_001_337-3D (IGG staining)_012.fcs | 1.31         |

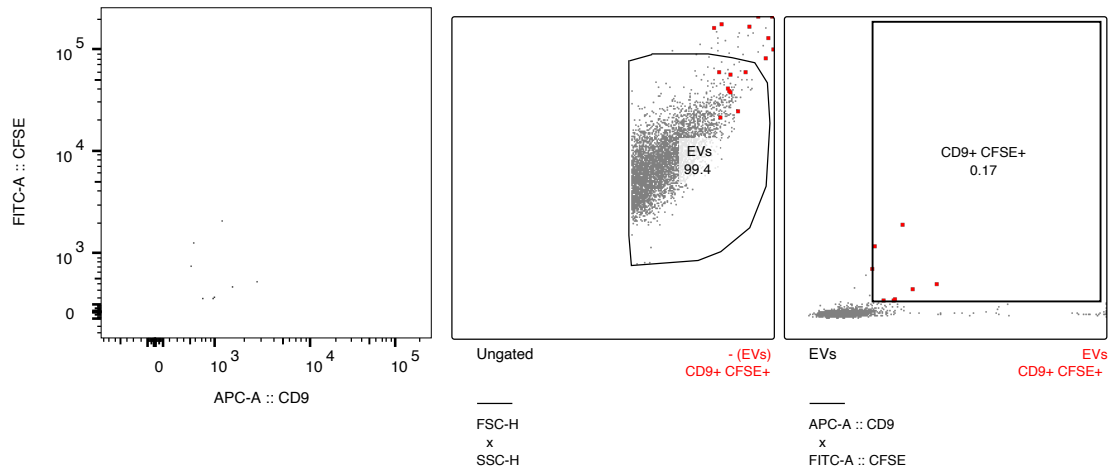

| Sample Name                               | Freq. of EVs |
|-------------------------------------------|--------------|
| Specimen_001_57-3D (IGG staining)_020.fcs | 0.17         |

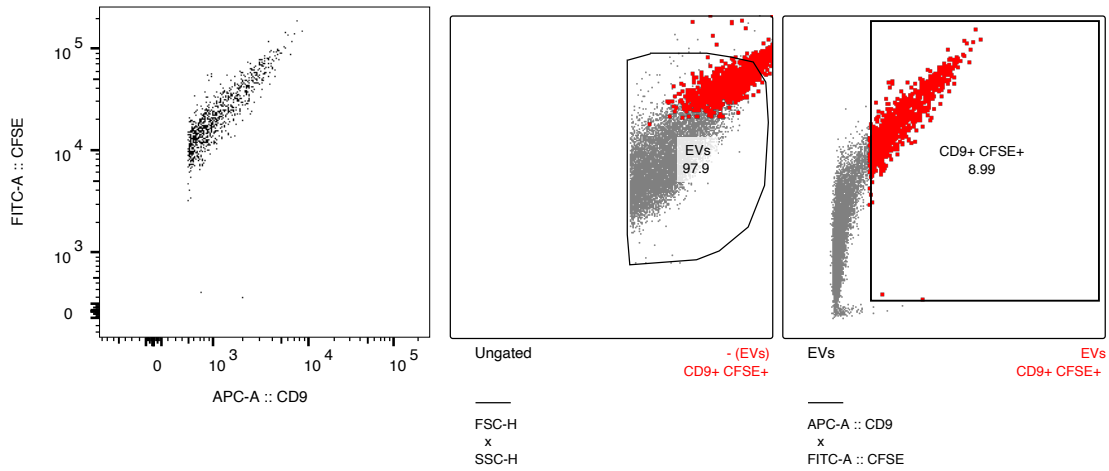

| Sample Name                              | Freq. of EVs |
|------------------------------------------|--------------|
| Specimen_001_27-2D (EV staining)_005.fcs | 8.99         |

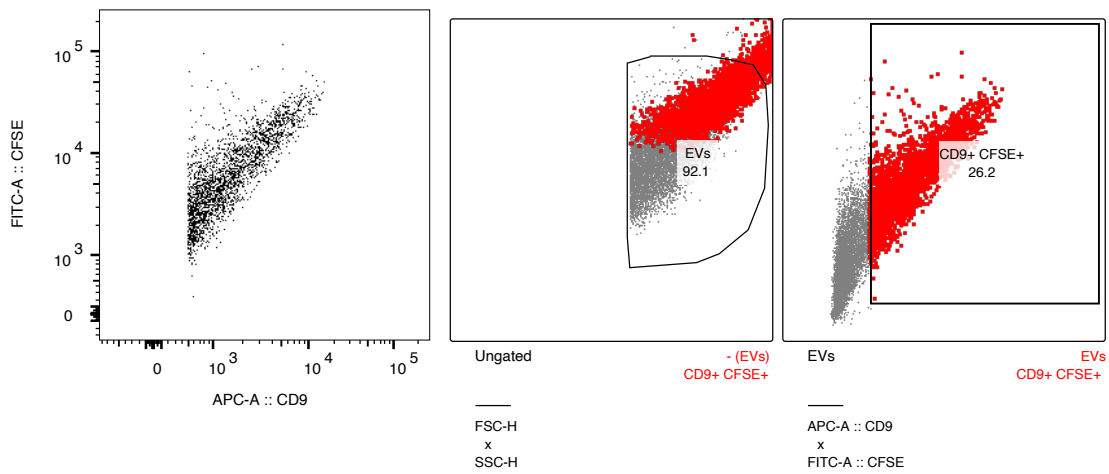

| Sample Name                               | Freq. of EVs |
|-------------------------------------------|--------------|
| Specimen_001_344-2D (EV staining)_013.fcs | 26.2         |

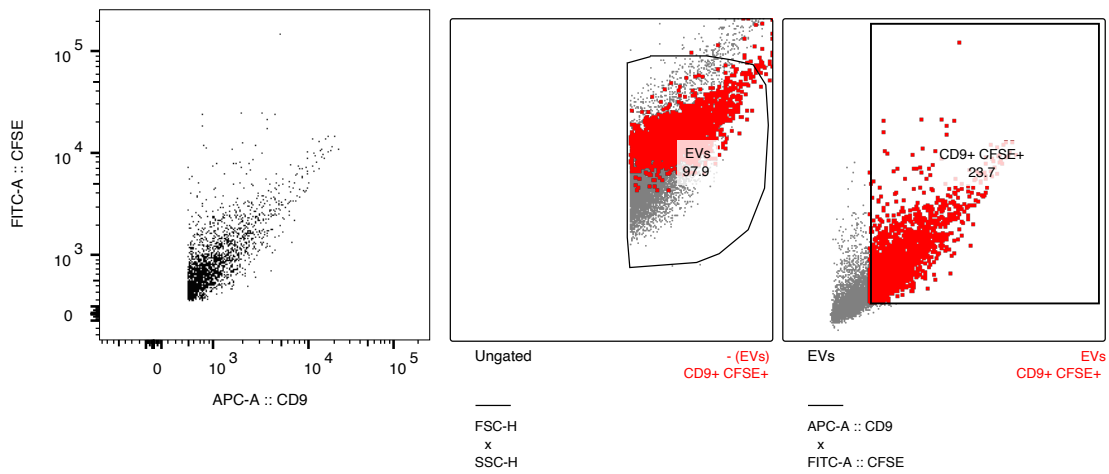

| Sample Name                                | Freq. of EVs |
|--------------------------------------------|--------------|
| Specimen_001_NP25-2D (EV staining)_021.fcs | 23.7         |

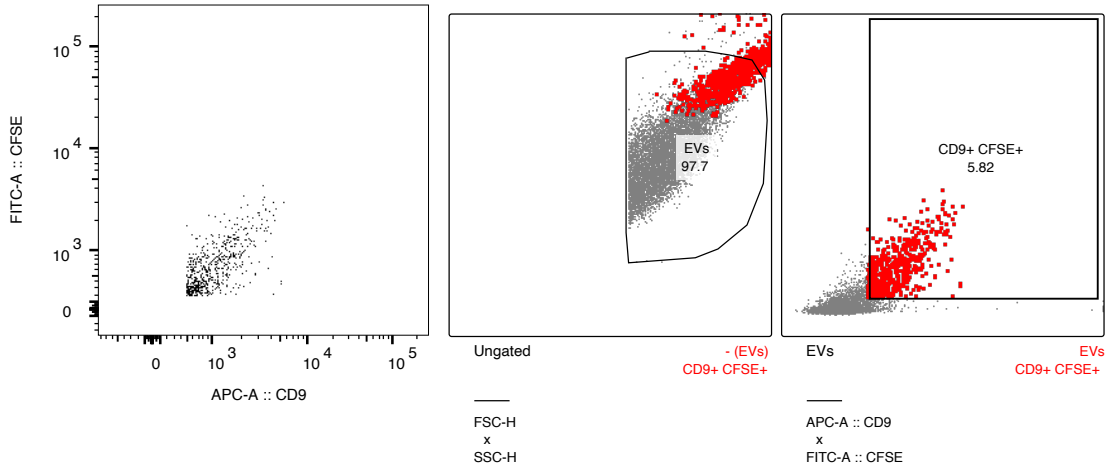

| Sample Name                               | Freq. of EVs |
|-------------------------------------------|--------------|
| Specimen_001_27-2D (IgG staining)_006.fcs | 5.82         |

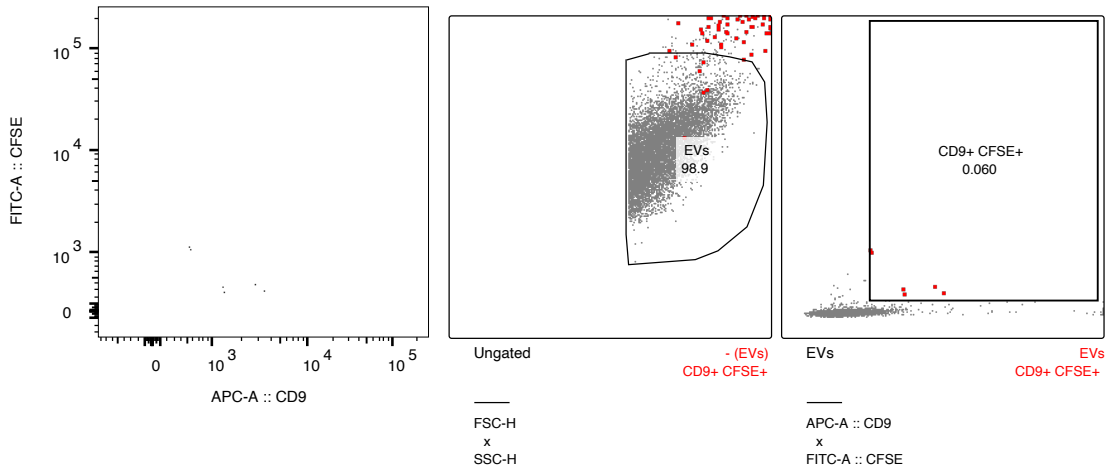

| Sample Name                                | Freq. of EVs |
|--------------------------------------------|--------------|
| Specimen_001_344-2D (IGG staining)_014.fcs | 0.060        |

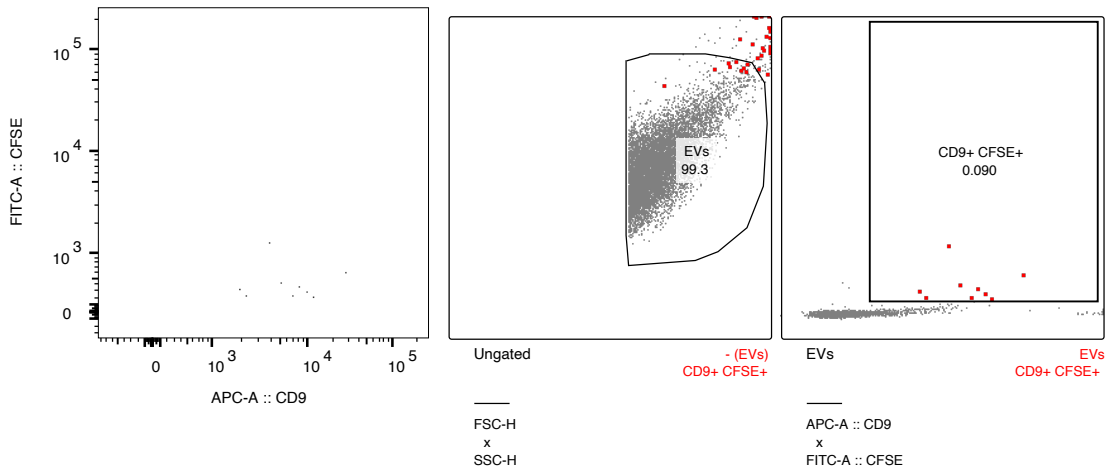

| Sample Name                                 | Freq. of EVs |
|---------------------------------------------|--------------|
| Specimen_001_NP25-2D (IGG staining)_022.fcs | 0.090        |

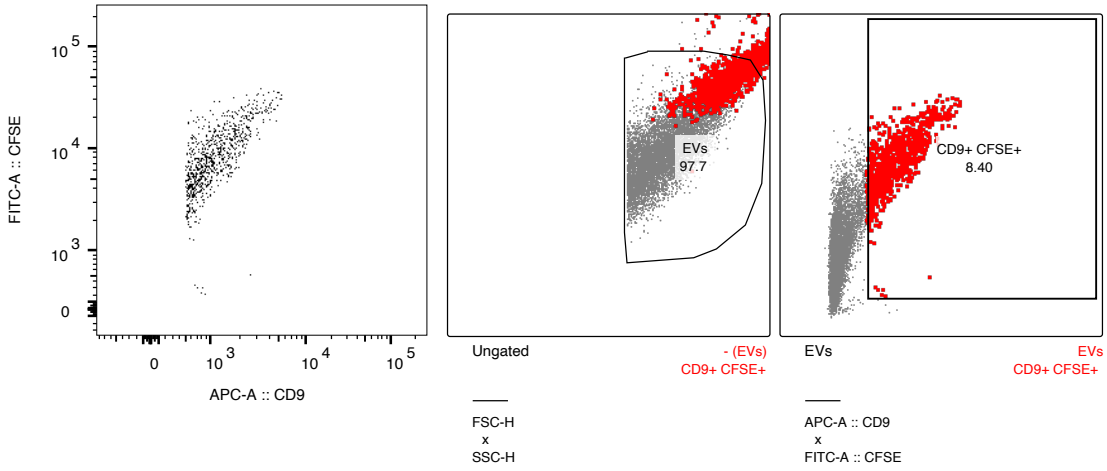

| Sample Name                              | Freq. of EVs |
|------------------------------------------|--------------|
| Specimen_001_27-3D (EV staining)_007.fcs | 8.40         |

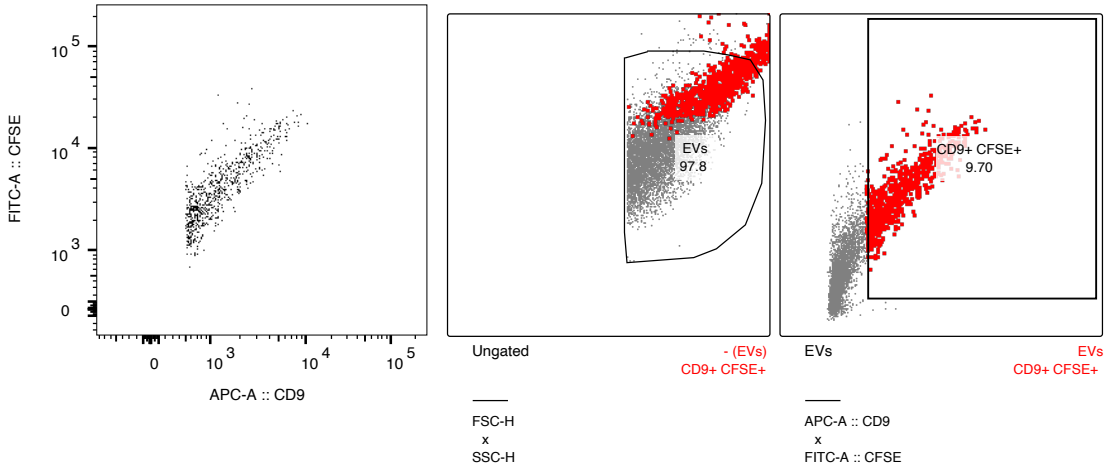

| Sample Name                               | Freq. of EVs |
|-------------------------------------------|--------------|
| Specimen_001_344-3D (EV staining)_015.fcs | 9.70         |

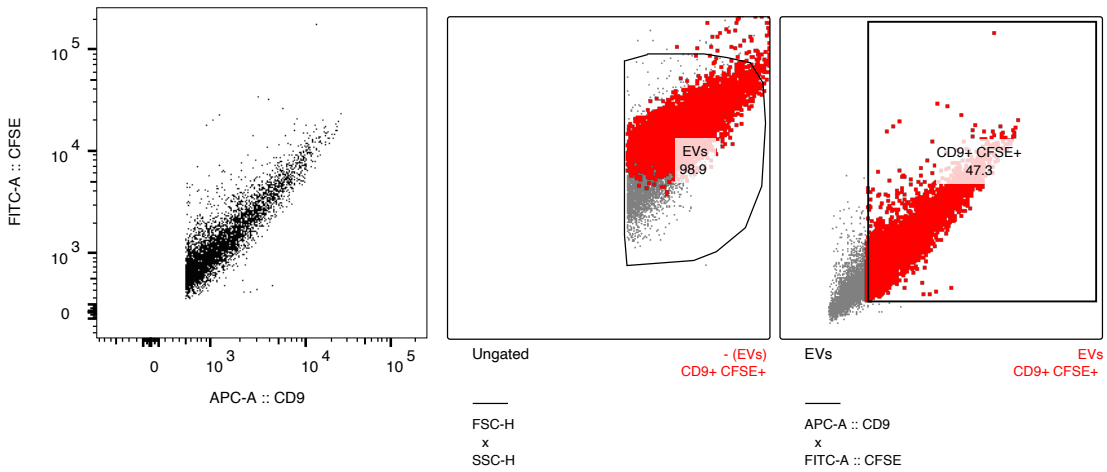

| Sample Name                                | Freq. of EVs |
|--------------------------------------------|--------------|
| Specimen_001_NP25-3D (EV staining)_023.fcs | 47.3         |

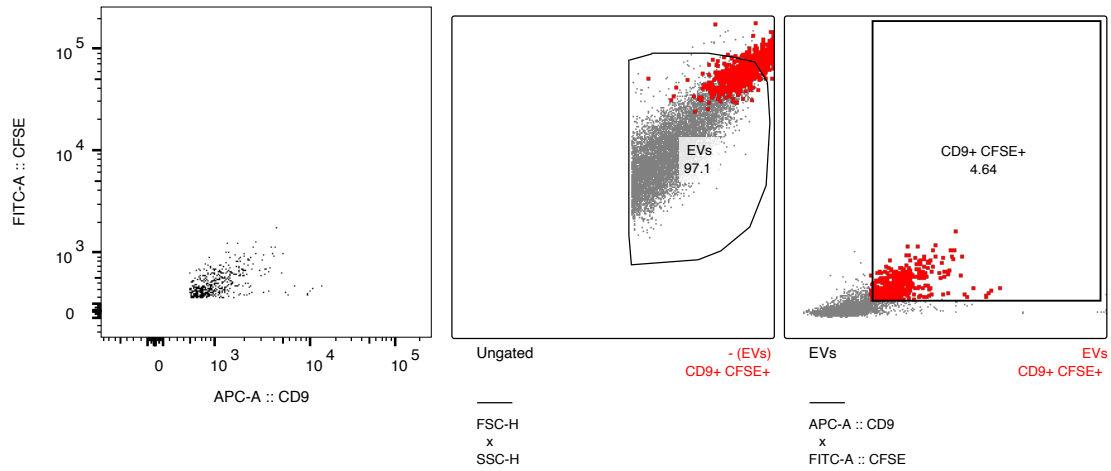

| Sample Name                               | Freq. of EVs |
|-------------------------------------------|--------------|
| Specimen_001_27-3D (IgG staining)_008.fcs | 4.64         |

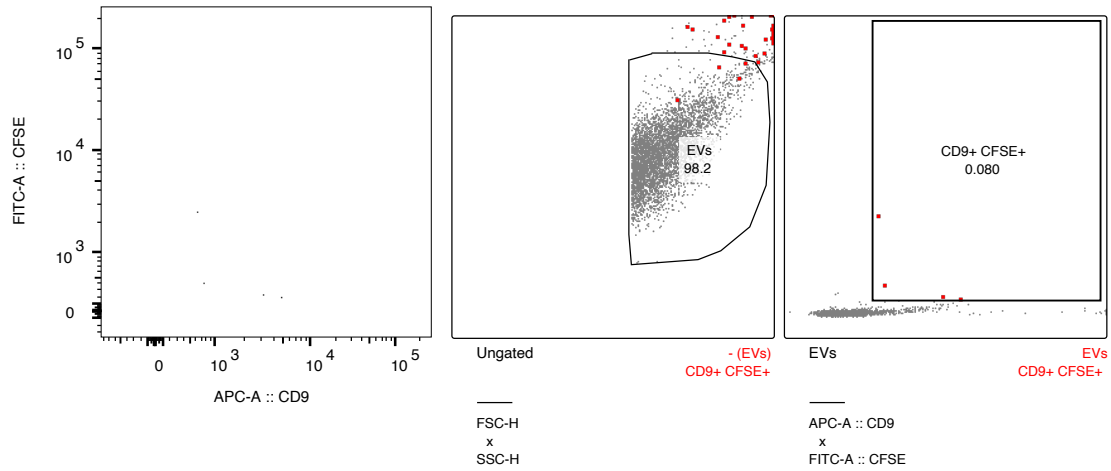

| Sample Name                                | Freq. of EVs |
|--------------------------------------------|--------------|
| Specimen_001_344-3D (IGG staining)_016.fcs | 0.080        |

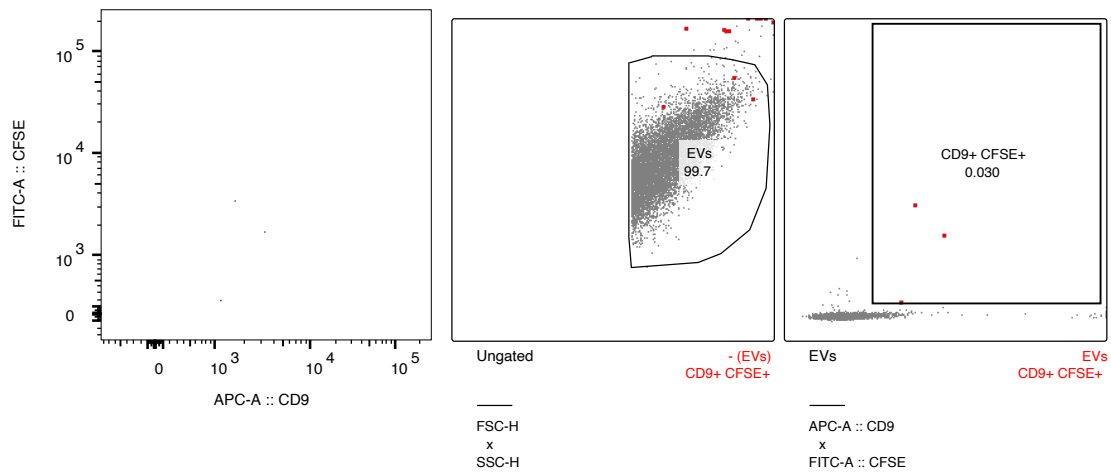

| Sample Name                                 | Freq. of EVs |
|---------------------------------------------|--------------|
| Specimen_001_NP25-3D (IGG staining)_024.fcs | 0.030        |



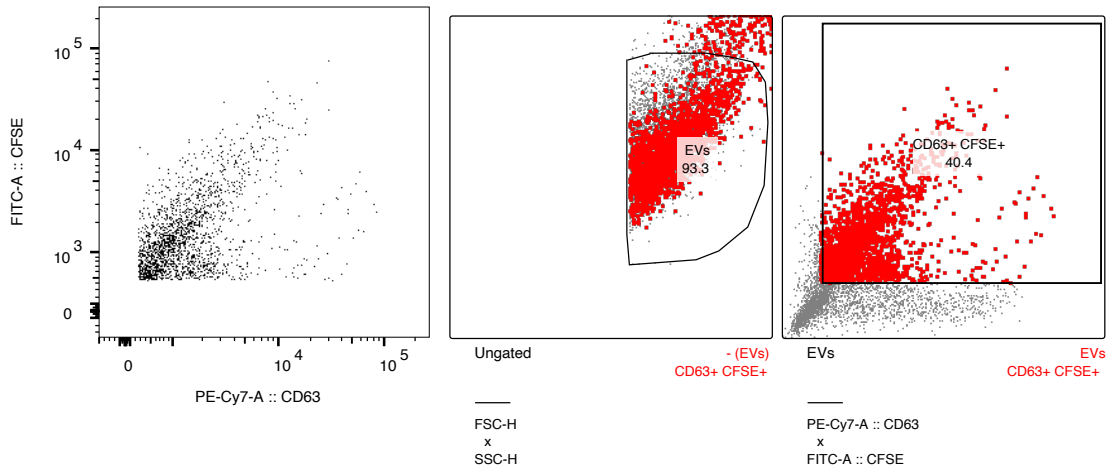

| Sample Name                              | Freq. of EVs |
|------------------------------------------|--------------|
| Specimen_001_21-2D (EV staining)_001.fcs | 40.4         |

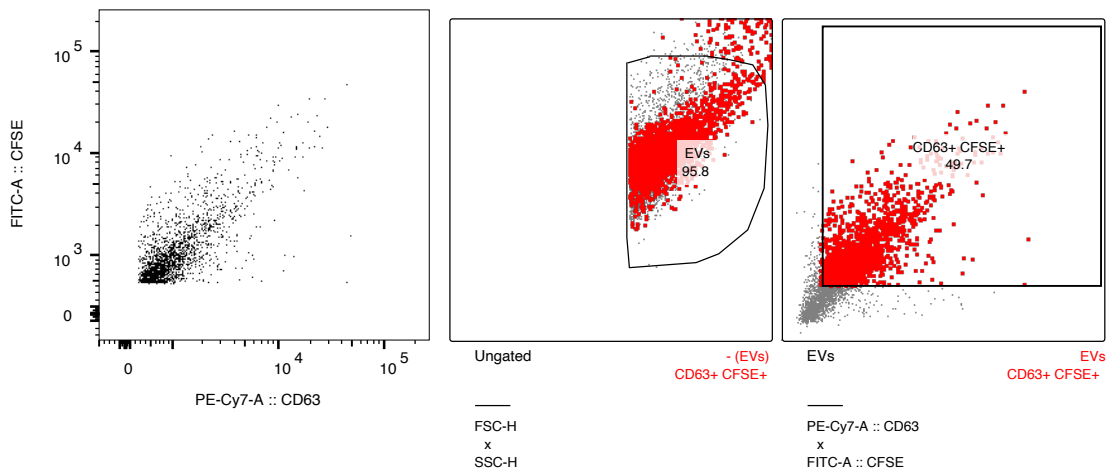

| Sample Name                               | Freq. of EVs |
|-------------------------------------------|--------------|
| Specimen_001_337-2D (EV staining)_009.fcs | 49.7         |

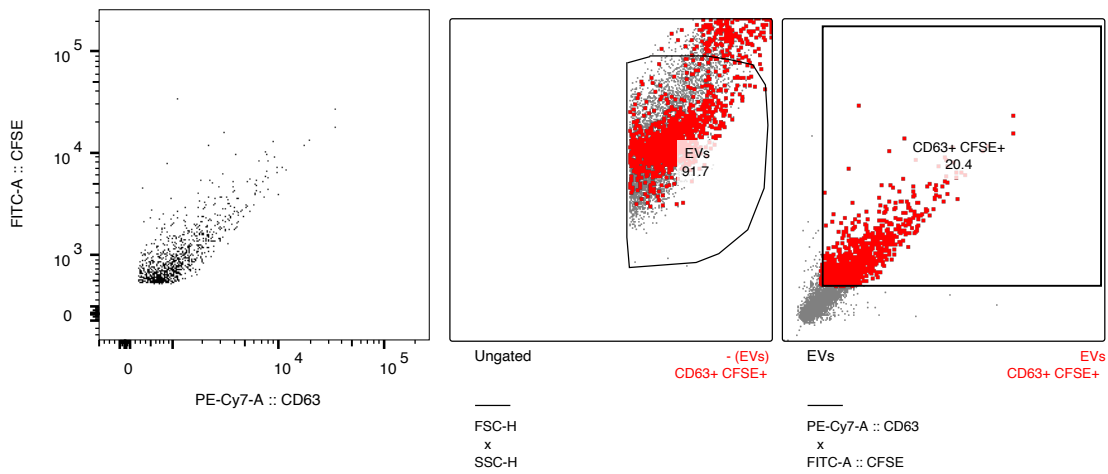

| Sample Name                              | Freq. of EVs |
|------------------------------------------|--------------|
| Specimen_001_57-2D (EV staining)_017.fcs | 20.4         |

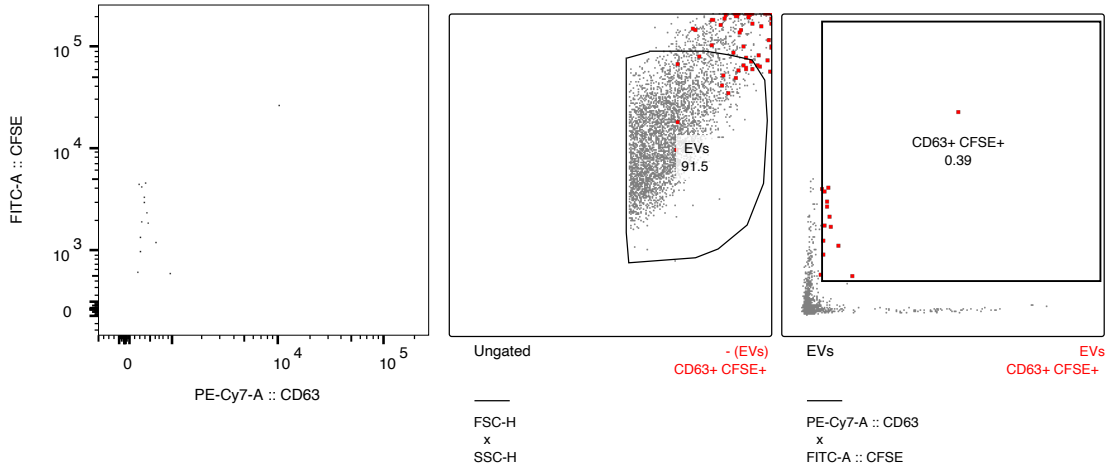

| Sample Name                               | Freq. of EVs |
|-------------------------------------------|--------------|
| Specimen_001_21-2D (IgG staining)_002.fcs | 0.39         |

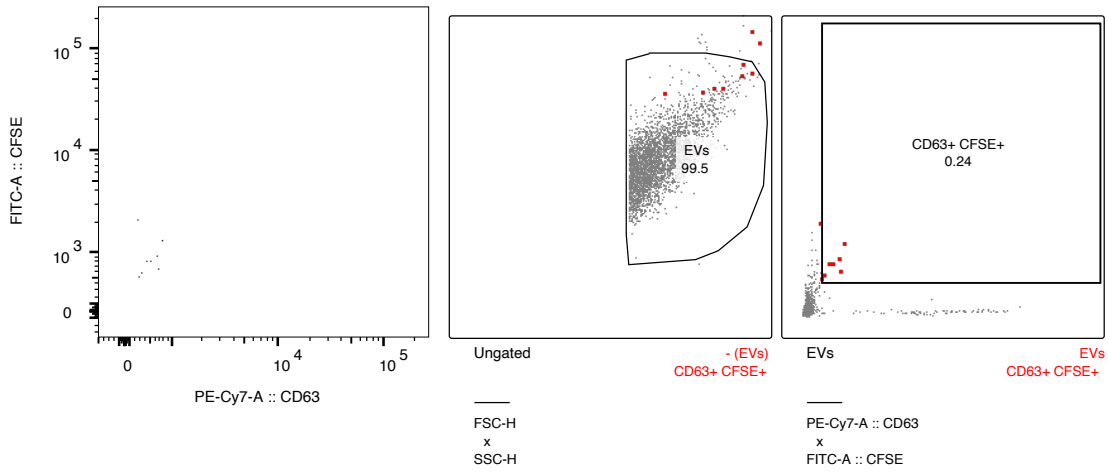

| Sample Name                                | Freq. of EVs |
|--------------------------------------------|--------------|
| Specimen_001_337-2D (IGG staining)_010.fcs | 0.24         |

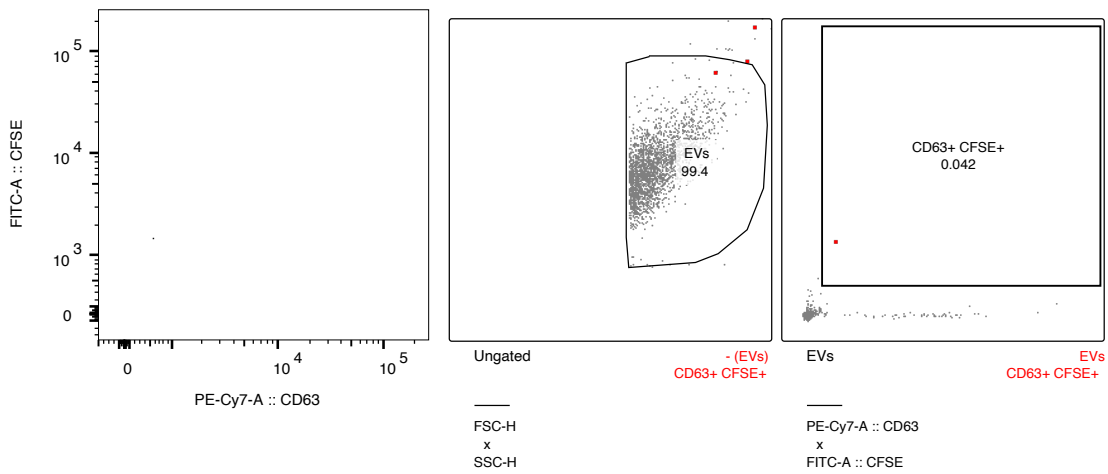

| Sample Name                               | Freq. of EVs |
|-------------------------------------------|--------------|
| Specimen_001_57-2D (IGG staining)_018.fcs | 0.042        |



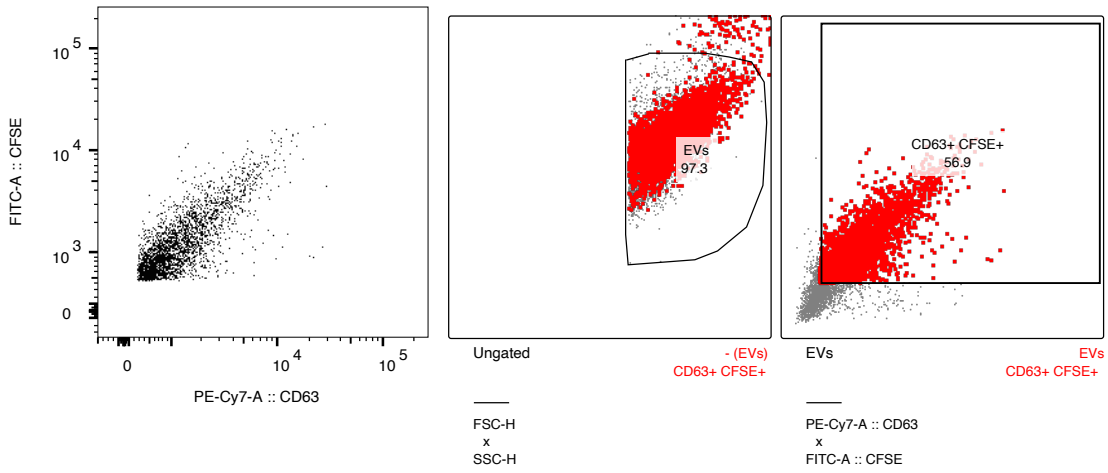

| Sample Name                              | Freq. of EVs |
|------------------------------------------|--------------|
| Specimen_001_21-3D (EV staining)_003.fcs | 56.9         |

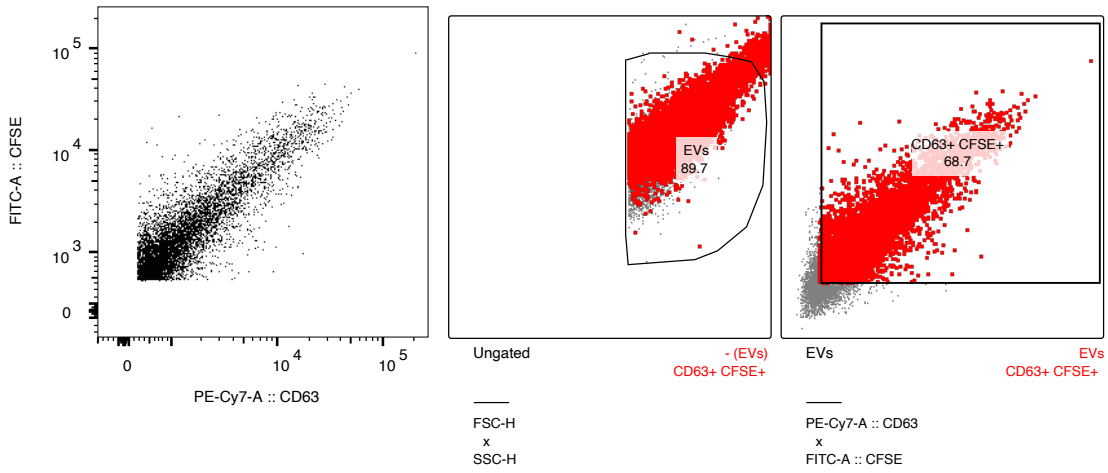

| Sample Name                               | Freq. of EVs |
|-------------------------------------------|--------------|
| Specimen_001_337-3D (EV staining)_011.fcs | 68.7         |

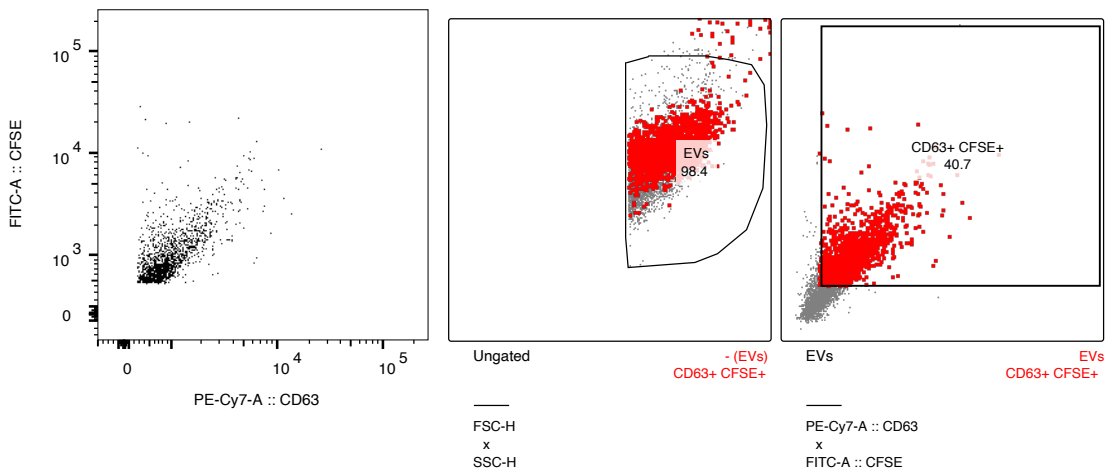

| Sample Name                              | Freq. of EVs |
|------------------------------------------|--------------|
| Specimen_001_57-3D (EV staining)_019.fcs | 40.7         |

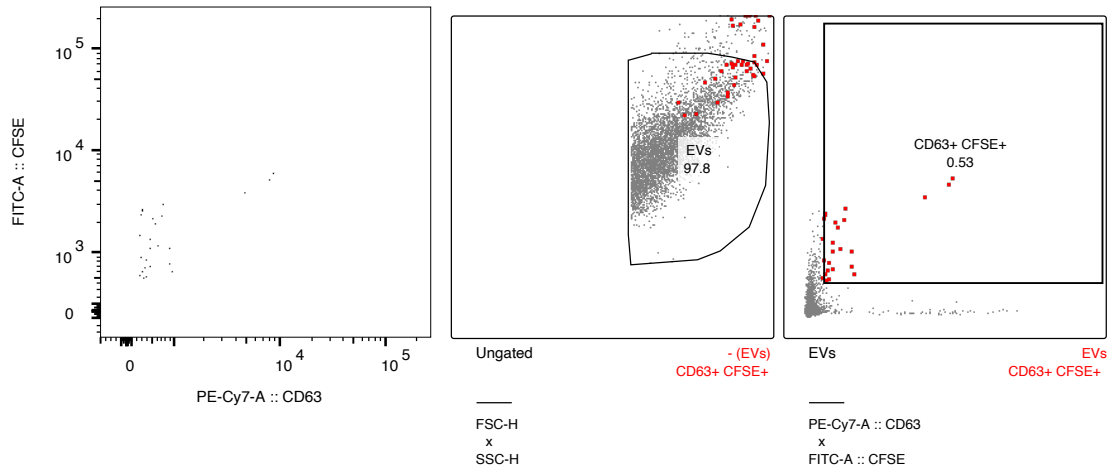

| Sample Name                               | Freq. of EVs |
|-------------------------------------------|--------------|
| Specimen_001_21-3D (IgG staining)_004.fcs | 0.53         |

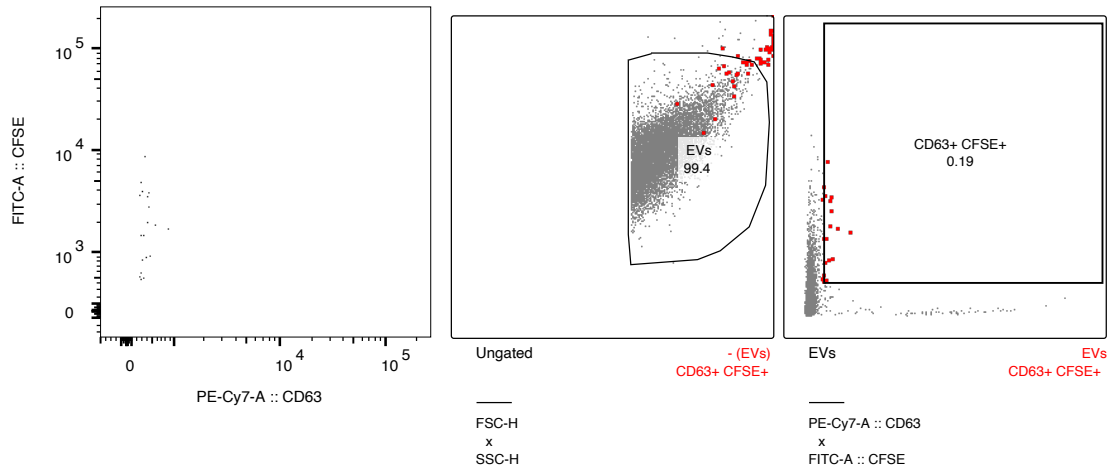

| Sample Name                                | Freq. of EVs |
|--------------------------------------------|--------------|
| Specimen_001_337-3D (IGG staining)_012.fcs | 0.19         |

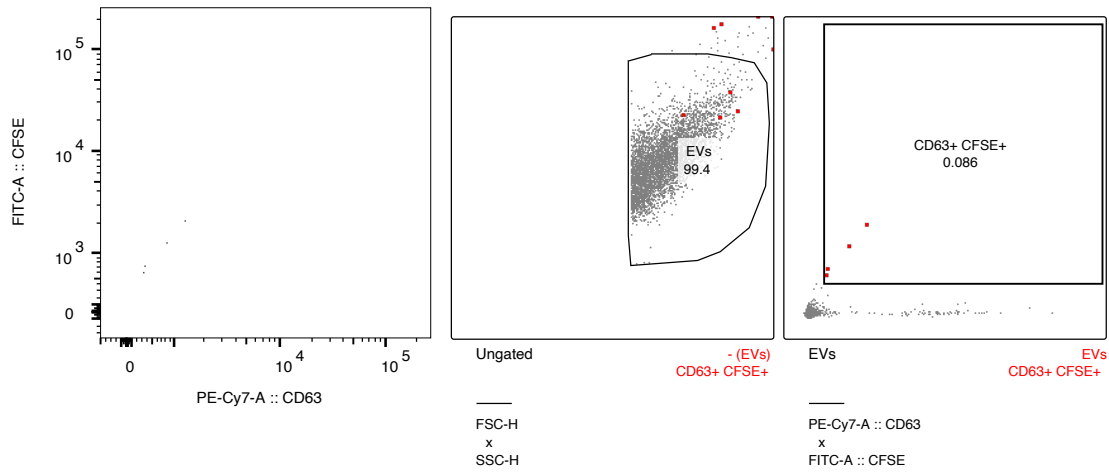

| Sample Name                               | Freq. of EVs |
|-------------------------------------------|--------------|
| Specimen_001_57-3D (IGG staining)_020.fcs | 0.086        |

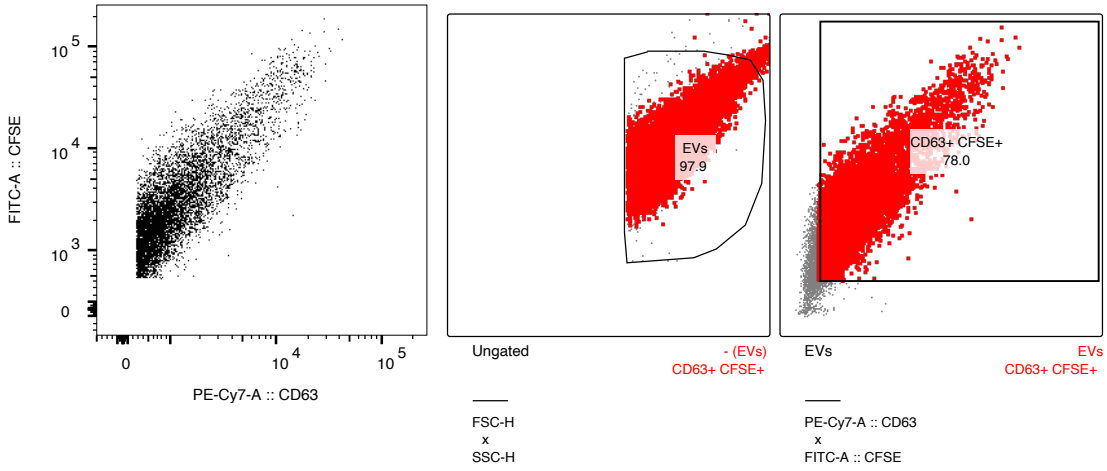

| Sample Name                              | Freq. of EVs |
|------------------------------------------|--------------|
| Specimen_001_27-2D (EV staining)_005.fcs | 78.0         |

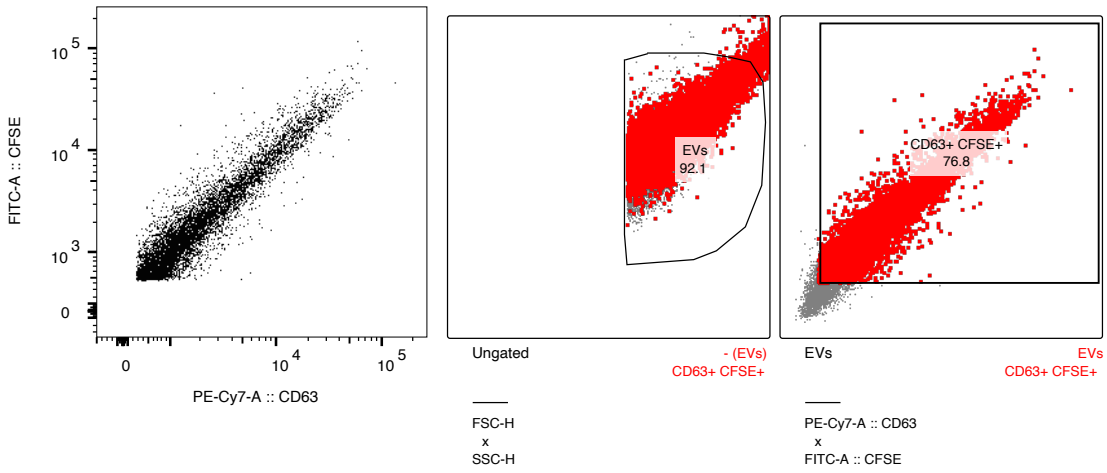

| Sample Name                               | Freq. of EVs |
|-------------------------------------------|--------------|
| Specimen_001_344-2D (EV staining)_013.fcs | 76.8         |

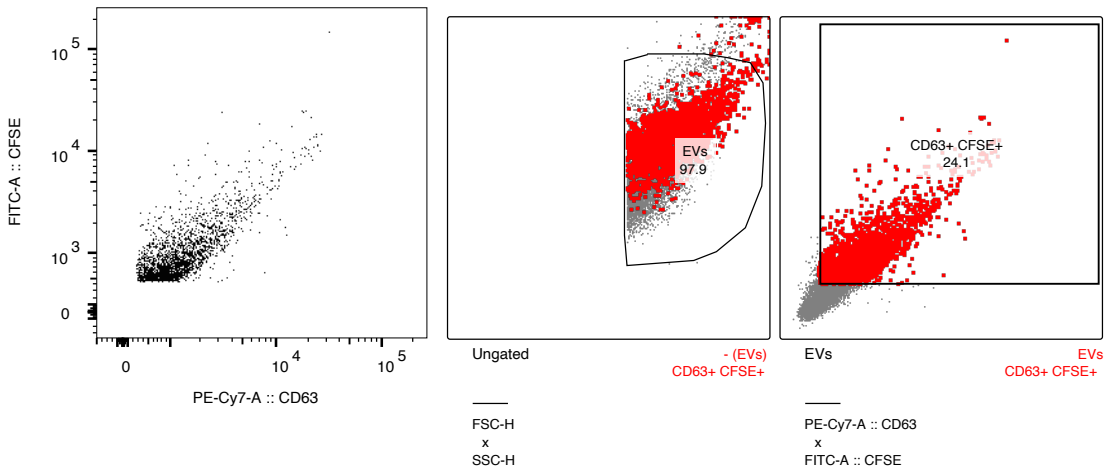

| Sample Name                                | Freq. of EVs |
|--------------------------------------------|--------------|
| Specimen_001_NP25-2D (EV staining)_021.fcs | 24.1         |

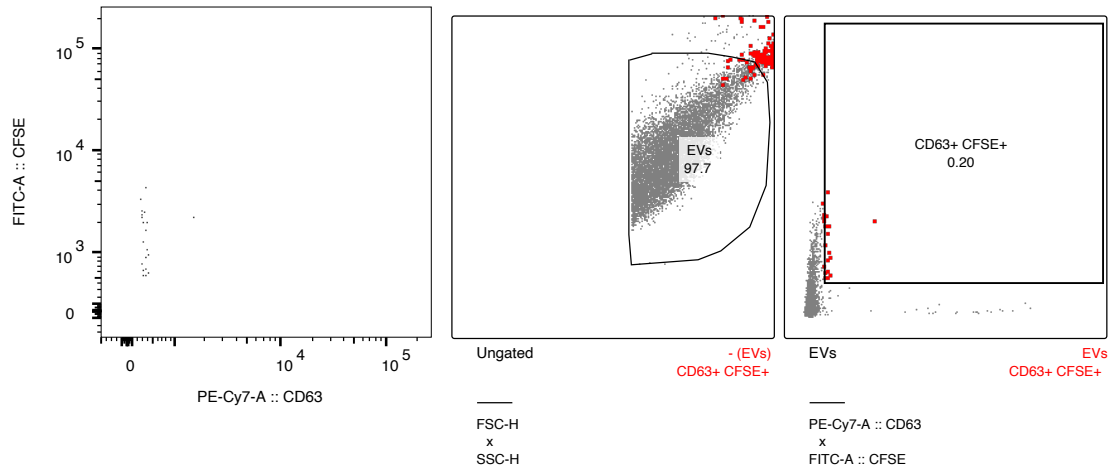

| Sample Name                               | Freq. of EVs |
|-------------------------------------------|--------------|
| Specimen_001_27-2D (IgG staining)_006.fcs | 0.20         |

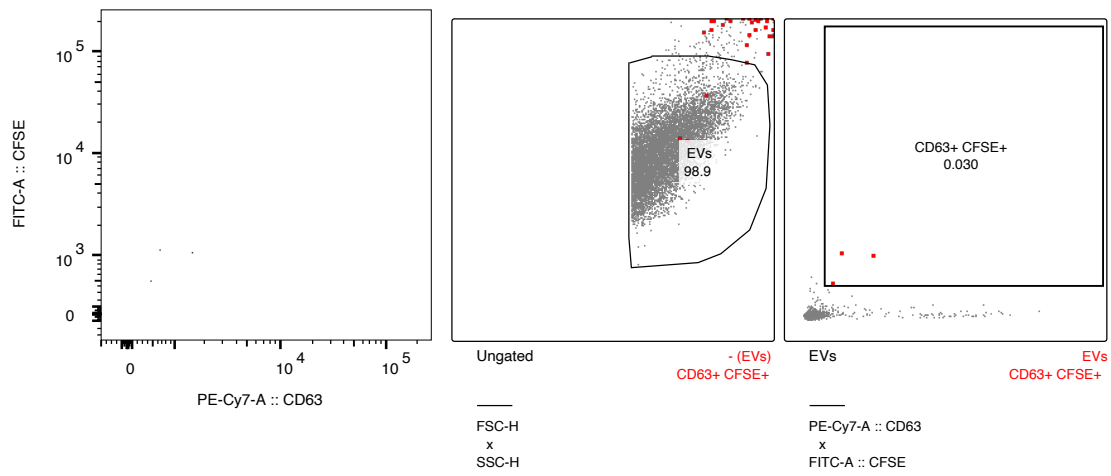

| Sample Name                                | Freq. of EVs |
|--------------------------------------------|--------------|
| Specimen_001_344-2D (IGG staining)_014.fcs | 0.030        |

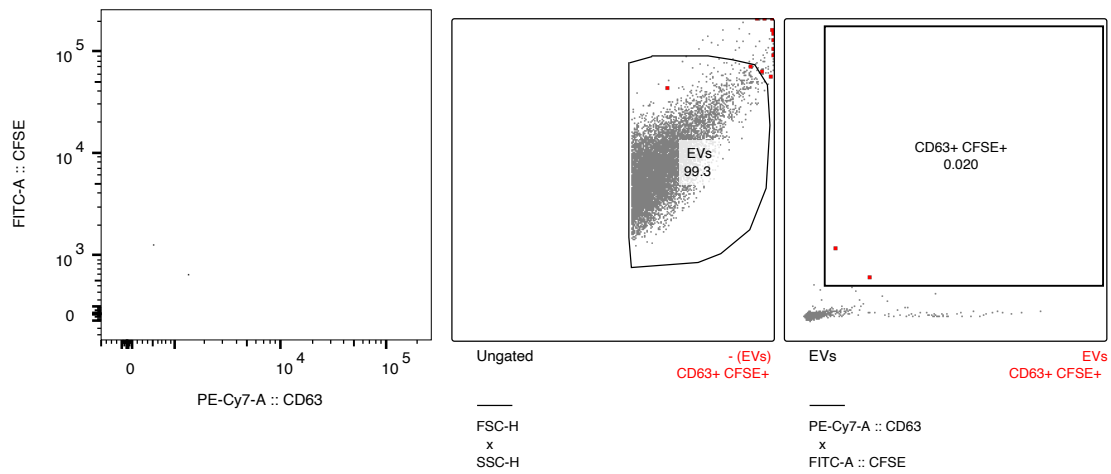

| Sample Name                                 | Freq. of EVs |
|---------------------------------------------|--------------|
| Specimen_001_NP25-2D (IGG staining)_022.fcs | 0.020        |

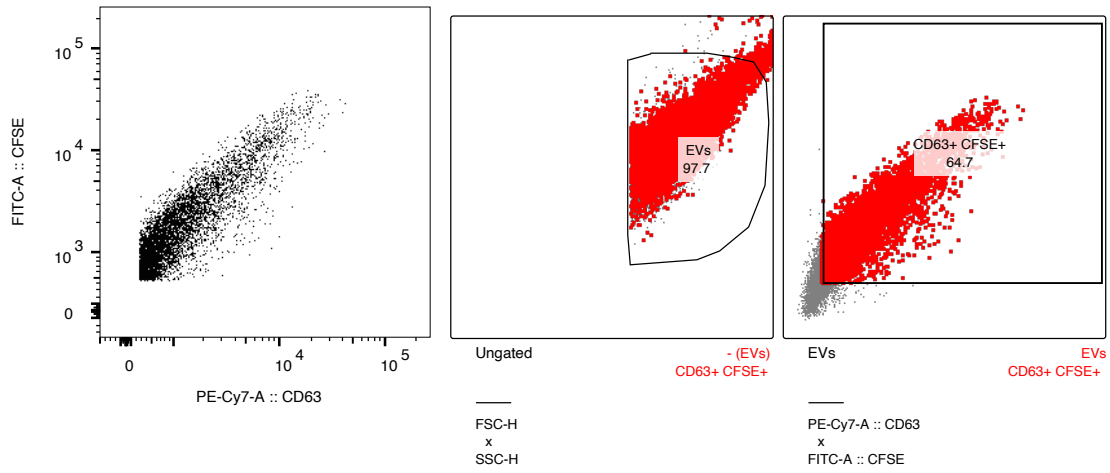

| Sample Name                              | Freq. of EVs |
|------------------------------------------|--------------|
| Specimen_001_27-3D (EV staining)_007.fcs | 64.7         |

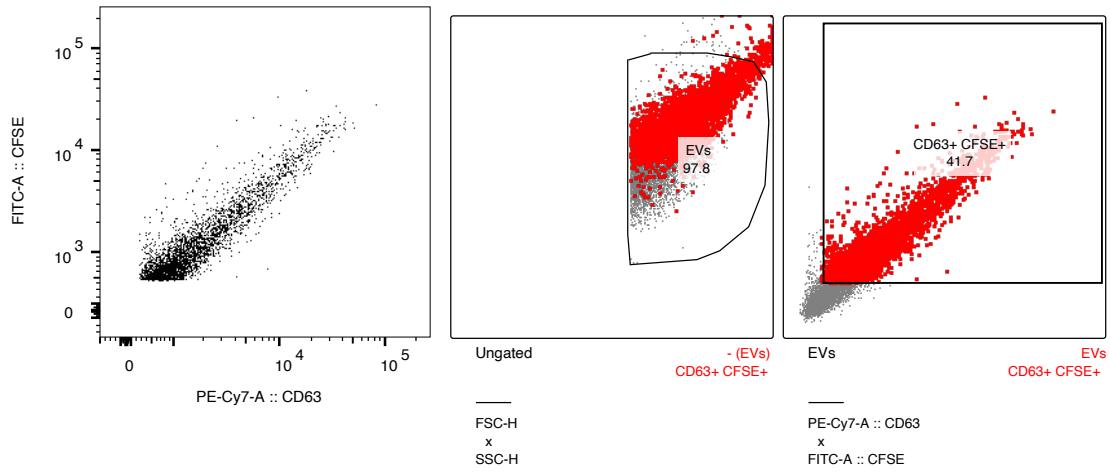

| Sample Name                               | Freq. of EVs |
|-------------------------------------------|--------------|
| Specimen_001_344-3D (EV staining)_015.fcs | 41.7         |

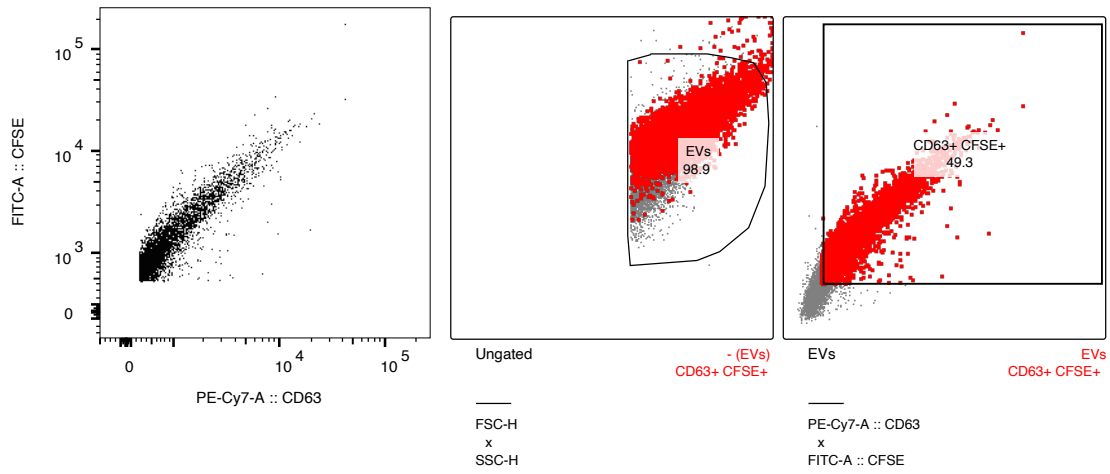

| Sample Name                                | Freq. of EVs |
|--------------------------------------------|--------------|
| Specimen_001_NP25-3D (EV staining)_023.fcs | 49.3         |

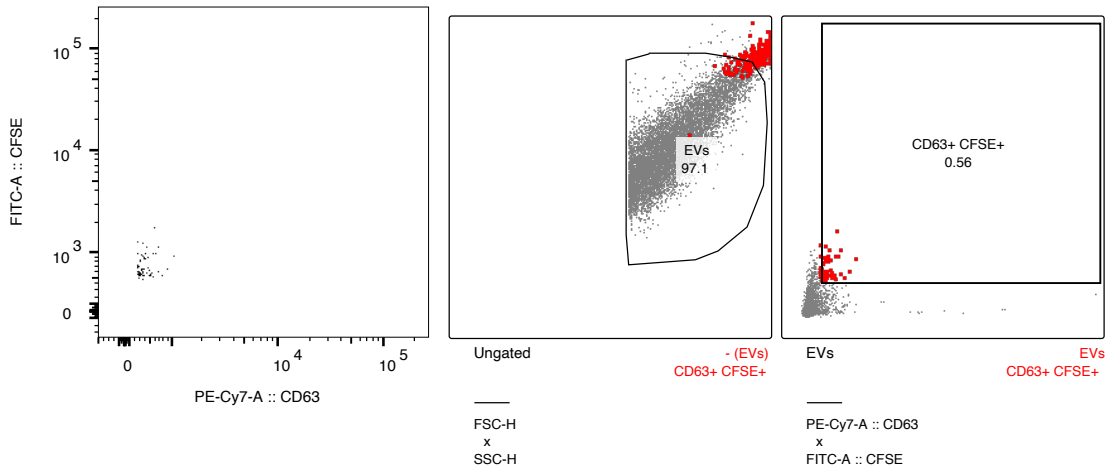

| Sample Name                               | Freq. of EVs |
|-------------------------------------------|--------------|
| Specimen_001_27-3D (IgG staining)_008.fcs | 0.56         |

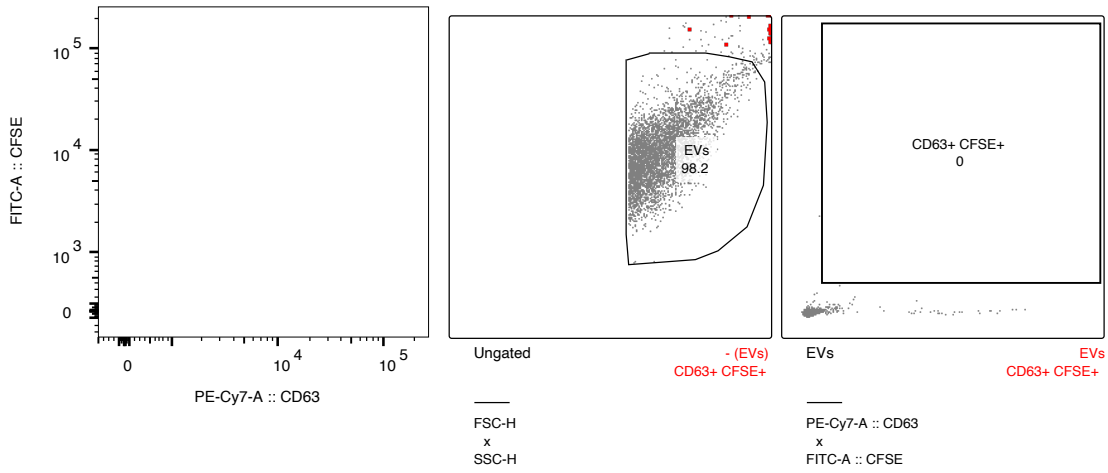

| Sample Name                                | Freq. of EVs |
|--------------------------------------------|--------------|
| Specimen_001_344-3D (IGG staining)_016.fcs | 0            |

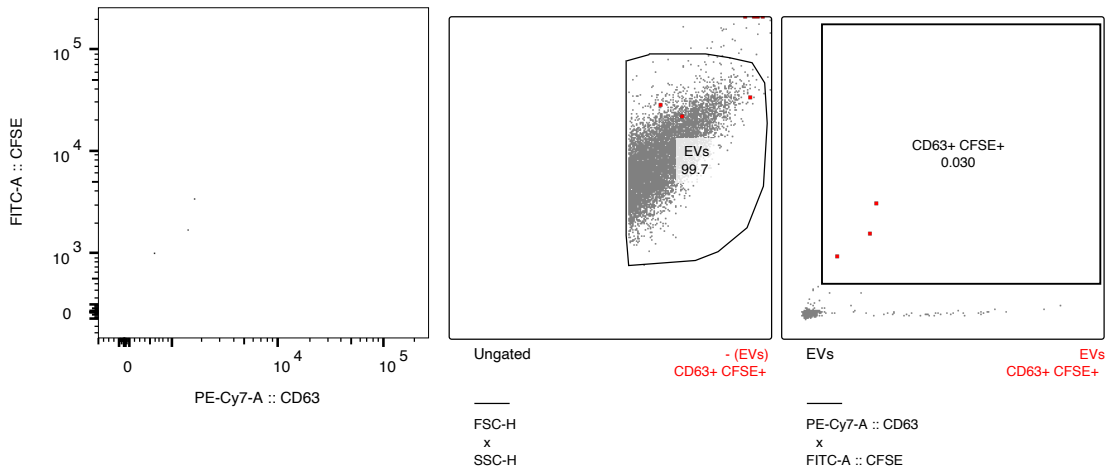

| Sample Name                                 | Freq. of EVs |
|---------------------------------------------|--------------|
| Specimen_001_NP25-3D (IGG staining)_024.fcs | 0.030        |



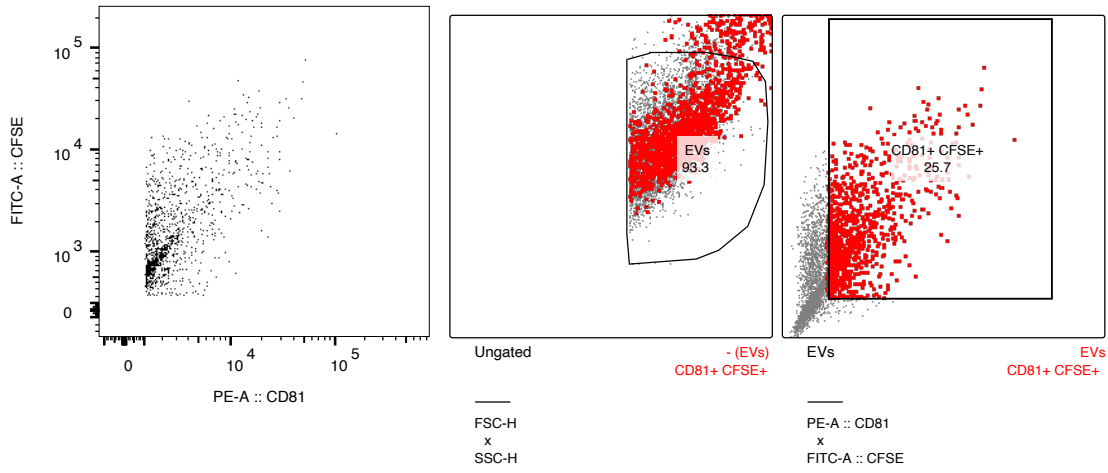

| Sample Name                              | Freq. of EVs |
|------------------------------------------|--------------|
| Specimen_001_21-2D (EV staining)_001.fcs | 25.7         |

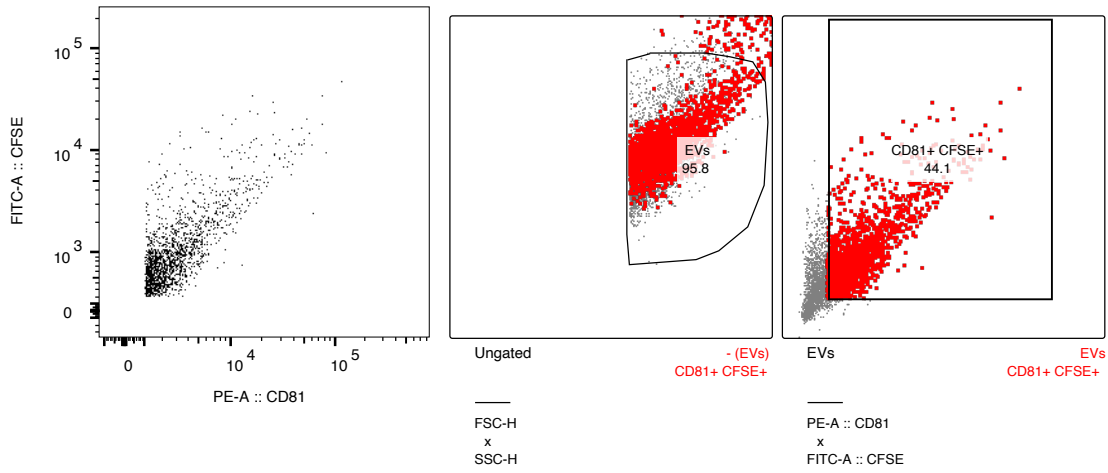

| Sample Name                               | Freq. of EVs |
|-------------------------------------------|--------------|
| Specimen_001_337-2D (EV staining)_009.fcs | 44.1         |

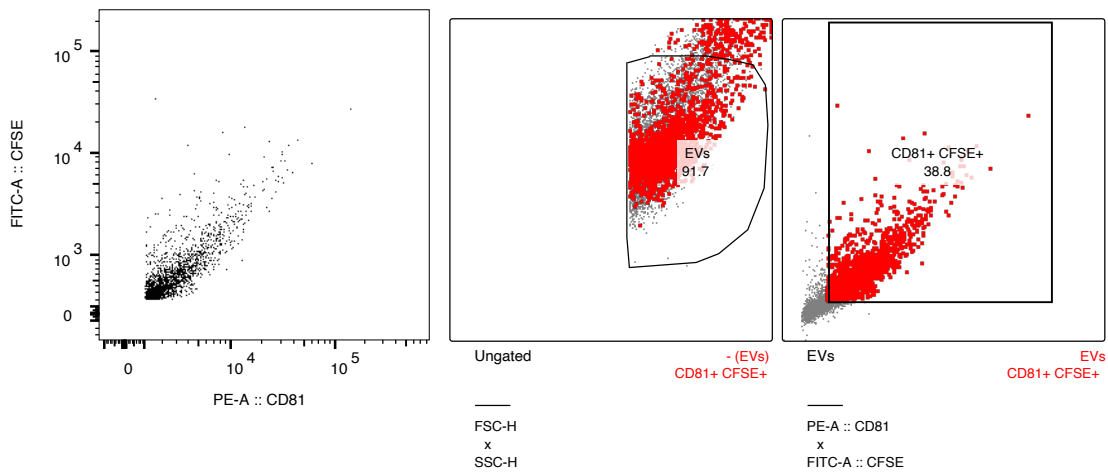

| Sample Name                              | Freq. of EVs |
|------------------------------------------|--------------|
| Specimen_001_57-2D (EV staining)_017.fcs | 38.8         |



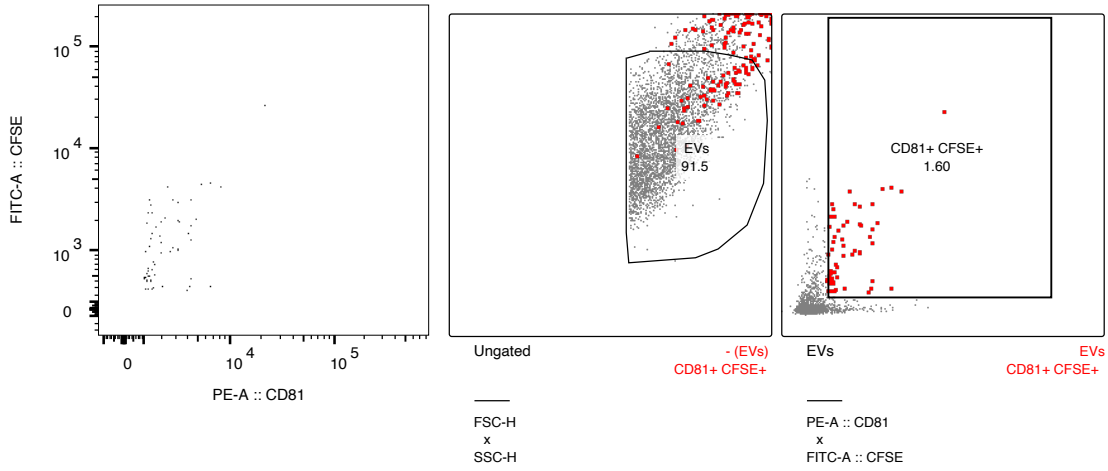

| Sample Name                               | Freq. of EVs |
|-------------------------------------------|--------------|
| Specimen_001_21-2D (IgG staining)_002.fcs | 1.60         |

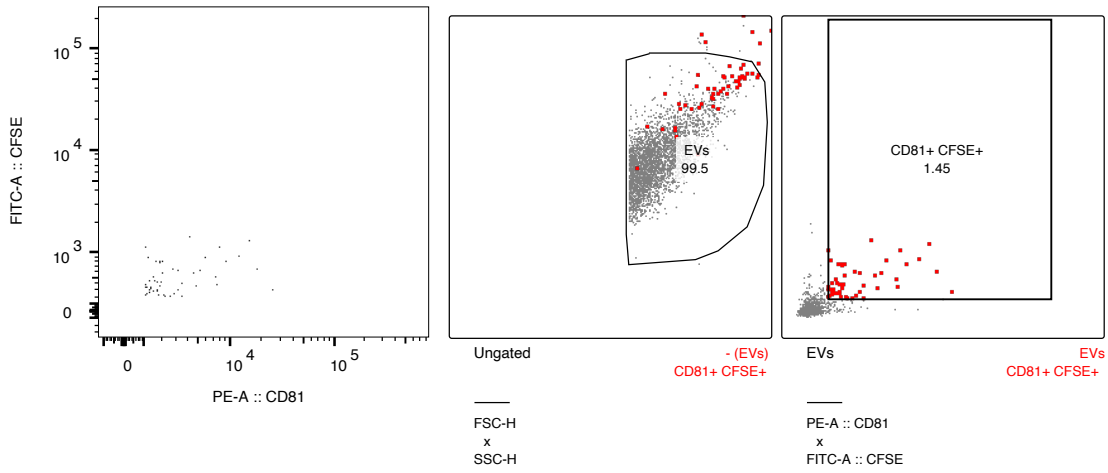

| Sample Name                                | Freq. of EVs |
|--------------------------------------------|--------------|
| Specimen_001_337-2D (IGG staining)_010.fcs | 1.45         |

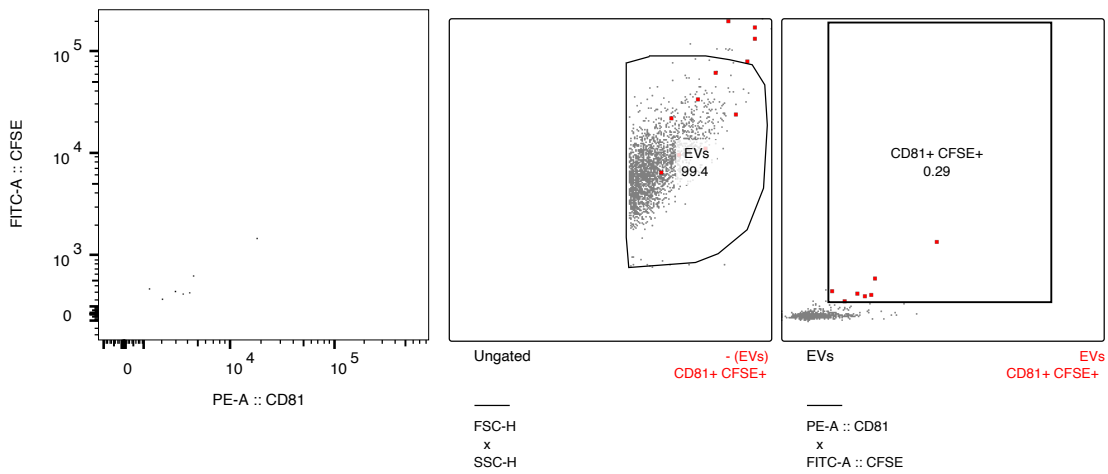

| Sample Name                               | Freq. of EVs |
|-------------------------------------------|--------------|
| Specimen_001_57-2D (IGG staining)_018.fcs | 0.29         |

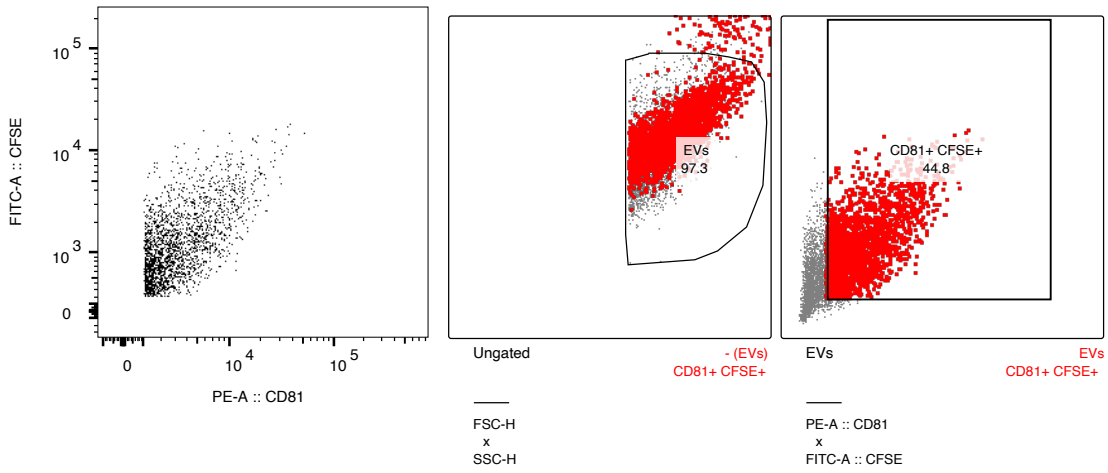

| Sample Name                              | Freq. of EVs |
|------------------------------------------|--------------|
| Specimen_001_21-3D (EV staining)_003.fcs | 44.8         |

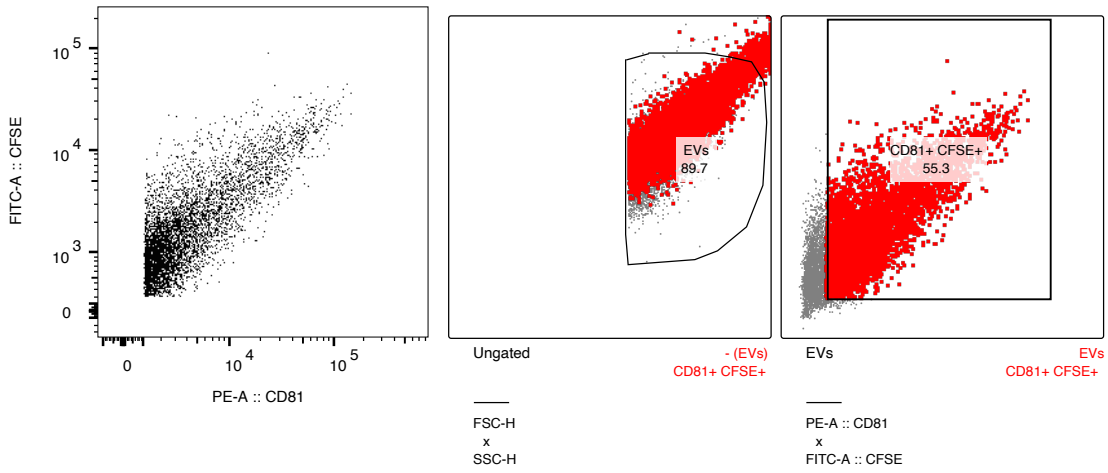

| Sample Name                               | Freq. of EVs |
|-------------------------------------------|--------------|
| Specimen_001_337-3D (EV staining)_011.fcs | 55.3         |

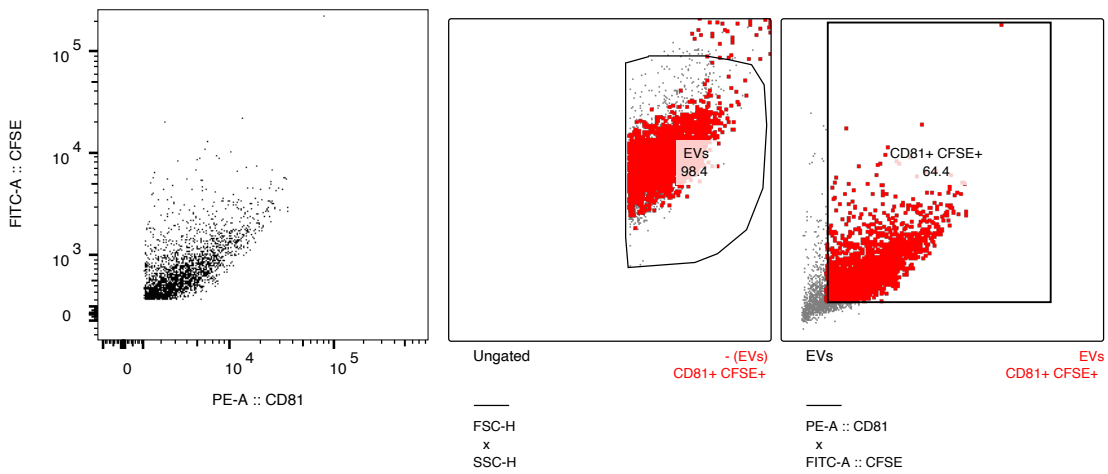

| Sample Name                              | Freq. of EVs |
|------------------------------------------|--------------|
| Specimen_001_57-3D (EV staining)_019.fcs | 64.4         |

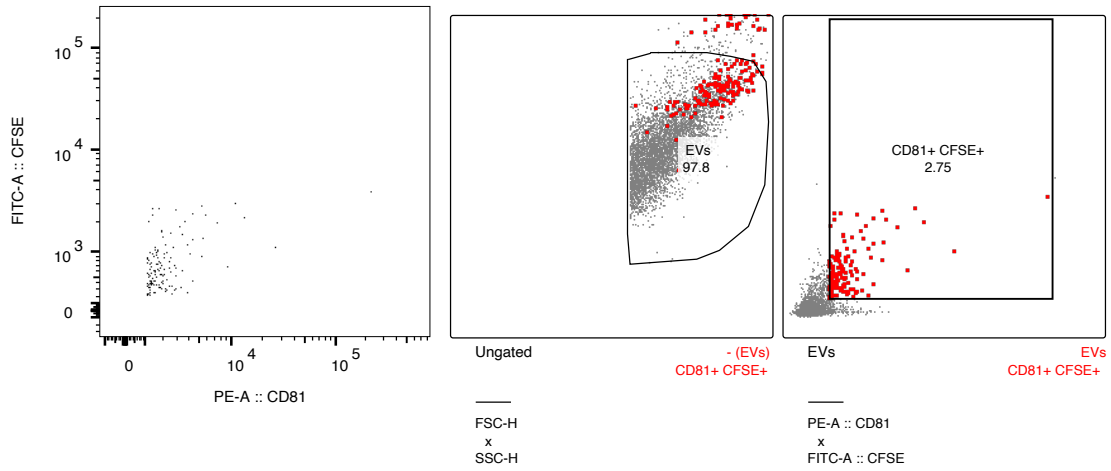

| Sample Name                               | Freq. of EVs |
|-------------------------------------------|--------------|
| Specimen_001_21-3D (IgG staining)_004.fcs | 2.75         |

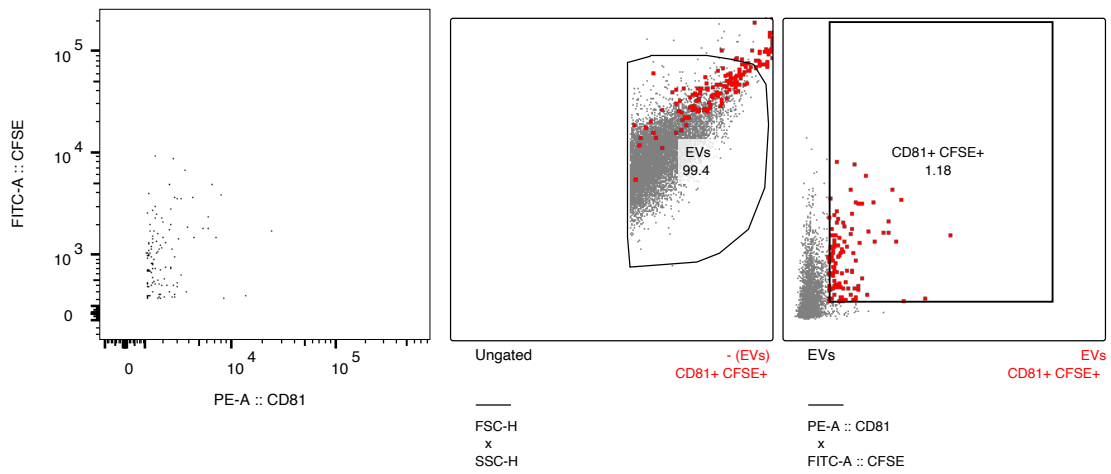

| Sample Name                                | Freq. of EVs |
|--------------------------------------------|--------------|
| Specimen_001_337-3D (IGG staining)_012.fcs | 1.18         |

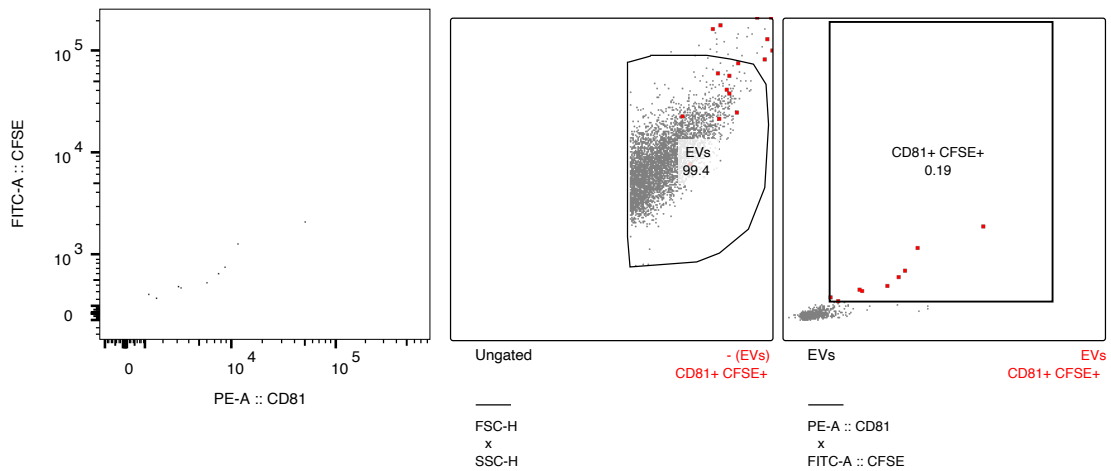

| Sample Name                               | Freq. of EVs |
|-------------------------------------------|--------------|
| Specimen_001_57-3D (IGG staining)_020.fcs | 0.19         |

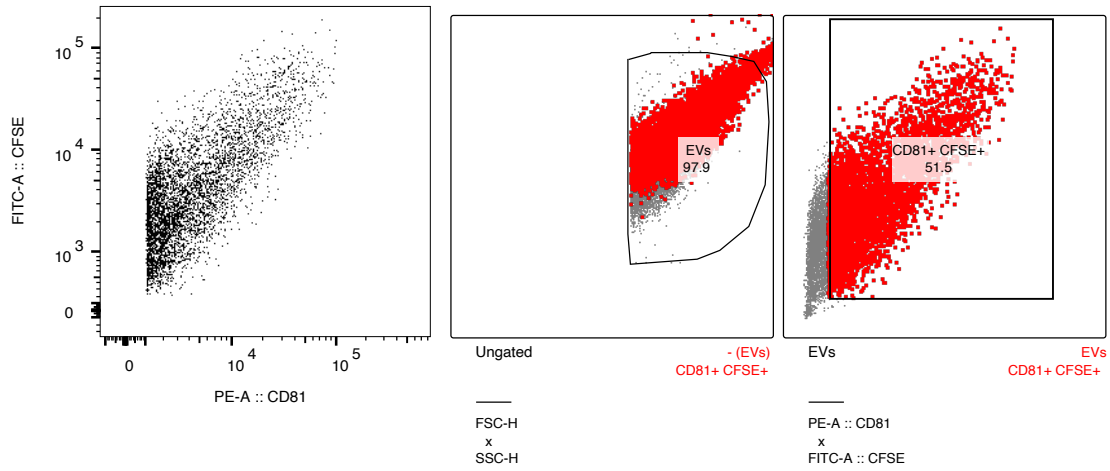

| Sample Name                              | Freq. of EVs |
|------------------------------------------|--------------|
| Specimen_001_27-2D (EV staining)_005.fcs | 51.5         |

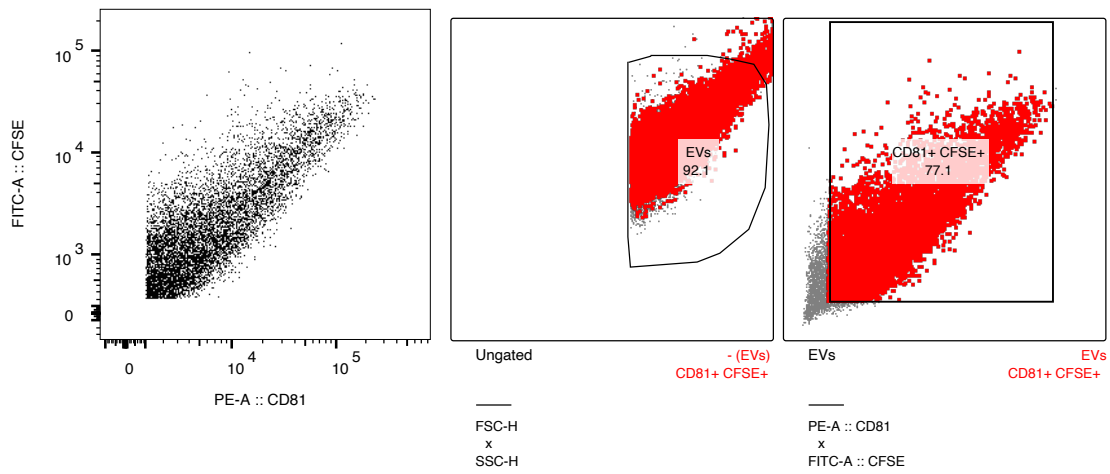

| Sample Name                               | Freq. of EVs |
|-------------------------------------------|--------------|
| Specimen_001_344-2D (EV staining)_013.fcs | 77.1         |

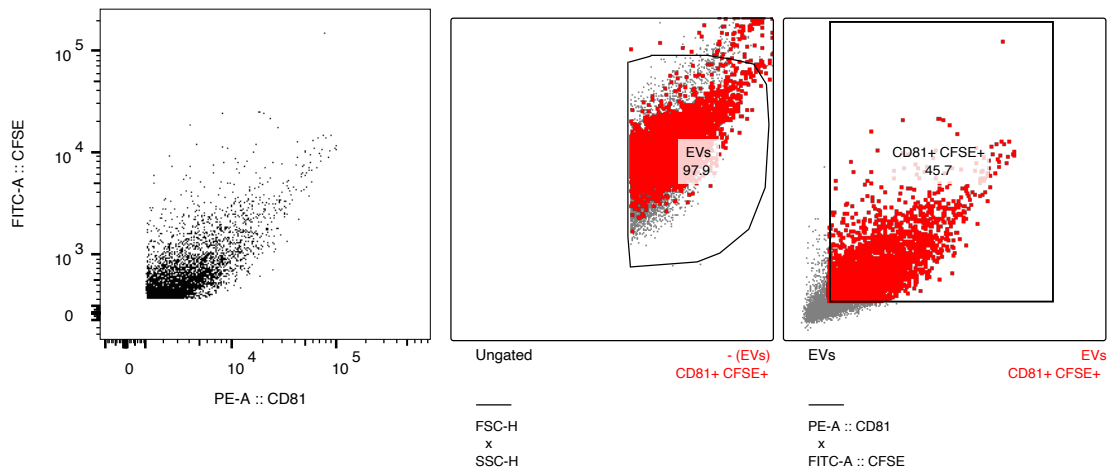

| Sample Name                                | Freq. of EVs |
|--------------------------------------------|--------------|
| Specimen_001_NP25-2D (EV staining)_021.fcs | 45.7         |

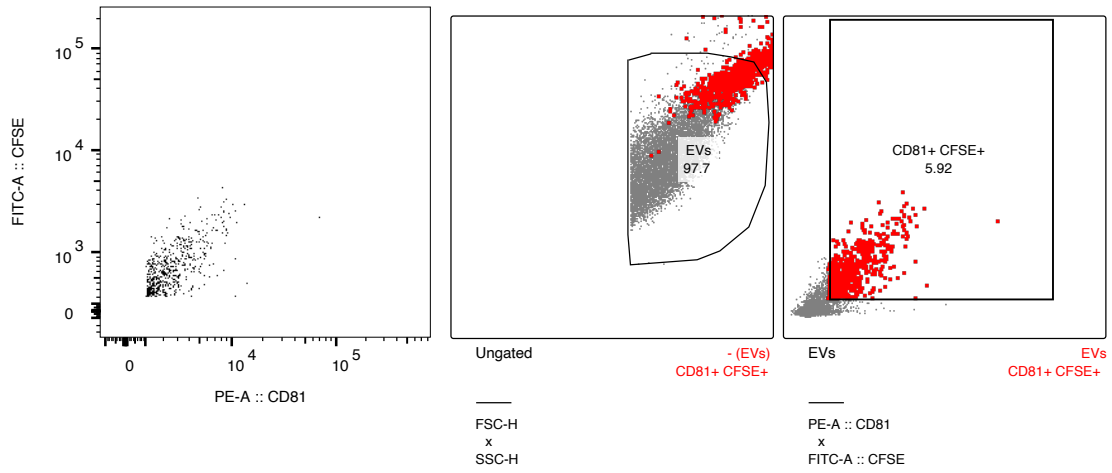

| Sample Name                               | Freq. of EVs |
|-------------------------------------------|--------------|
| Specimen_001_27-2D (IgG staining)_006.fcs | 5.92         |

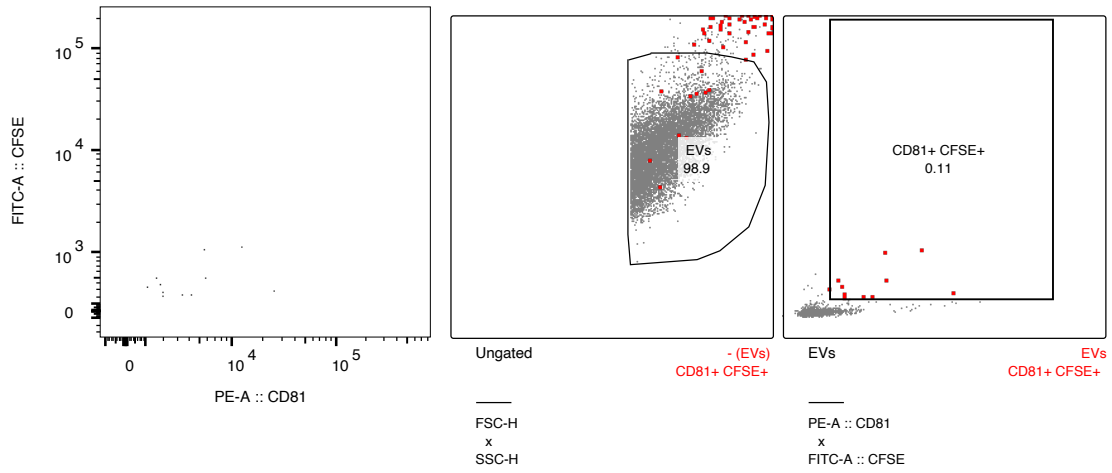

| Sample Name                                | Freq. of EVs |
|--------------------------------------------|--------------|
| Specimen_001_344-2D (IGG staining)_014.fcs | 0.11         |

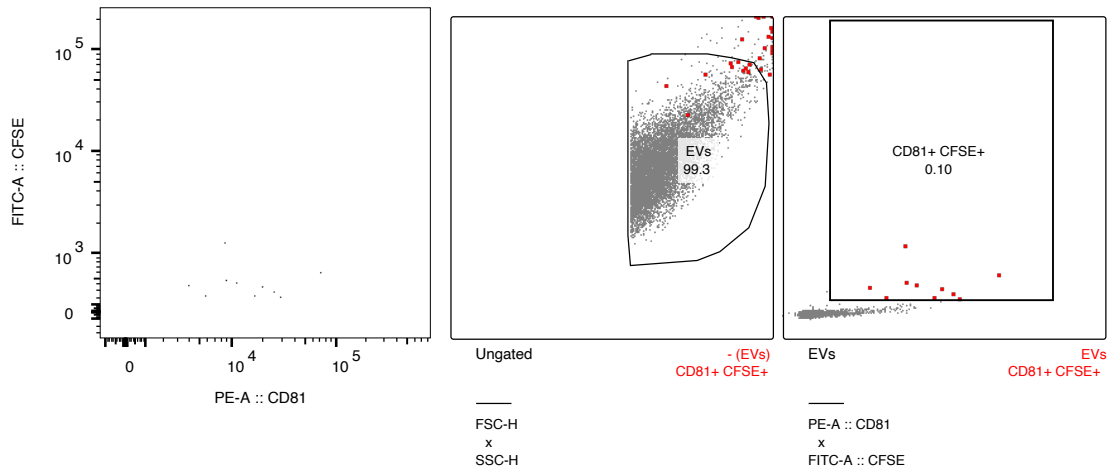

| Sample Name                                 | Freq. of EVs |
|---------------------------------------------|--------------|
| Specimen_001_NP25-2D (IGG staining)_022.fcs | 0.10         |

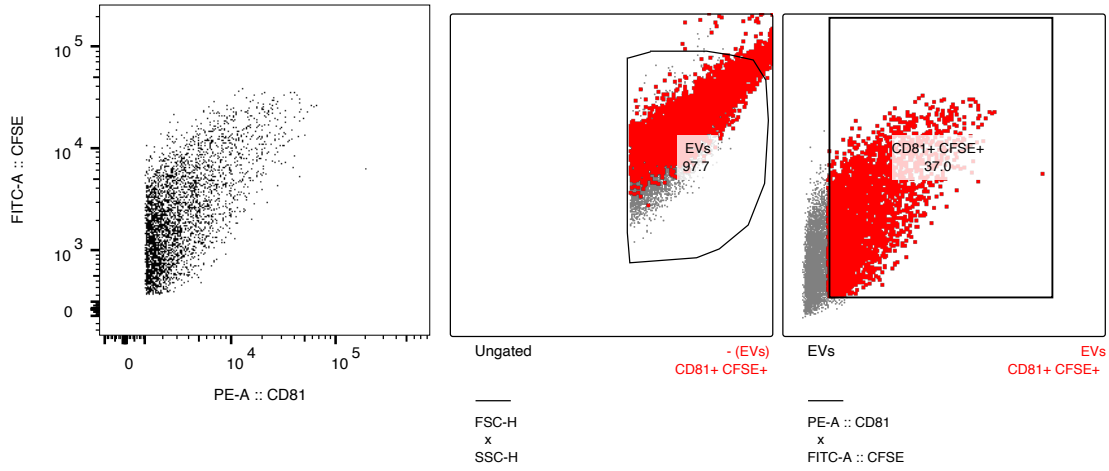

| Sample Name                              | Freq. of EVs |
|------------------------------------------|--------------|
| Specimen_001_27-3D (EV staining)_007.fcs | 37.0         |

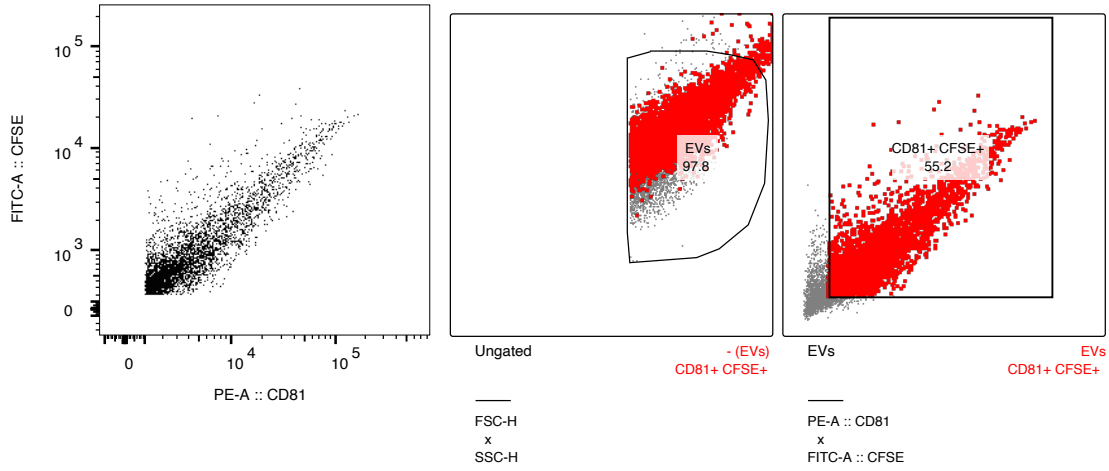

| Sample Name                               | Freq. of EVs |
|-------------------------------------------|--------------|
| Specimen_001_344-3D (EV staining)_015.fcs | 55.2         |

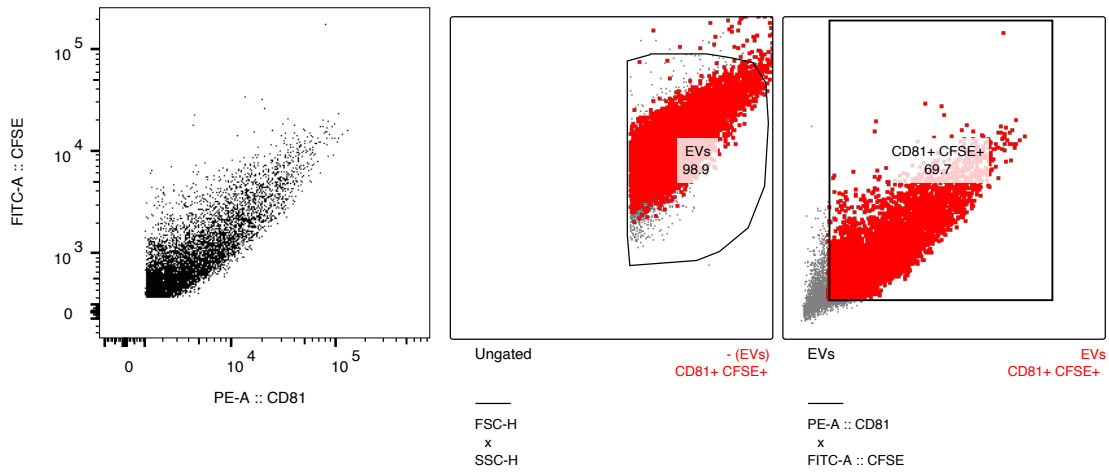

| Sample Name                                | Freq. of EVs |
|--------------------------------------------|--------------|
| Specimen_001_NP25-3D (EV staining)_023.fcs | 69.7         |

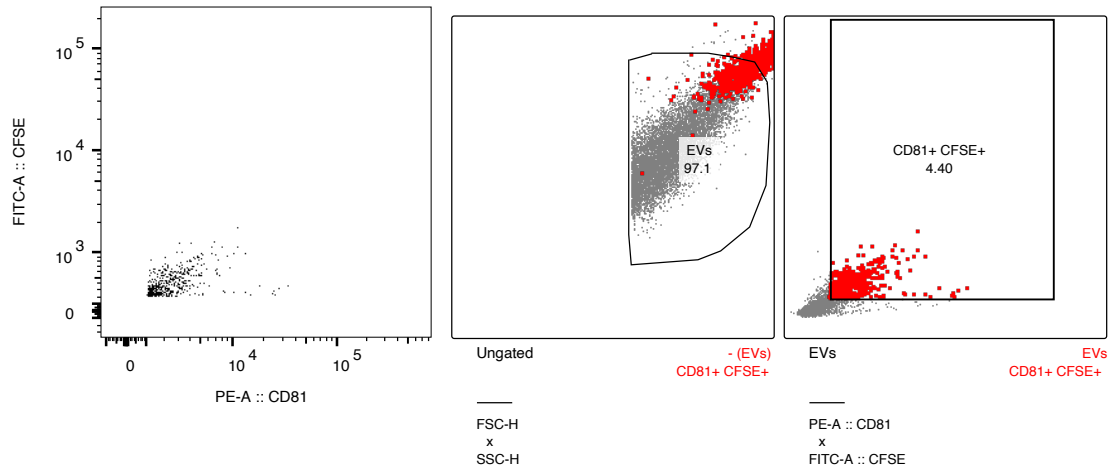

| Sample Name                               | Freq. of EVs |
|-------------------------------------------|--------------|
| Specimen_001_27-3D (IgG staining)_008.fcs | 4.40         |

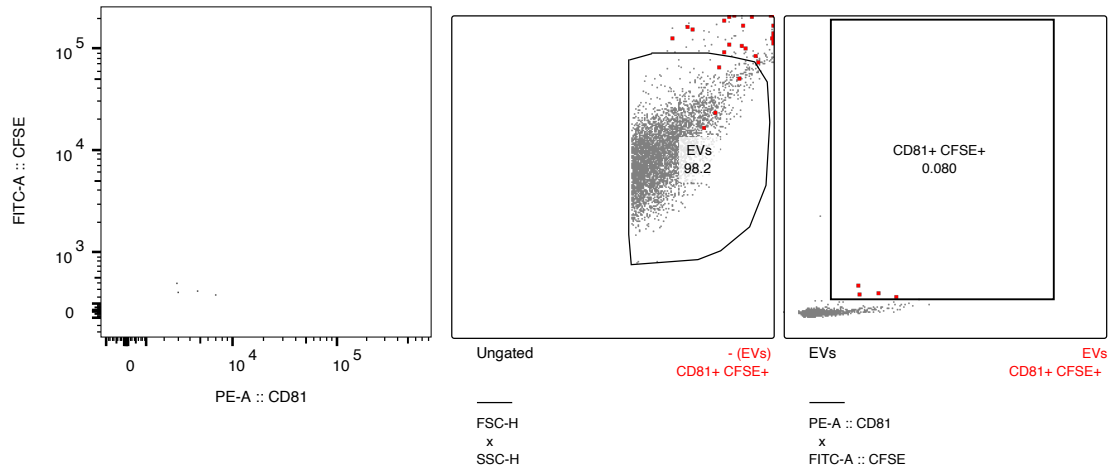

| Sample Name                                | Freq. of EVs |
|--------------------------------------------|--------------|
| Specimen_001_344-3D (IGG staining)_016.fcs | 0.080        |

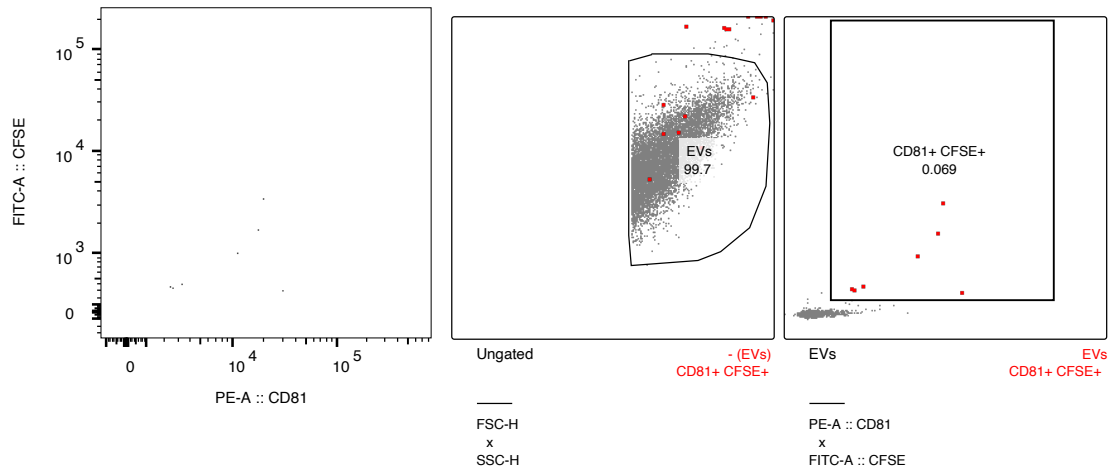

| Sample Name                                 | Freq. of EVs |
|---------------------------------------------|--------------|
| Specimen_001_NP25-3D (IGG staining)_024.fcs | 0.069        |





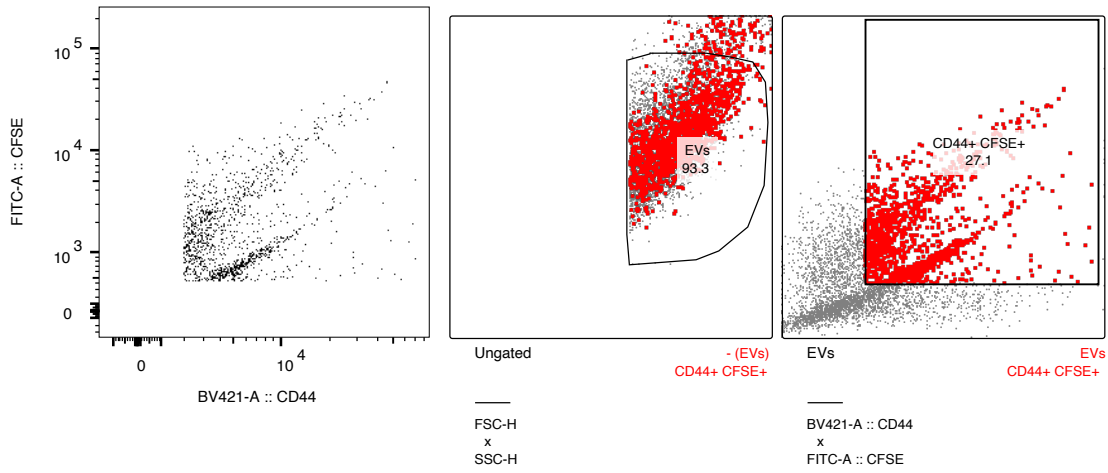

| Sample Name                              | Freq. of EVs |
|------------------------------------------|--------------|
| Specimen_001_21-2D (EV staining)_001.fcs | 27.1         |

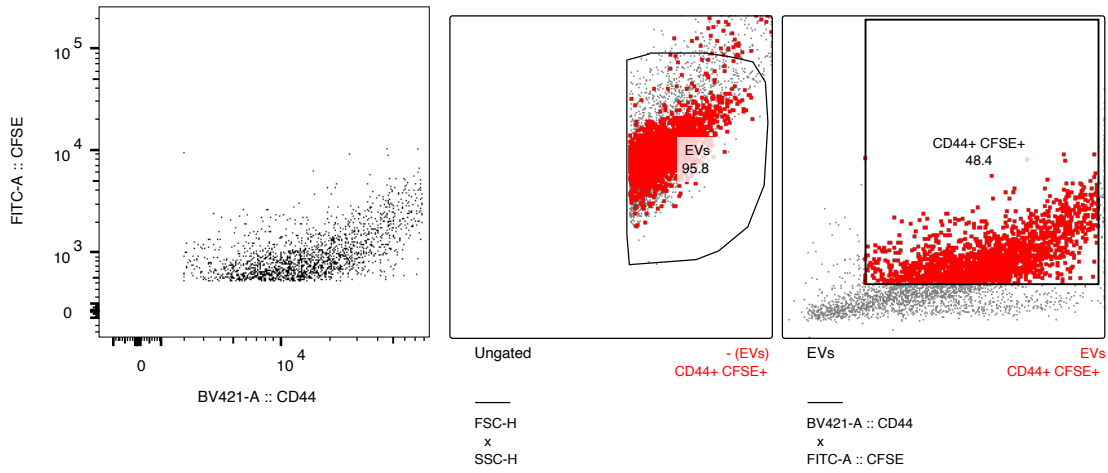

| Sample Name                               | Freq. of EVs |
|-------------------------------------------|--------------|
| Specimen_001_337-2D (EV staining)_009.fcs | 48.4         |

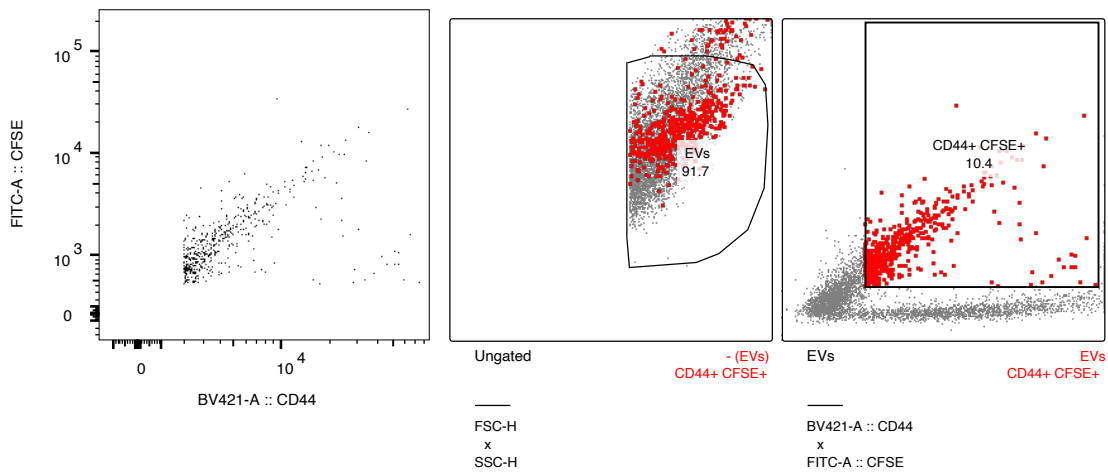

| Sample Name                              | Freq. of EVs |
|------------------------------------------|--------------|
| Specimen_001_57-2D (EV staining)_017.fcs | 10.4         |

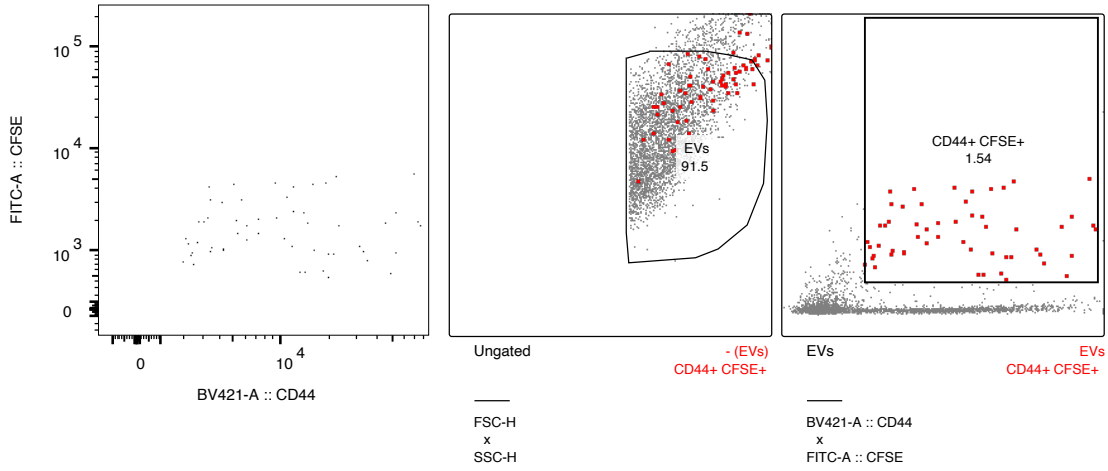

| Sample Name                               | Freq. of EVs |
|-------------------------------------------|--------------|
| Specimen_001_21-2D (IgG staining)_002.fcs | 1.54         |

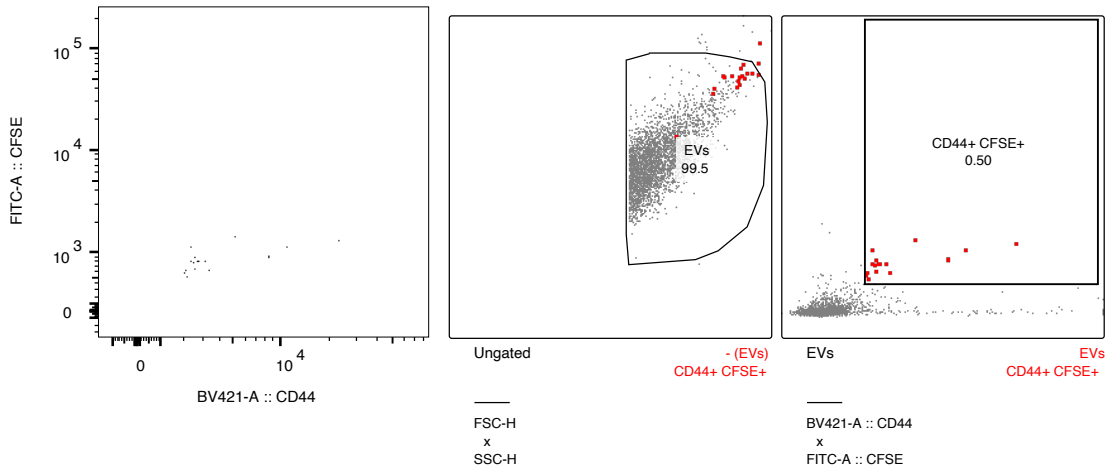

| Sample Name                                | Freq. of EVs |
|--------------------------------------------|--------------|
| Specimen_001_337-2D (IGG staining)_010.fcs | 0.50         |

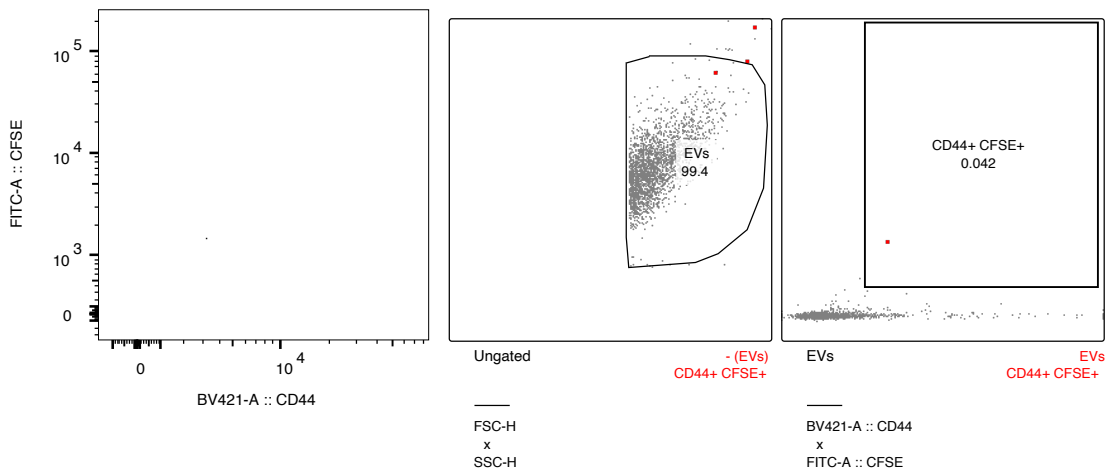

| Sample Name                               | Freq. of EVs |
|-------------------------------------------|--------------|
| Specimen_001_57-2D (IGG staining)_018.fcs | 0.042        |

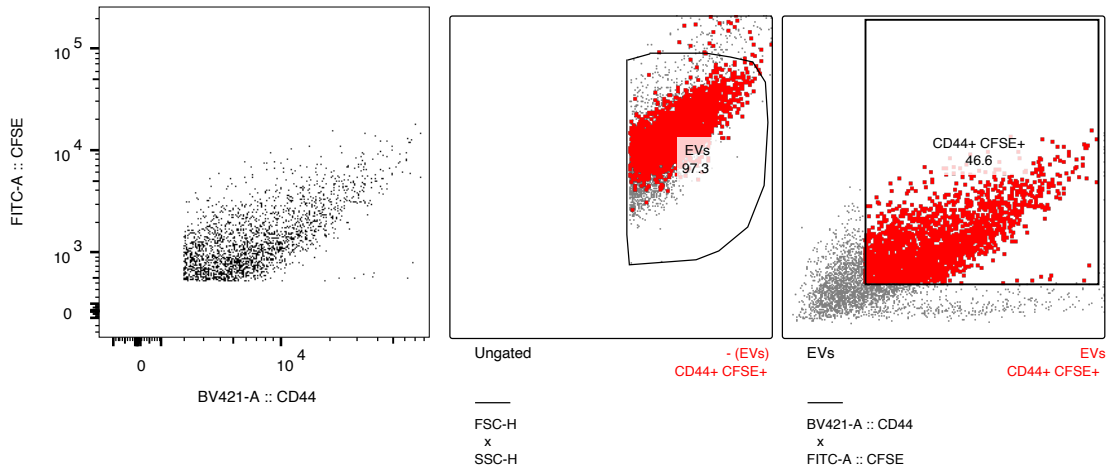

| Sample Name                              | Freq. of EVs |
|------------------------------------------|--------------|
| Specimen_001_21-3D (EV staining)_003.fcs | 46.6         |

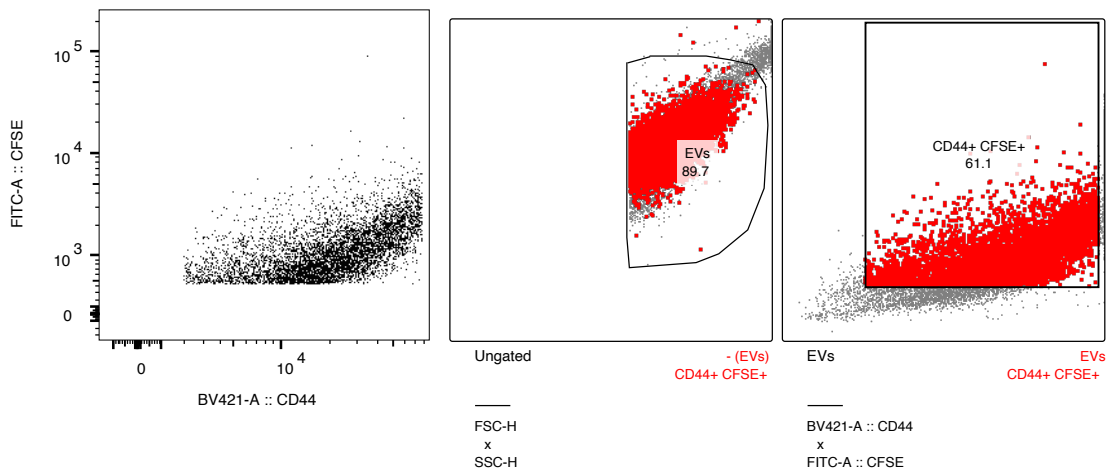

| Sample Name                               | Freq. of EVs |
|-------------------------------------------|--------------|
| Specimen_001_337-3D (EV staining)_011.fcs | 61.1         |

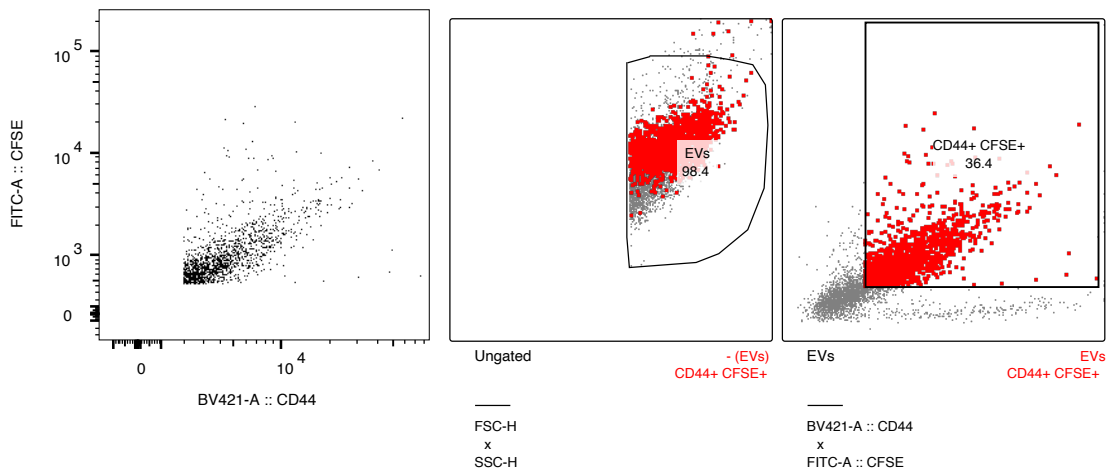

| Sample Name                              | Freq. of EVs |
|------------------------------------------|--------------|
| Specimen_001_57-3D (EV staining)_019.fcs | 36.4         |

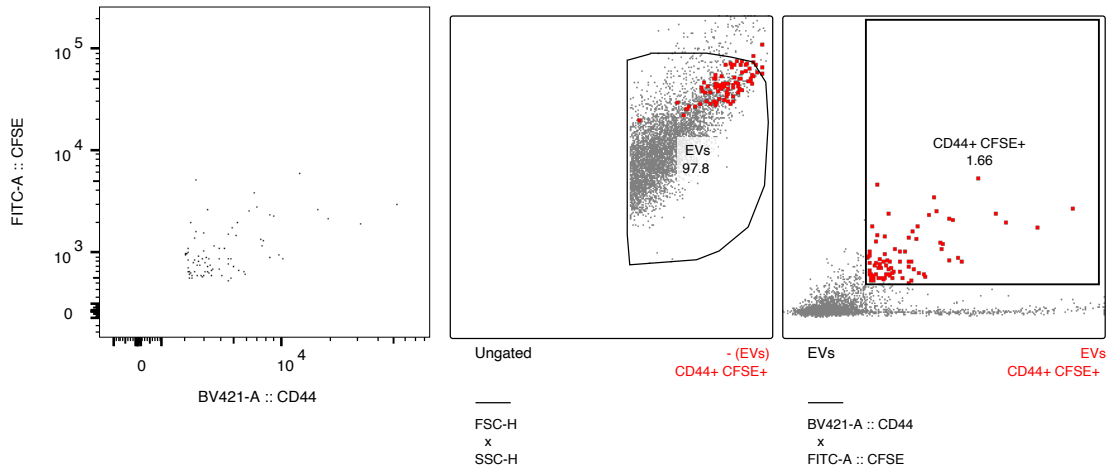

| Sample Name                               | Freq. of EVs |
|-------------------------------------------|--------------|
| Specimen_001_21-3D (IgG staining)_004.fcs | 1.66         |

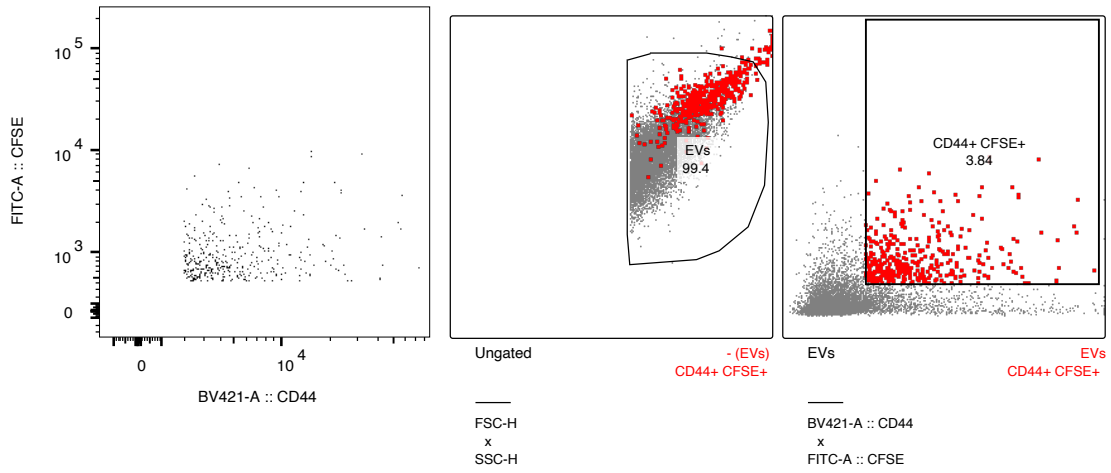

| Sample Name                                | Freq. of EVs |
|--------------------------------------------|--------------|
| Specimen_001_337-3D (IGG staining)_012.fcs | 3.84         |

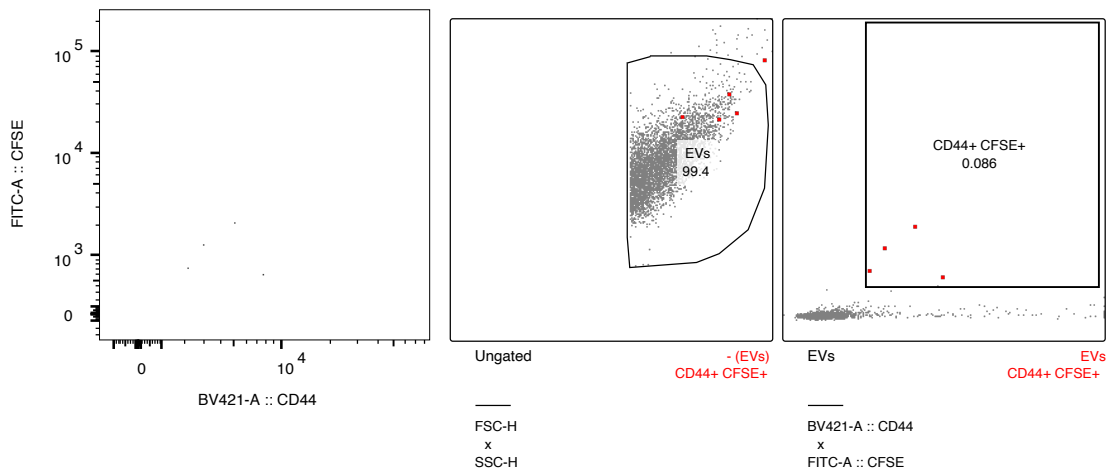

| Sample Name                               | Freq. of EVs |
|-------------------------------------------|--------------|
| Specimen_001_57-3D (IGG staining)_020.fcs | 0.086        |

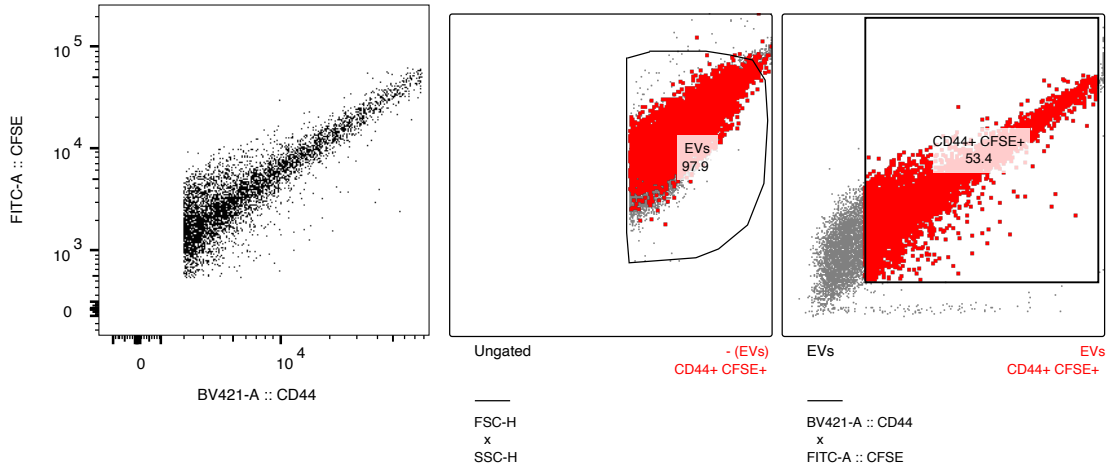

| Sample Name                              | Freq. of EVs |
|------------------------------------------|--------------|
| Specimen_001_27-2D (EV staining)_005.fcs | 53.4         |

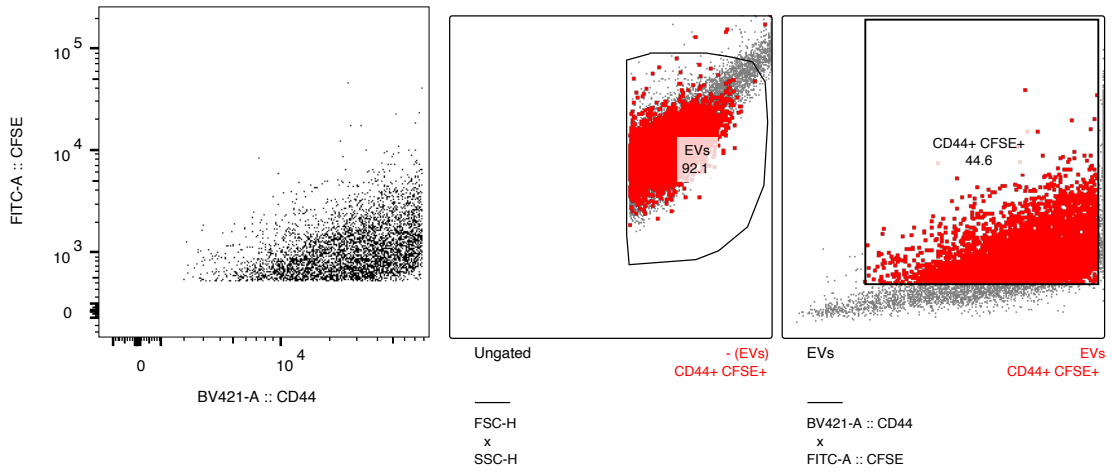

| Sample Name                               | Freq. of EVs |
|-------------------------------------------|--------------|
| Specimen_001_344-2D (EV staining)_013.fcs | 44.6         |

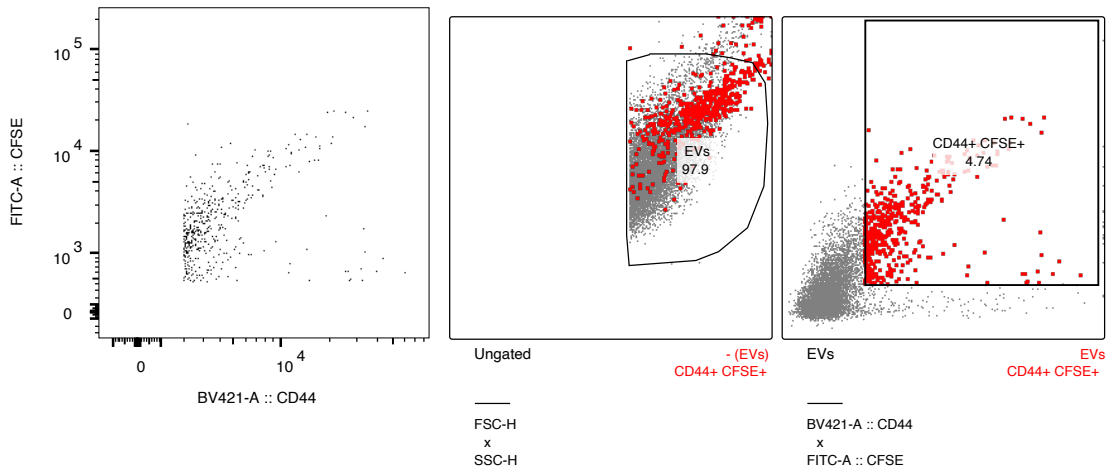

| Sample Name                                | Freq. of EVs |
|--------------------------------------------|--------------|
| Specimen_001_NP25-2D (EV staining)_021.fcs | 4.74         |

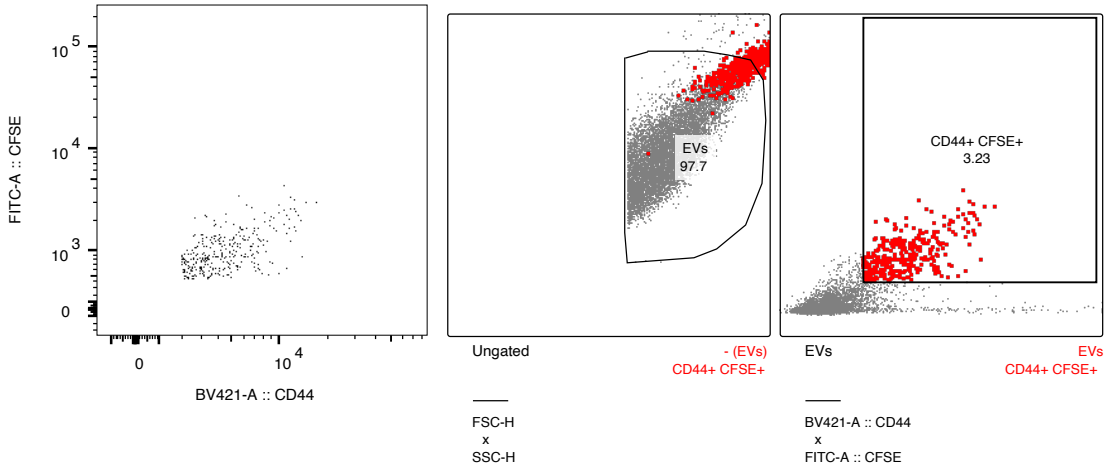

| Sample Name                               | Freq. of EVs |
|-------------------------------------------|--------------|
| Specimen_001_27-2D (IgG staining)_006.fcs | 3.23         |

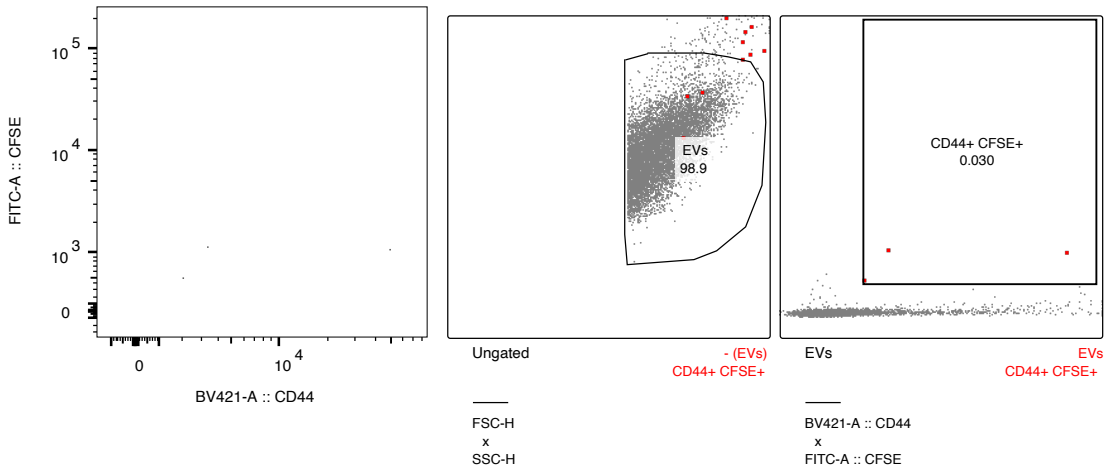

| Sample Name                                | Freq. of EVs |
|--------------------------------------------|--------------|
| Specimen_001_344-2D (IGG staining)_014.fcs | 0.030        |

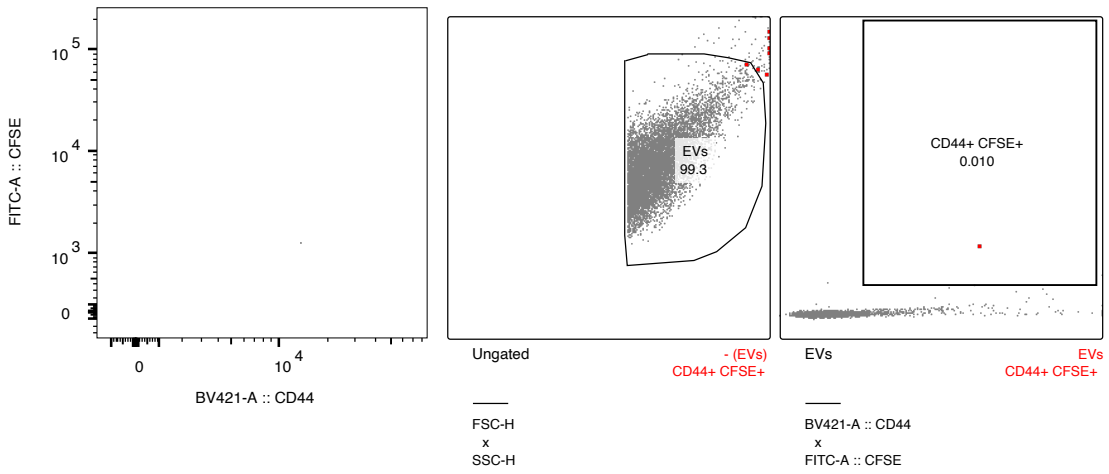

| Sample Name                                 | Freq. of EVs |
|---------------------------------------------|--------------|
| Specimen_001_NP25-2D (IGG staining)_022.fcs | 0.010        |

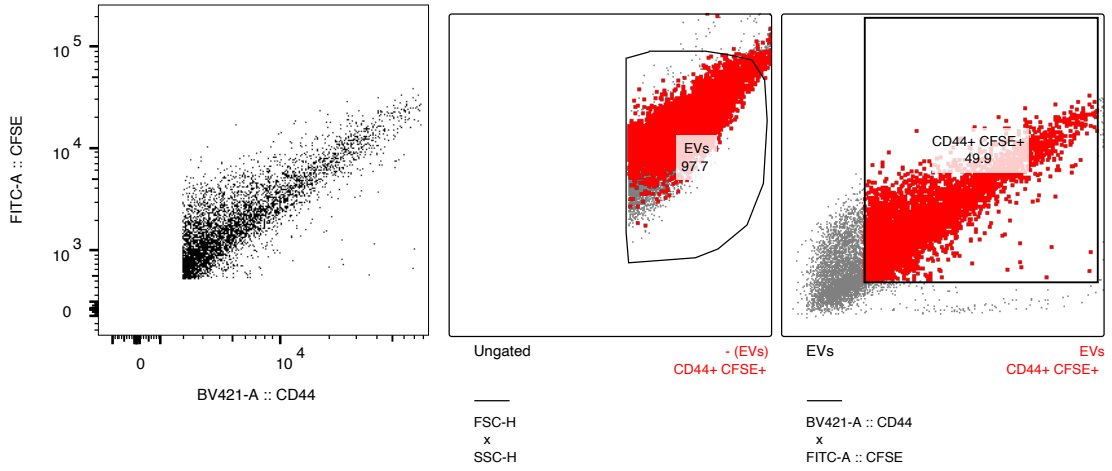

| Sample Name                              | Freq. of EVs |
|------------------------------------------|--------------|
| Specimen_001_27-3D (EV staining)_007.fcs | 49.9         |

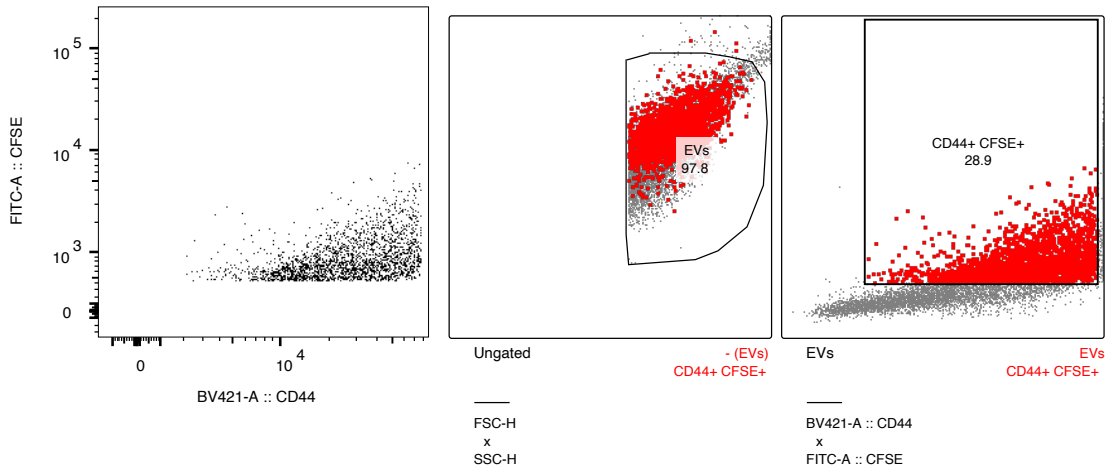

| Sample Name                               | Freq. of EVs |
|-------------------------------------------|--------------|
| Specimen_001_344-3D (EV staining)_015.fcs | 28.9         |

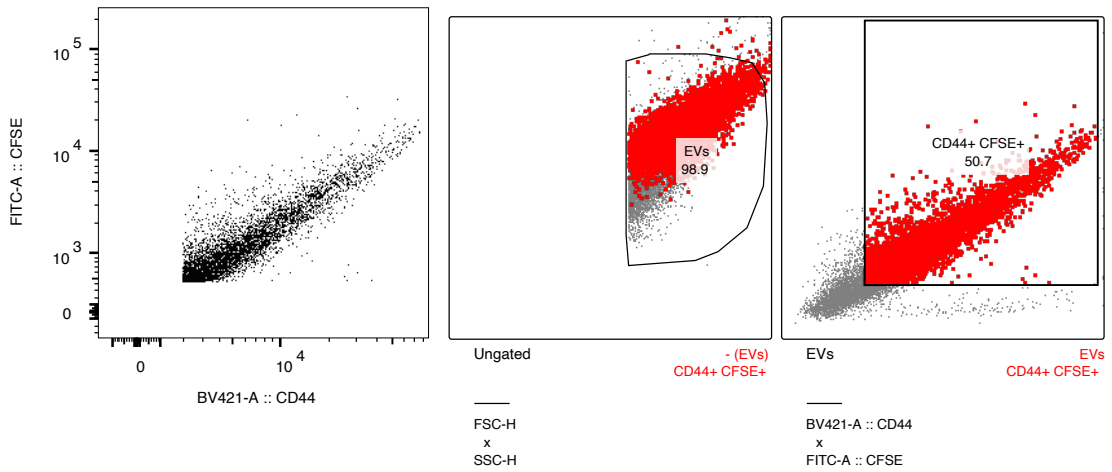

| Sample Name                                | Freq. of EVs |
|--------------------------------------------|--------------|
| Specimen_001_NP25-3D (EV staining)_023.fcs | 50.7         |

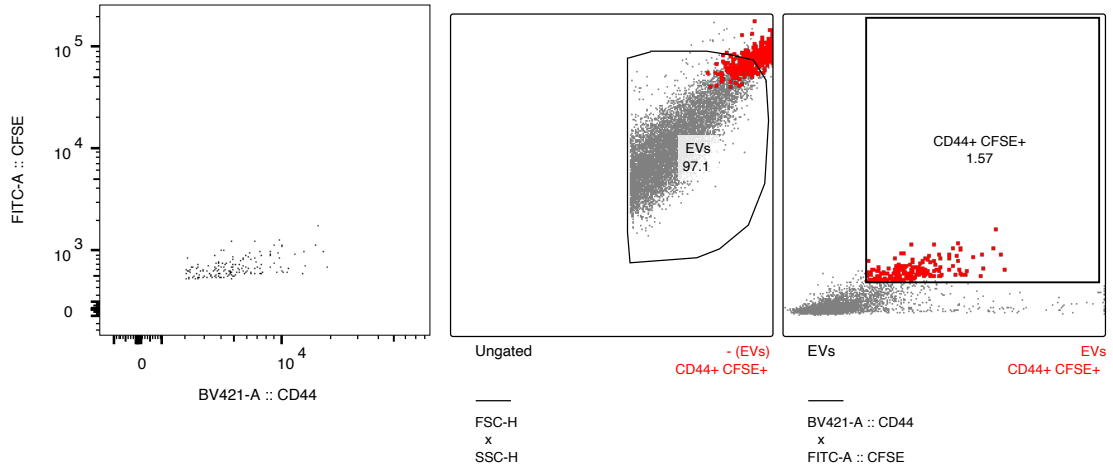

| Sample Name                               | Freq. of EVs |
|-------------------------------------------|--------------|
| Specimen_001_27-3D (IgG staining)_008.fcs | 1.57         |

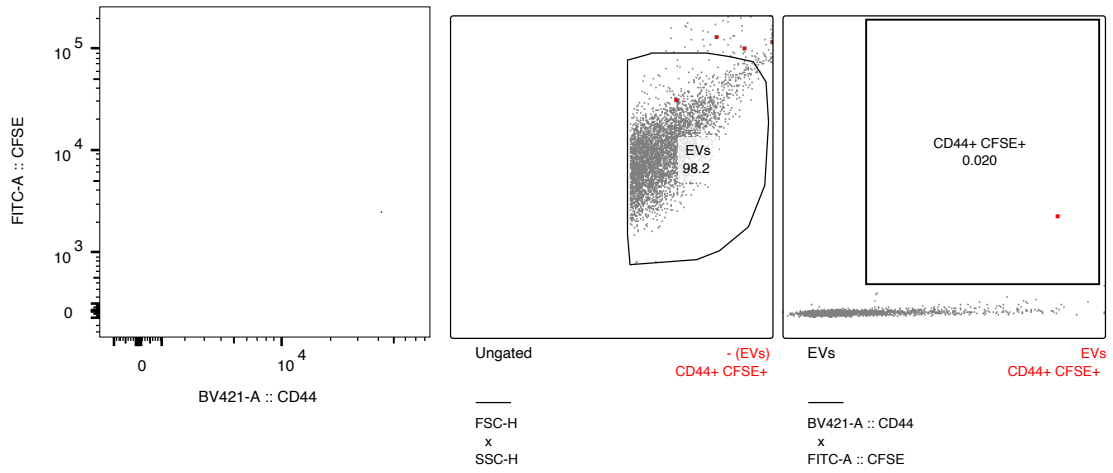

| Sample Name                                | Freq. of EVs |
|--------------------------------------------|--------------|
| Specimen_001_344-3D (IGG staining)_016.fcs | 0.020        |

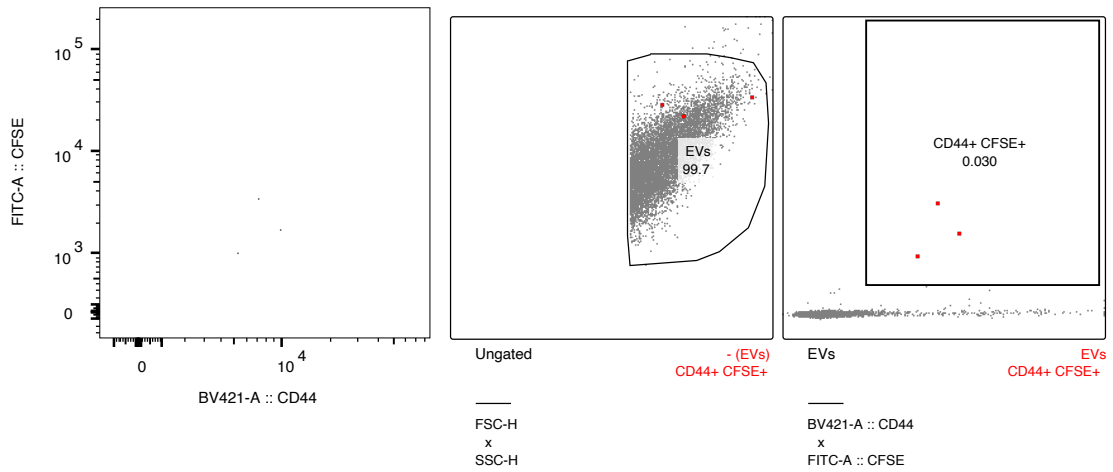

| Sample Name                                 | Freq. of EVs |
|---------------------------------------------|--------------|
| Specimen_001_NP25-3D (IGG staining)_024.fcs | 0.030        |



# PP: Bead-based intracellular marker staining

| Cell line name in the manuscript | Cell line name in the gating dot plot |
|----------------------------------|---------------------------------------|
| BTIC10                           | RAV21                                 |
| BTIC13                           | RAV27                                 |
| BTIC131                          | RAV344                                |
| BTIC18                           | RAV57                                 |
| BTIC129                          | RAV337                                |
| BTIC155                          | NP025                                 |

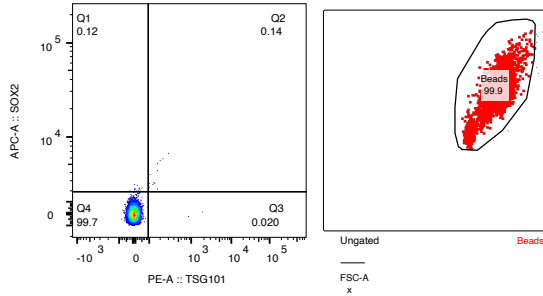

Sample Name  
Specimen\_001\_EF\_IgG\_025.fcs

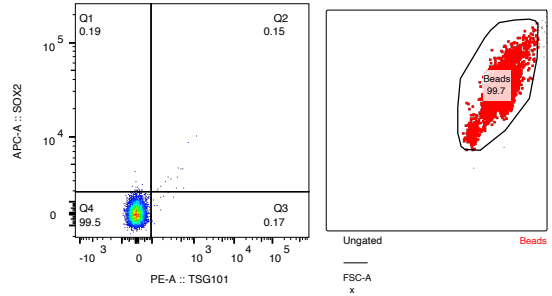

Sample Name  
Specimen\_001\_EF\_intraEV\_stain\_026.fcs

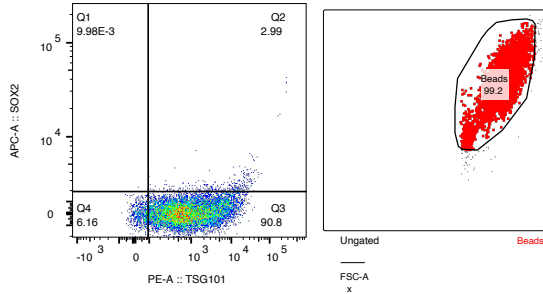

Sample Name  
Specimen\_001\_2D\_RAV27\_intraEV\_stain\_006.fcs

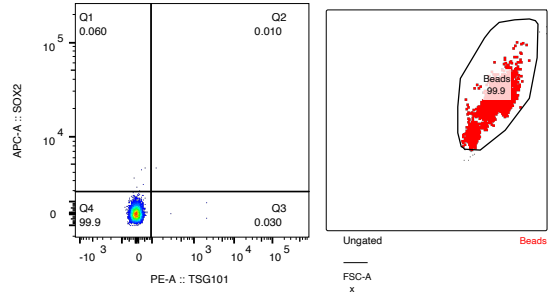

Sample Name  
Specimen\_001\_2D\_RAV57\_IgG\_017.fcs

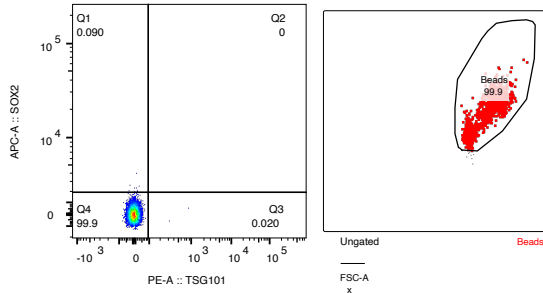

Sample Name  
Specimen\_001\_3D\_NP025\_IgG\_023.fcs

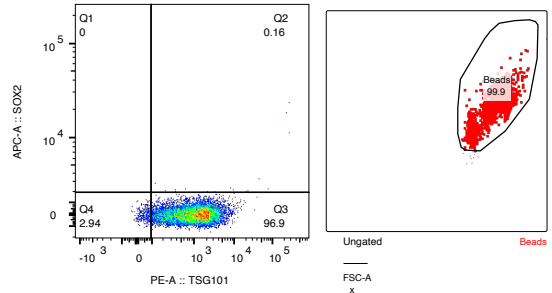

Sample Name  
Specimen\_001\_3D\_NP025\_intraEV\_stain\_024.fcs

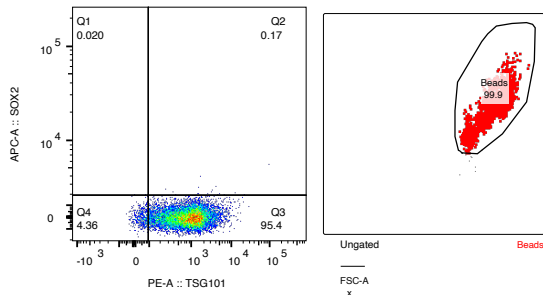

Sample Name  
Specimen\_001\_3D\_RAV57\_intraEV\_stain\_020.fcs

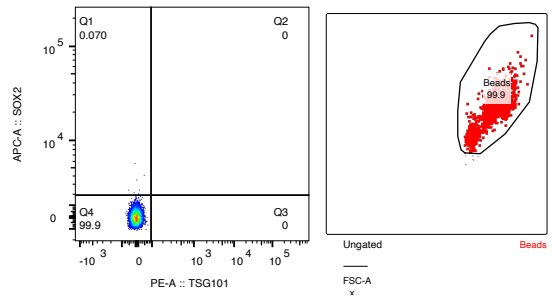

Sample Name  
Specimen\_001\_3D\_RAV37\_IgG\_011.fcs

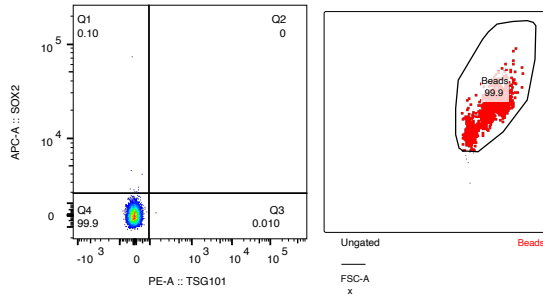

Sample Name  
Specimen\_001\_2D\_NP025\_IgG\_021.fcs

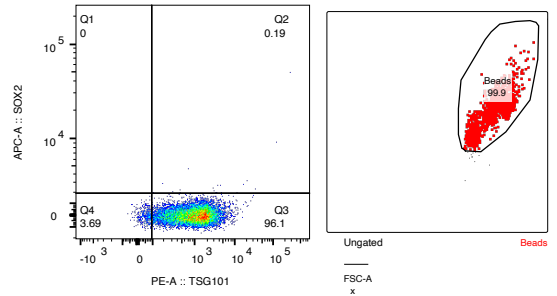

Sample Name  
Specimen\_001\_2D\_NP025\_intraEV\_stain\_022.fcs

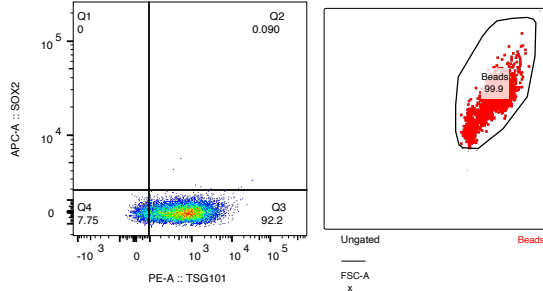

Sample Name  
Specimen\_001\_2D\_RAV57\_intraEV\_stain\_018.fcs

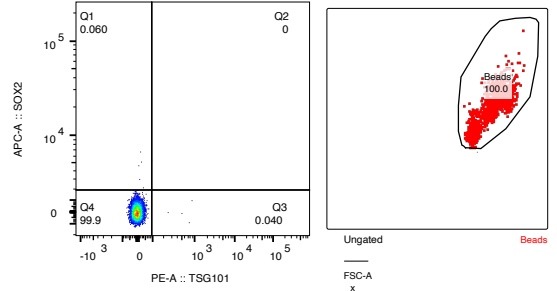

Sample Name  
Specimen\_001\_2D\_RAV337\_IgG\_009.fcs

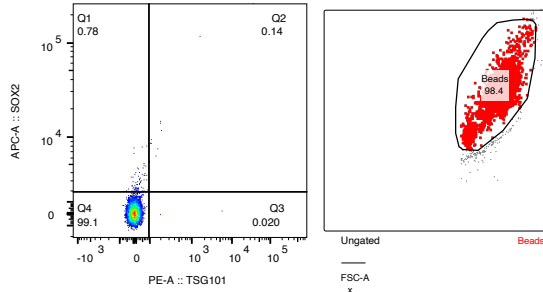

Sample Name  
Specimen\_001\_3D\_RAV21\_IgG\_003.fcs

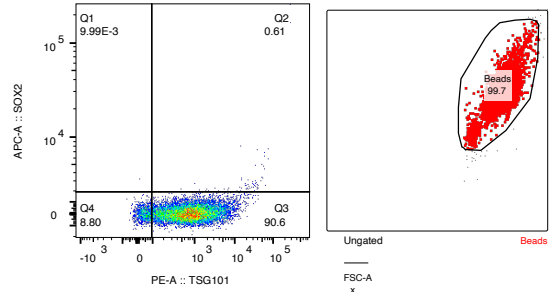

Sample Name  
Specimen\_001\_3D\_RAV21\_intraEV\_stain\_004.fcs

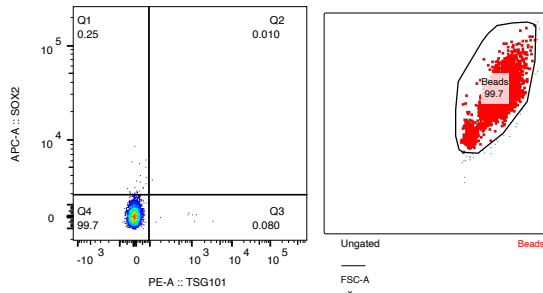

Sample Name  
Specimen\_001\_3D\_RAV344\_IgG\_015.fcs

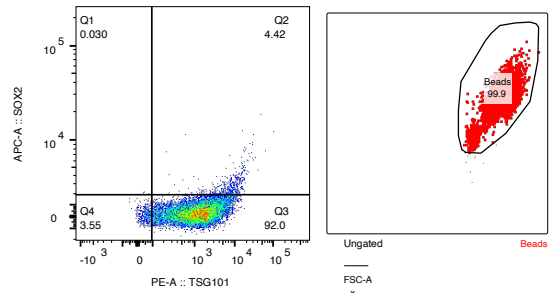

Sample Name  
Specimen\_001\_3D\_RAV344\_intraEV\_stain\_016.fcs

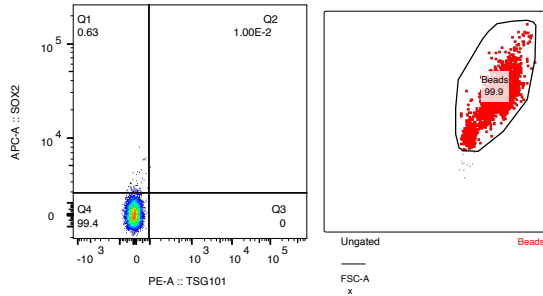

| Sample Name                       |
|-----------------------------------|
| Specimen_001_2D_RAV21_IgG_001.fcs |

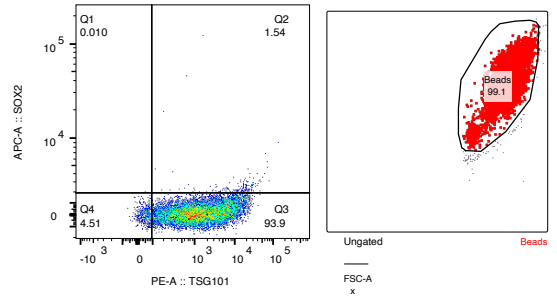

| Sample Name                                 |
|---------------------------------------------|
| Specimen_001_2D_RAV21_intraEV_stain_002.fcs |

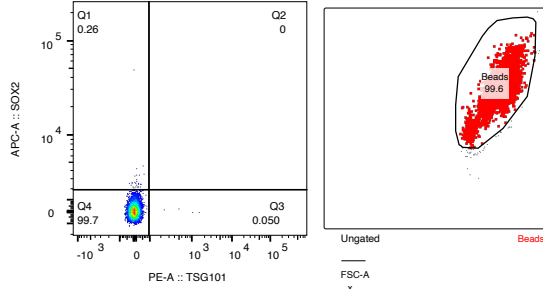

| Sample Name                        |
|------------------------------------|
| Specimen_001_2D_RAV344_IgG_013.fcs |

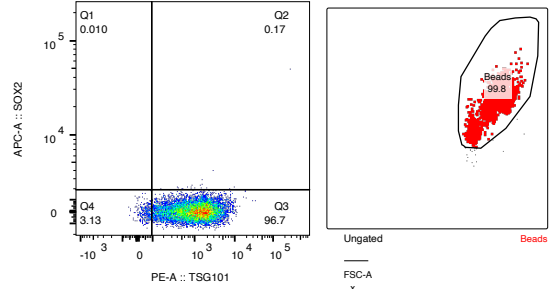

| Sample Name                                 |
|---------------------------------------------|
| Specimen_001_2D_RA337_intraEV_stain_010.fcs |

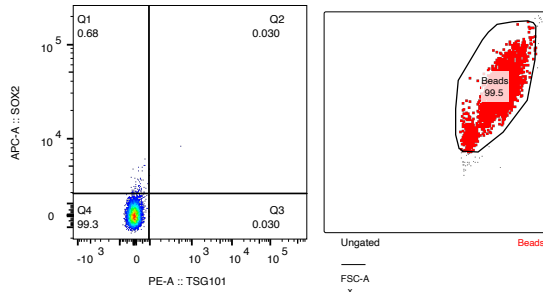

| Sample Name                       |
|-----------------------------------|
| Specimen_001_3D_RAV27_IgG_007.fcs |

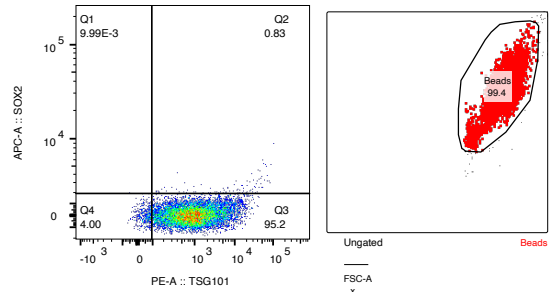

| Sample Name                                 |
|---------------------------------------------|
| Specimen_001_3D_RAV27_intraEV_stain_008.fcs |

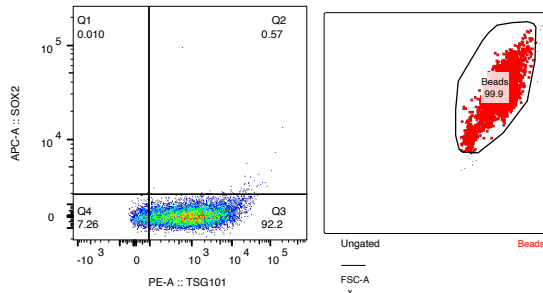

| Sample Name                                 |
|---------------------------------------------|
| Specimen_001_3D_RA337_intraEV_stain_012.fcs |

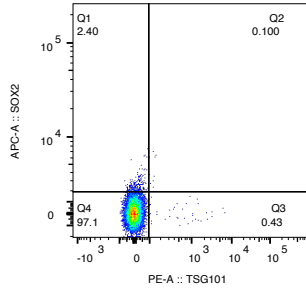

| Sample Name                       |
|-----------------------------------|
| Specimen_001_2D_RAV27_IgG_005.fcs |

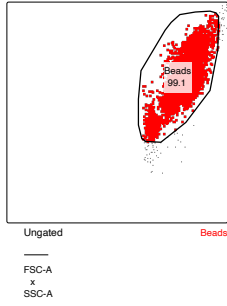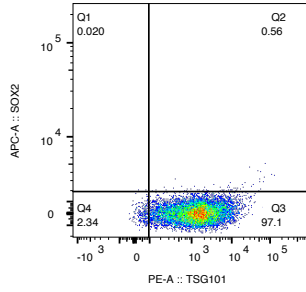

| Sample Name                                 |
|---------------------------------------------|
| Specimen_001_2D_RA344_intraEV_stain_014.fcs |

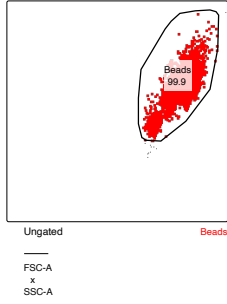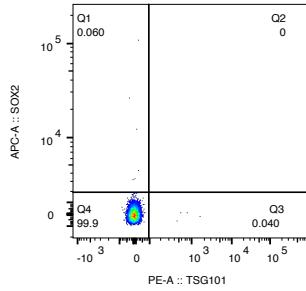

| Sample Name                       |
|-----------------------------------|
| Specimen_001_3D_RAV57_IgG_019.fcs |

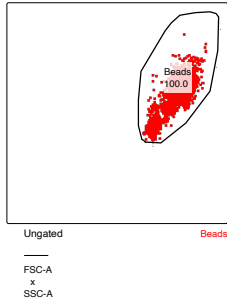



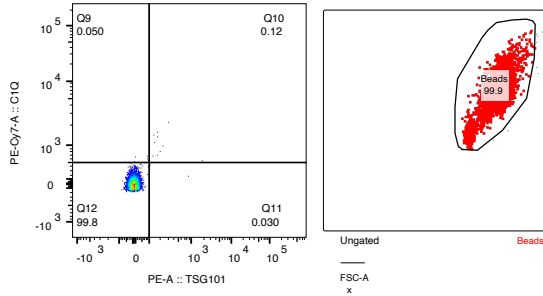

Sample Name  
Specimen\_001\_EF\_IgG\_025.fcs

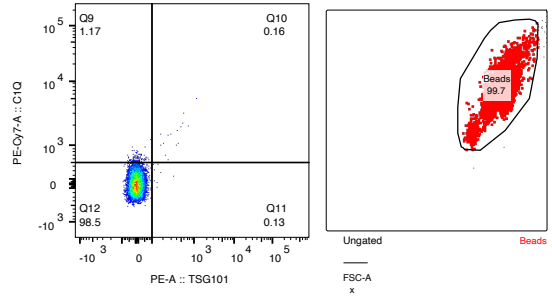

Sample Name  
Specimen\_001\_EF\_intraEV\_stain\_026.fcs

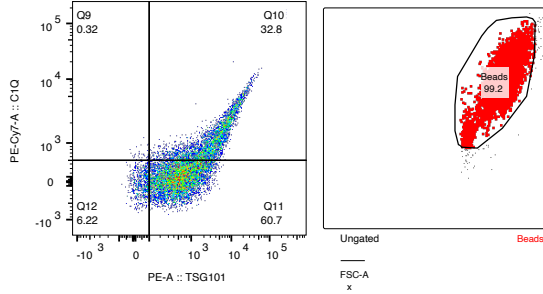

Sample Name  
Specimen\_001\_2D\_RAV27\_intraEV\_stain\_006.fcs

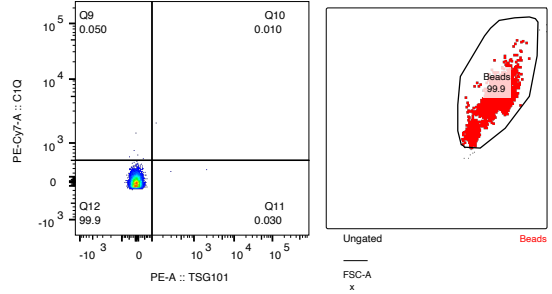

Sample Name  
Specimen\_001\_2D\_RAV57\_IgG\_017.fcs

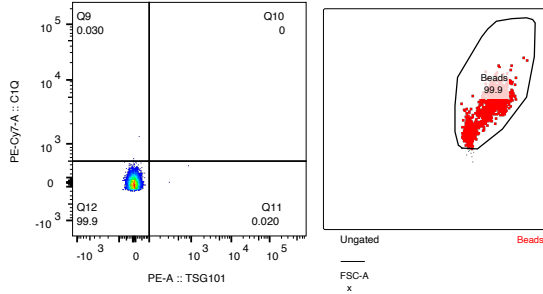

Sample Name  
Specimen\_001\_3D\_NP025\_IgG\_023.fcs

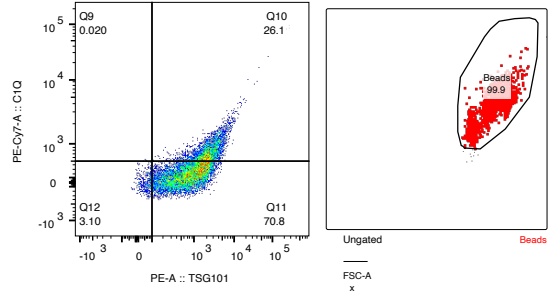

Sample Name  
Specimen\_001\_3D\_NP025\_intraEV\_stain\_024.fcs

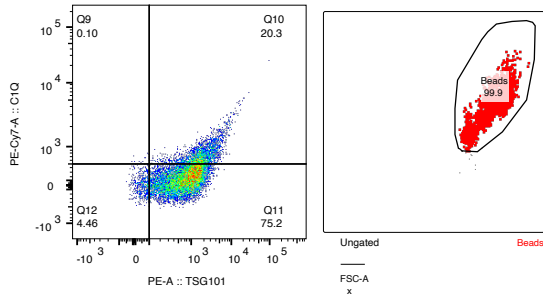

Sample Name  
Specimen\_001\_3D\_RAV57\_intraEV\_stain\_020.fcs

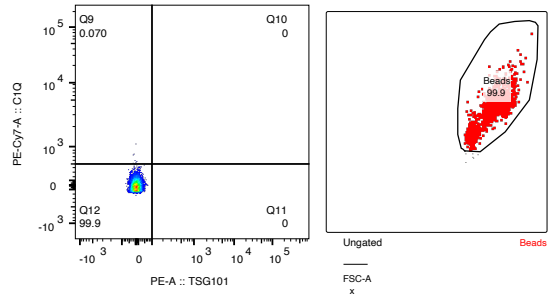

Sample Name  
Specimen\_001\_3D\_RAV37\_IgG\_011.fcs

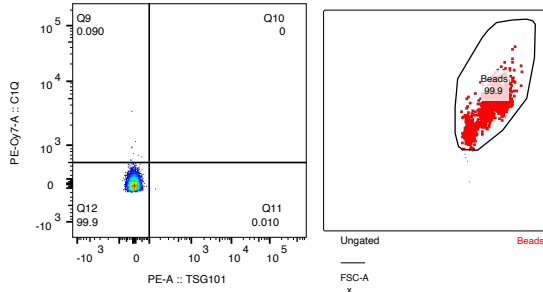

Sample Name  
Specimen\_001\_2D\_NP025\_IgG\_021.fcs

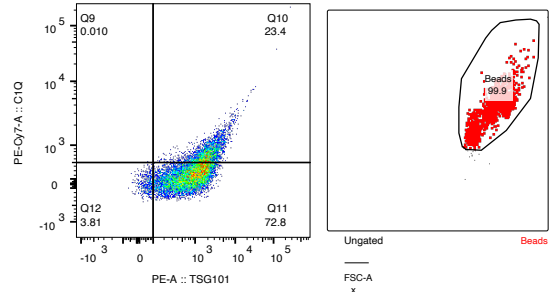

Sample Name  
Specimen\_001\_2D\_NP025\_intraEV\_stain\_022.fcs

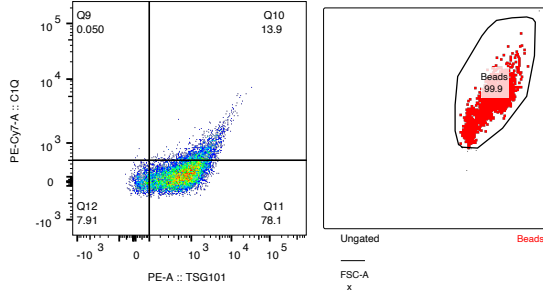

Sample Name  
Specimen\_001\_2D\_RAV57\_intraEV\_stain\_018.fcs

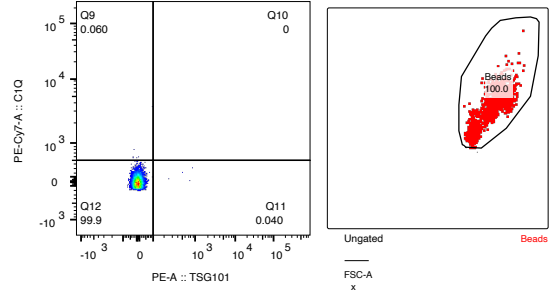

Sample Name  
Specimen\_001\_2D\_RAV337\_IgG\_009.fcs

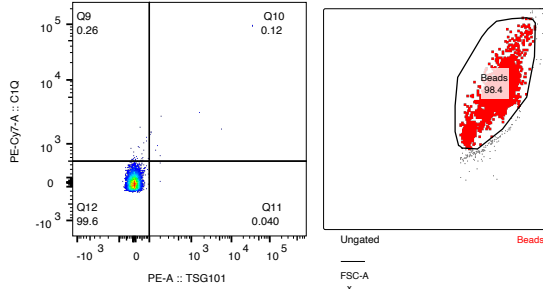

Sample Name  
Specimen\_001\_3D\_RAV21\_IgG\_003.fcs

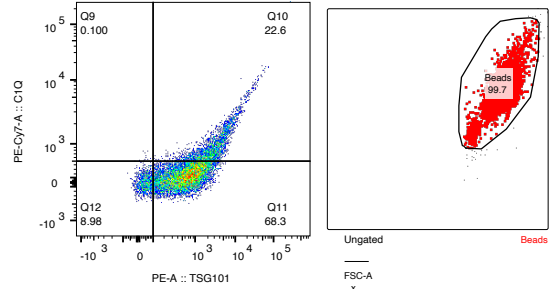

Sample Name  
Specimen\_001\_3D\_RAV21\_intraEV\_stain\_004.fcs

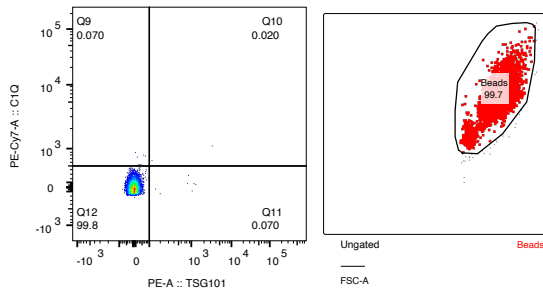

Sample Name  
Specimen\_001\_3D\_RAV344\_IgG\_015.fcs

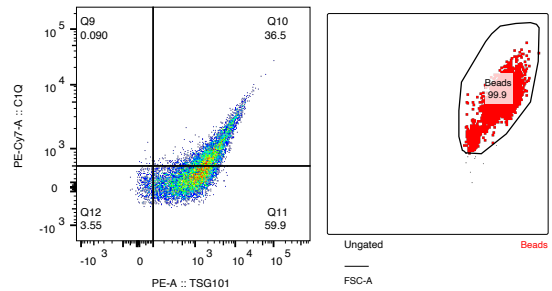

Sample Name  
Specimen\_001\_3D\_RAV344\_intraEV\_stain\_016.fcs



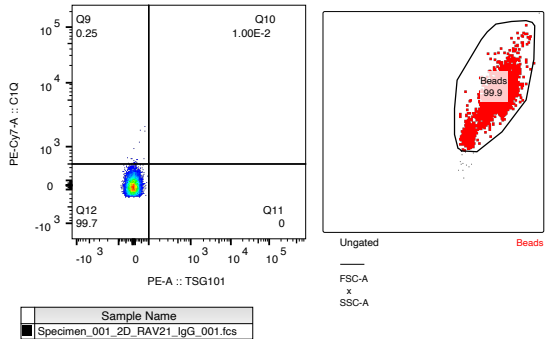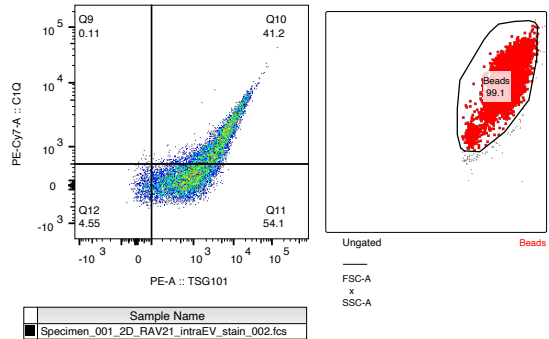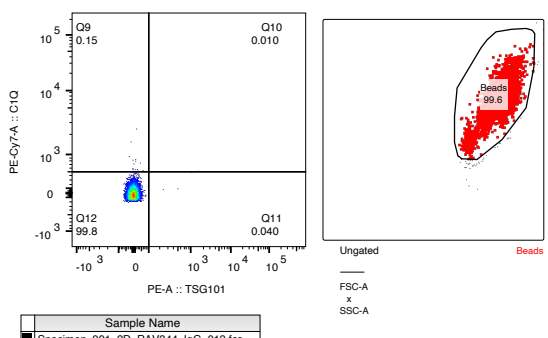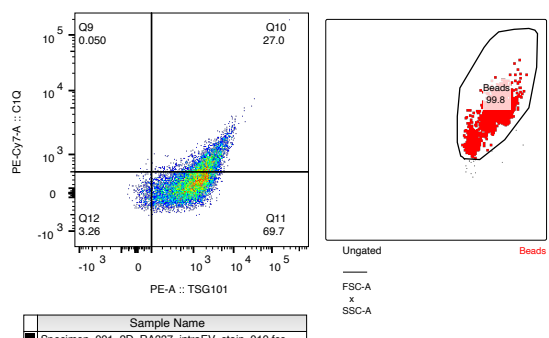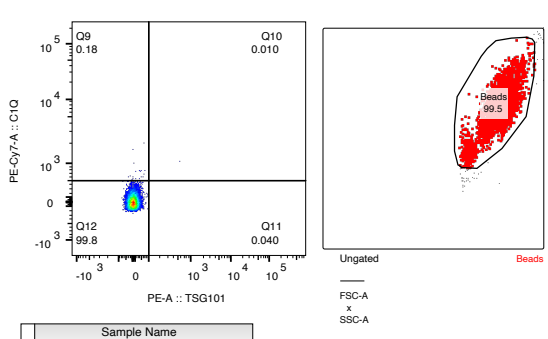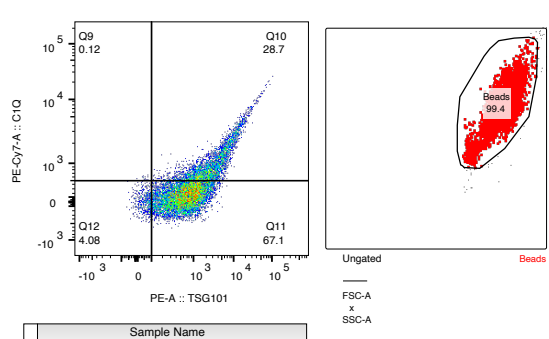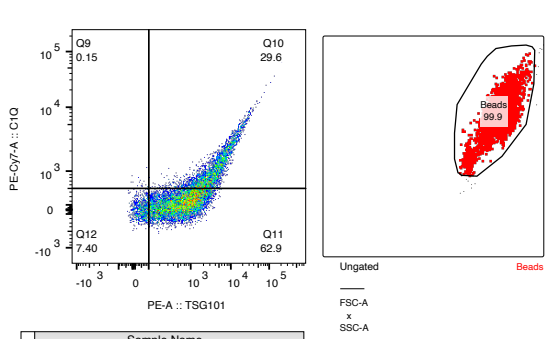

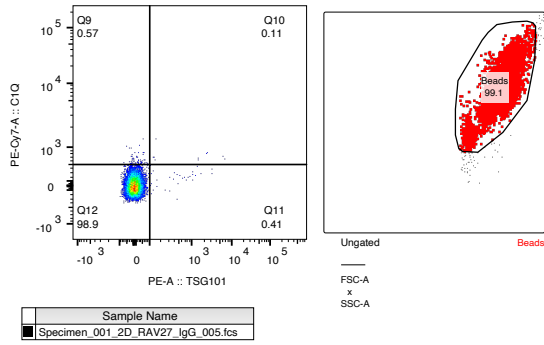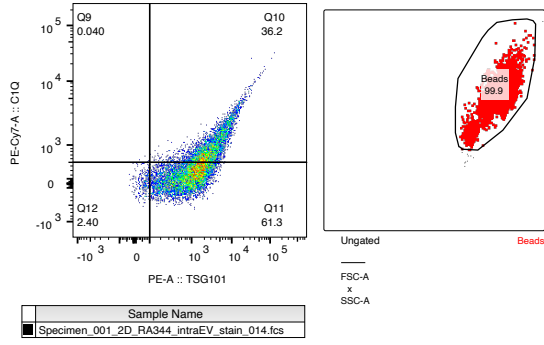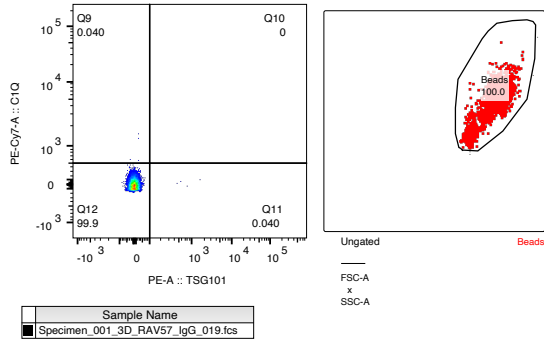



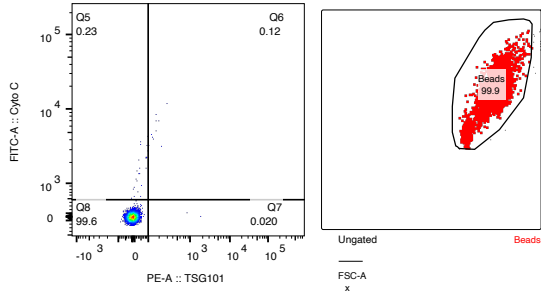

Sample Name  
 Specimen\_001\_EF\_IgG\_025.fcs

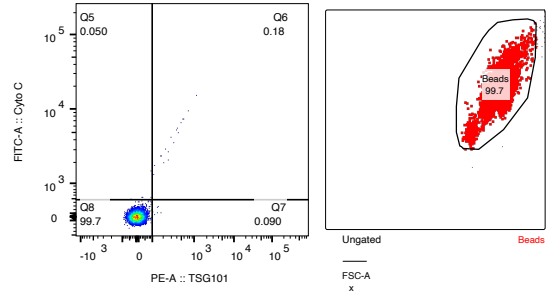

Sample Name  
 Specimen\_001\_EF\_intraEV\_stain\_026.fcs

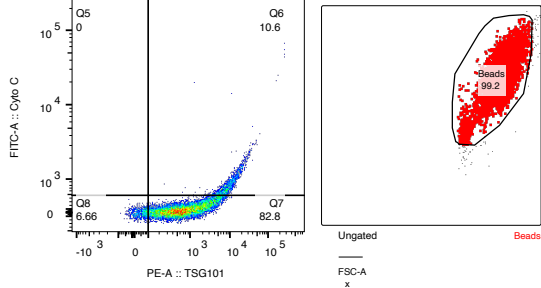

Sample Name  
 Specimen\_001\_2D\_RAV27\_intraEV\_stain\_006.fcs

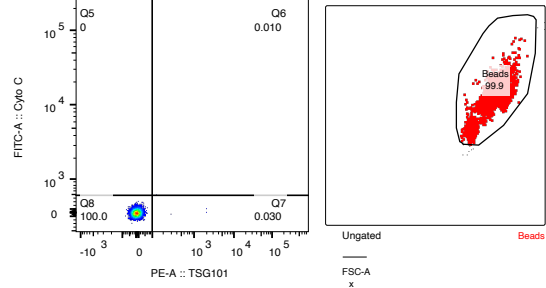

Sample Name  
 Specimen\_001\_2D\_RAV57\_IgG\_017.fcs

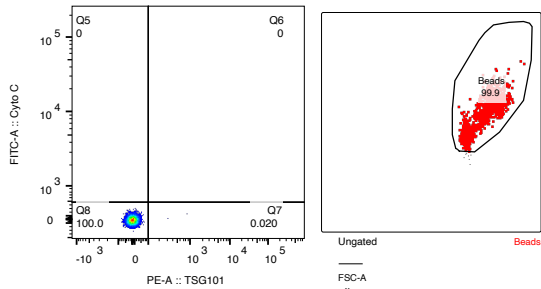

Sample Name  
 Specimen\_001\_3D\_NP025\_IgG\_023.fcs

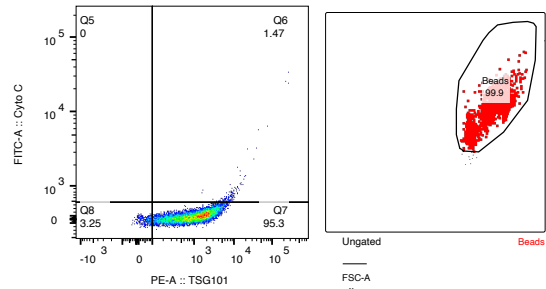

Sample Name  
 Specimen\_001\_3D\_NP025\_intraEV\_stain\_024.fcs

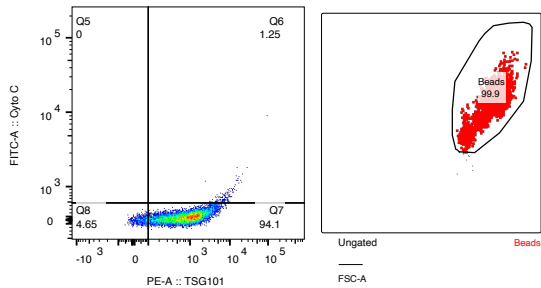

Sample Name  
 Specimen\_001\_3D\_RAV57\_intraEV\_stain\_020.fcs

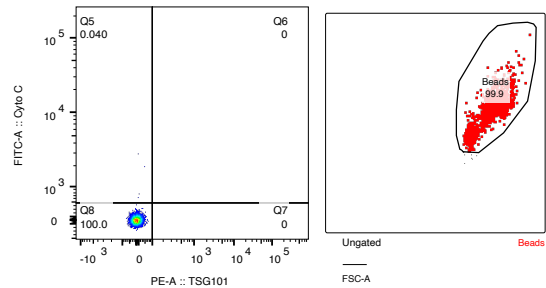

Sample Name  
 Specimen\_001\_3D\_RAV337\_IgG\_011.fcs

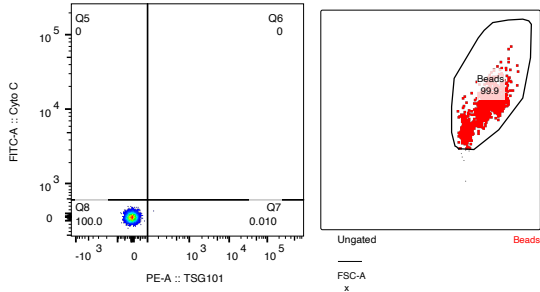

Sample Name  
 Specimen\_001\_2D\_NP025\_IgG\_021.fcs

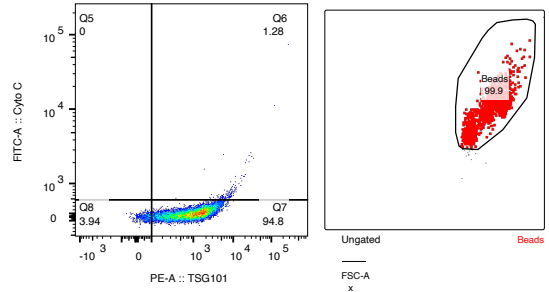

Sample Name  
 Specimen\_001\_2D\_NP025\_intraEV\_stain\_022.fcs

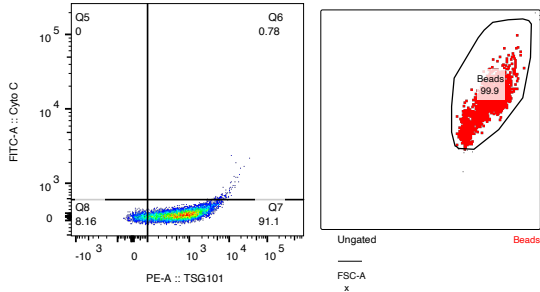

Sample Name  
 Specimen\_001\_2D\_RAV57\_intraEV\_stain\_018.fcs

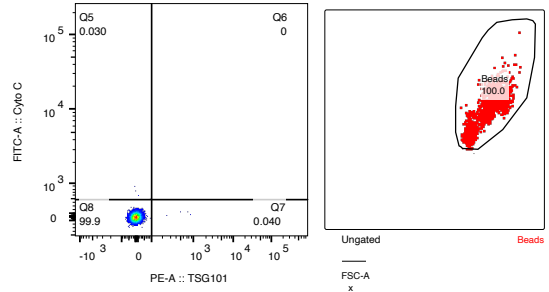

Sample Name  
 Specimen\_001\_2D\_RAV337\_IgG\_009.fcs

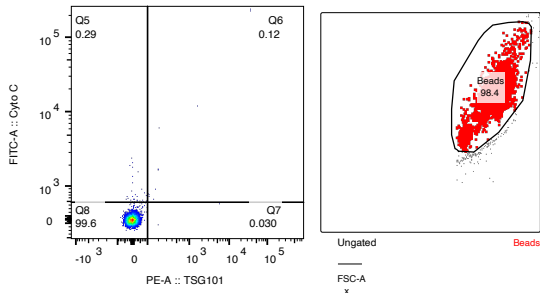

Sample Name  
 Specimen\_001\_3D\_RAV21\_IgG\_003.fcs

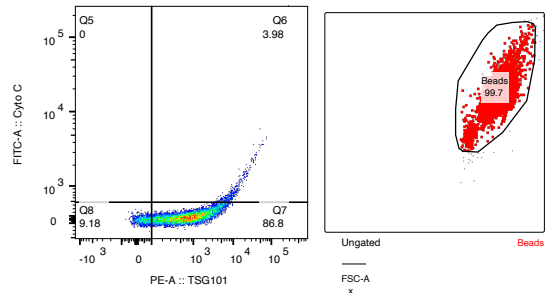

Sample Name  
 Specimen\_001\_3D\_RAV21\_intraEV\_stain\_004.fcs

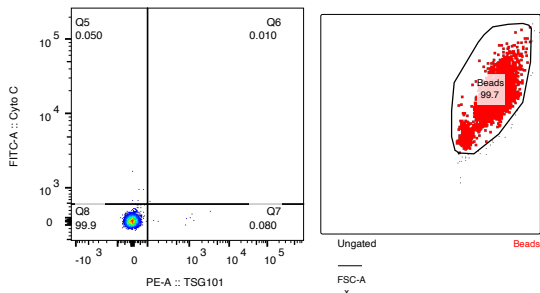

Sample Name  
 Specimen\_001\_3D\_RAV344\_IgG\_015.fcs

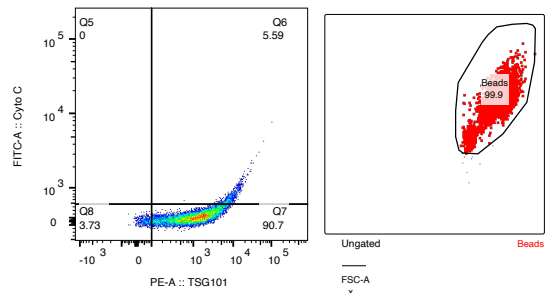

Sample Name  
 Specimen\_001\_3D\_RAV344\_intraEV\_stain\_016.fcs

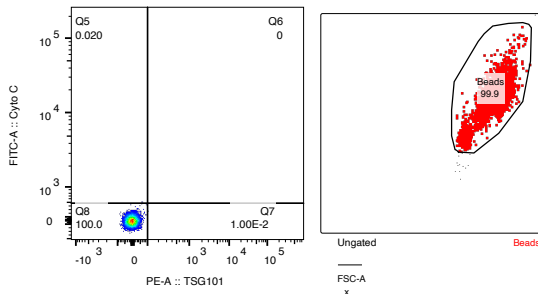

Sample Name  
Specimen\_001\_2D\_RAV21\_IgG\_001.fcs

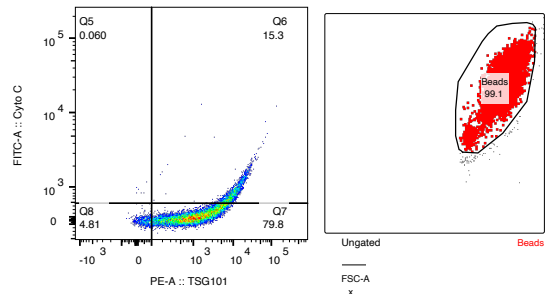

Sample Name  
Specimen\_001\_2D\_RAV21\_intraEV\_stain\_002.fcs

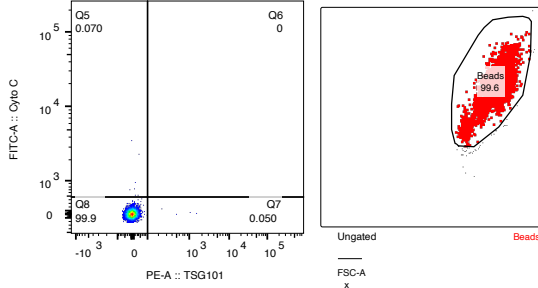

Sample Name  
Specimen\_001\_2D\_RAV344\_IgG\_013.fcs

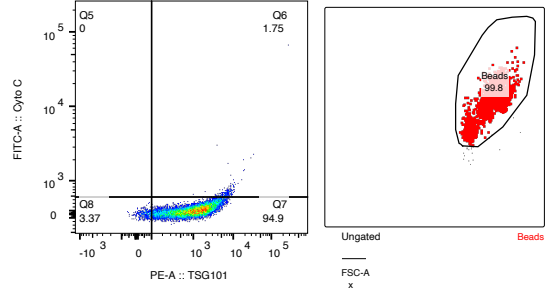

Sample Name  
Specimen\_001\_2D\_RA337\_intraEV\_stain\_010.fcs

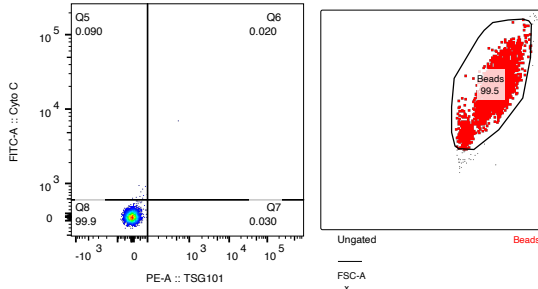

Sample Name  
Specimen\_001\_3D\_RAV27\_IgG\_007.fcs

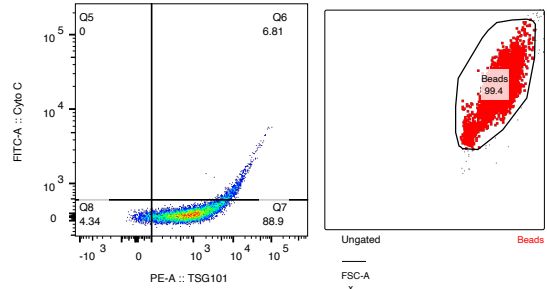

Sample Name  
Specimen\_001\_3D\_RAV27\_intraEV\_stain\_008.fcs

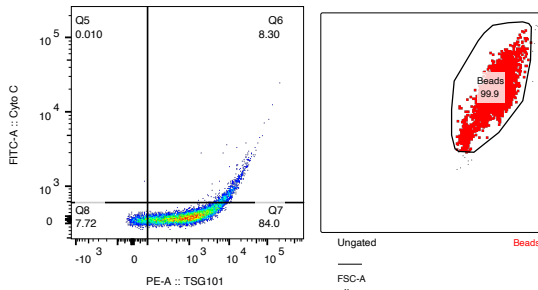

Sample Name  
Specimen\_001\_3D\_RA337\_intraEV\_stain\_012.fcs

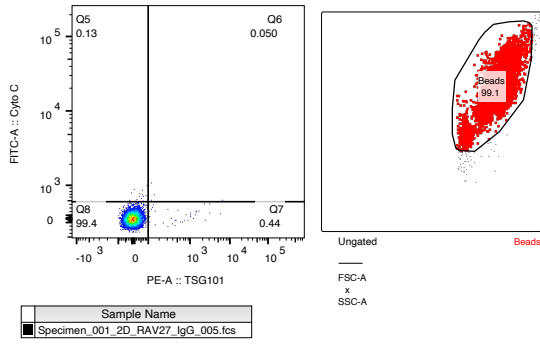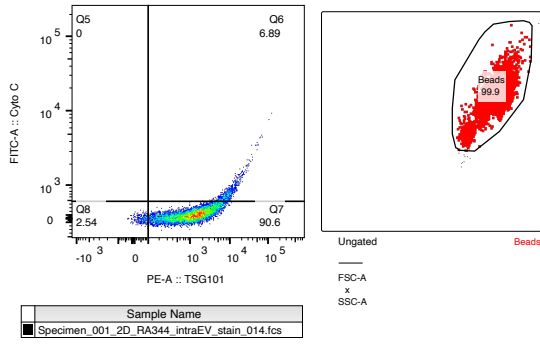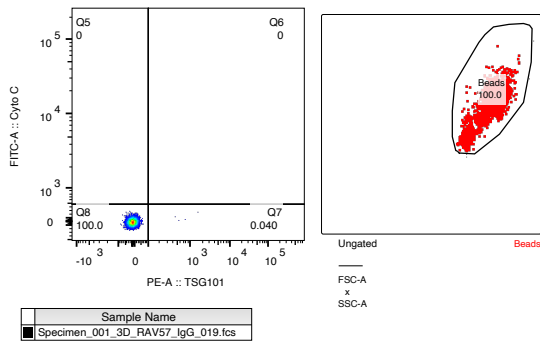

Supplement: DataSheet_2.pdf [file DataSheet_2.pdf]
