# Supplementary material for: Extracellular vesicles secreted by 3D tumor organoids are enriched for immune regulatory signaling biomolecules compared to conventional 2D glioblastoma cell systems
Source: Front Immunol. 2024 Apr 25;15:1388769. doi: 10.3389/fimmu.2024.1388769 (PMC11079215; doi:10.3389/fimmu.2024.1388769)
Supplement: SUPPLEMENTARY DATA SHEET 9 — Reactome overrepresentation analysis of significant proteins in 3D EVs. Full list of significant terms of the Reactome overrepresentation analysis of all significantly regulated proteins in 3D EVs isolated by IA (n=6). [file DataSheet_9.xlsx]

## Sheet: Tabelle1
SDCBP	CNP+F50F36:F67F36:F8F36:F70	YWHAE
ADAM10	HIST1H2AJ;HIST1H2AH	HIST1H4A
TSPAN6	UBB;UBC;UBA52	GNB1
CTNND1	HSPA1B;HSPA1A	GNB2
HIST1H2BL;HIST1H2BM	HSPA8	RAC1;RAC2
DNAJA2	RALA	GNAS
PDCD6	NCAM1	YWHAZ
TSPAN9	CD59	EEF1A1P5;EEF1A1
PGK1	PKM	TUBA1B
NRAS	CD44	TUBB4B
IGKC	ANXA7	HIST2H3A;HIST3H3
IGHG1	NT5E	PRDX1
IGHG2	MDK	MFGE8
HLA-B	CFL1	SCARB2
ANXA1	MSN	FLOT2
THY1	YWHAQ	DPYSL2
HLA-A	CD82	FSCN1
GNAI2	GNA11	KPRP
ATP1A1	DNAJA1	BROX
ATP1B1	YWHAB	CSPG4
ITGB1	CTNNB1	GOLGA7
IGKV4-1	BSG	SLC44A2
ENO1	SLC1A3	TSPAN14
ITGAV	CD151	PDCD6IP
ANXA2;ANXA2P2	RAB5C	SLC44A1
TUBB	RAB7A	NCSTN
PFN1	ATP1B3	IGSF8
HSP90AA1	CD81	TSG101
ANXA6	TPI1	TUBB2B
SLC3A2	ACTB	TTYH3
HSP90AB1	CDC42	CHMP4B
ANXA5	ARF1;ARF3	LIN7C
CD63	RAP1B	DIP2B
GSTP1	RHOA	VPS28
ANXA4	YWHAG	NPTN
